# Supplementary material
Source: publisher figshare collection journal article supplement (https://plos.figshare.com/articles/dataset/_/4909007)
Supplement: Supplementary file 1 [file 1]

Archive with 10 entries (10 files):
- S1 Fig.tif
- S2 Fig.TIF
- S3 Fig.TIF
- S4 Fig.TIF
- S5 Fig.TIF
- S6 Fig.TIF
- S7 Fig.tif
- S1 Table.xlsx
- S2 Table.xlsx
- S1 Text.pdf
