# Supplementary material
Source: publisher figshare collection journal article supplement (https://plos.figshare.com/articles/dataset/_/4909007)
Supplement: Supplementary file 1 [file 1 › S1 Table.xlsx]

## Sheet: Table1_normalized_counts_sample
	Minus_Dox	Plus_Dox	Satellite_cells
0610007P14Rik	5731.81	5180.68	809.49
0610009B22Rik	4095.68	3153.33	520.703
0610009L18Rik	14.0725	4.18523	8.77484
0610009O20Rik	2717.97	2292.79	1899.76
0610010F05Rik	493.247	835.512	462.131
0610010K14Rik	1774.33	2552.96	643.991
0610011F06Rik	516.196	834.392	789.057
0610012G03Rik	95.5432	79.8855	10.0724
0610030E20Rik	297.631	315.404	770.951
0610037L13Rik	3115.04	2597.52	2980.57
0610038B21Rik	14.5034	11.0395	0.878731
1110002L01Rik	175.32	111.279	26.2965
1110004E09Rik	680.26	811.222	341.424
1110004F10Rik	17348	13201.4	6143.72
1110008F13Rik	31.9671	46.9228	11.4171
1110008L16Rik	1689.06	904.477	785.714
1110008P14Rik	800.707	1094.22	244.48
1110012L19Rik	2778.87	2032.15	506.002
1110017D15Rik	6.37357	9.04683	8.26858
1110019D14Rik	434.541	353.287	78.3231
1110020A21Rik	68.9825	13.9099	37.1299
1110028F18Rik	17.927	0	8.66576
1110032A03Rik	415.447	208.42	369.402
1110034G24Rik	418.091	205.066	164.389
1110037F02Rik	2806.74	2888.17	2113.24
1110038B12Rik	1535.34	1796.7	3532.61
1110038F14Rik	2553.84	2489.86	1073.46
1110046J04Rik	267.701	103.825	103.936
1110051M20Rik	3494.38	2375.84	1767.41
1110059E24Rik	2399.67	2063.95	1026.49
1110059G10Rik	1284.05	1147.8	832.371
1110065P20Rik	7.22745	15.4429	4.38246
1190002N15Rik	4543.88	2046.25	2484.15
1190007I07Rik	81.2744	95.8366	30.5747
1300002E11Rik	470.675	465.113	576.083
1500004A13Rik	87.2979	99.4492	20.1538
1500009L16Rik	141.609	40.8598	57.045
1500011B03Rik	553.096	274.154	91.2376
1500011K16Rik	796.677	576.443	259.223
1500015A07Rik	125.165	124.764	334.897
1500026H17Rik	6.75601	4.57761	4.35672
1600002H07Rik	359.26	812.167	390.718
1600002K03Rik	388.728	280.593	102.533
1600012H06Rik	2293.25	1845.8	1589.72
1600014C10Rik	1877.94	1759.55	205.272
1600020E01Rik	123.265	91.1012	1305.71
1600023N17Rik	3.64204	24.5305	11.036
1700001L05Rik	256.684	213.864	346.168
1700001L19Rik	4.02448	7.61192	42.3944
1700001P01Rik	0	1.17677	51.0957
1700003E16Rik	0	2.56323	34.1781
1700007J10Rik	0	1.64343	25.7721
1700007L15Rik	148.689	138.347	7.40463
1700008J07Rik	0.447164	85.5285	88.7348
1700010I14Rik	26.3908	8.03448	41.2673
1700012D01Rik	24.8772	26.2586	17.9334
1700012D14Rik	19.8775	11.855	10.1022
1700017B05Rik	478.135	1182.8	2048.7
1700020D05Rik	10.4547	0	11.8335
1700020I14Rik	1273.19	960.028	1265.35
1700021F05Rik	3839.25	2862.59	948.308
1700024P16Rik	215.994	0.229951	1.31007
1700025G04Rik	242.767	101.608	380.263
1700028E10Rik	1.81293	0	6.94016
1700028J19Rik	12.0977	14.731	56.5571
1700029I15Rik	0.447164	0.597937	8.39752
1700029J07Rik	117.47	138.427	451.38
1700030K09Rik	406.401	164.045	273.54
1700034H15Rik	0.455255	0.236706	7.36054
1700034J05Rik	15.9016	3.96616	43.5746
1700037H04Rik	3038.13	5074.09	421.029
1700052K11Rik	54.2665	48.4744	22.8214
1700061G19Rik	0.894329	1.84373	63.2417
1700066B19Rik	7.64225	13.2347	47.0599
1700066M21Rik	150.441	196.966	35.2359
1700084E18Rik	15.8368	8.26917	5.74909
1700086L19Rik	15.4787	7.24394	155.079
1700086O06Rik	95.8668	121.178	12.8648
1700088E04Rik	6.34121	3.69009	7.04185
1700094D03Rik	269.329	195.091	591.624
1700096K18Rik	39.8116	16.4942	4.8273
1700101I11Rik	30.0468	4.48453	192.563
1700102P08Rik	2.68299	3.49538	51.9932
1700105P06Rik	7.23554	3.48979	3.46702
1700109H08Rik	6.30076	6.01662	43.3669
1700109K24Rik	13.9835	17.5768	137.432
1700113A16Rik	15.0153	22.4357	27.589
1700123M08Rik	138.052	42.3869	51.3297
1700123O20Rik	2030.33	1647.07	1359.68
1810009A15Rik	3.60968	8.0445	4.38119
1810010H24Rik	53.0059	34.2349	40.2831
1810011O10Rik	336.28	1829.69	26439.5
1810013L24Rik	4326.69	2311.45	9039.27
1810014B01Rik	215.828	228.595	211.357
1810019D21Rik	14.3093	73.7808	12.34
1810021B22Rik	9.47945	5.13997	12.6437
1810022K09Rik	6073.95	4387	1966.92
1810026B05Rik	636.527	379.474	3203.74
1810026J23Rik	965.075	652.241	693.966
1810030O07Rik	2319.33	1763.95	1049.55
1810032O08Rik	239.791	362.149	3583.22
1810034E14Rik	1.82102	9.24152	58.1653
1810037I17Rik	4272.71	6146.56	4097.96
1810041L15Rik	181.03	50.885	10.5369
1810043G02Rik	727.452	1072.69	737.709
1810043H04Rik	455.778	741.56	262.533
1810044D09Rik	93.8031	21.1161	20.1798
1810055G02Rik	3312.25	4103.04	10599.6
1810058I24Rik	8504.42	5364.72	1931.59
1810062G17Rik	6.79646	0	41.4695
2010001A14Rik	31.1213	65.2235	50.356
2010107E04Rik	8761.61	5887.42	1041.78
2010107G23Rik	165.697	101.071	9.22072
2010111I01Rik	11328.4	7061.61	40621.5
2010204K13Rik	573.637	806.957	180.337
2010310C07Rik	0.455255	0.459901	11.062
2010320M18Rik	668.227	598.518	249.982
2200002D01Rik	1622.04	2403.62	65.6605
2210013O21Rik	3569.05	2424.19	707.944
2210016F16Rik	60.0473	121.886	162.839
2210016L21Rik	1191.01	958.182	521.914
2210039B01Rik	30.7389	19.8845	17.6157
2210408F21Rik	148.323	203.637	103.013
2210408I21Rik	319.204	160.816	309.288
2300009A05Rik	25.6906	32.6297	42.7947
2310001H17Rik	70.7712	14.1769	86.776
2310002L09Rik	1510.24	0	0.878731
2310009A05Rik	1268.55	1087.88	185.37
2310009B15Rik	383.838	292.637	90.499
2310010J17Rik	11.2681	25.7561	23.6725
2310011J03Rik	1104.22	1354.83	785.05
2310015A10Rik	158.162	95.5013	236.522
2310020H05Rik	4.99163	0.946822	5.20971
2310022A10Rik	3595.47	1406.13	1119.88
2310022B05Rik	1862.32	361.393	461.879
2310030G06Rik	67.6248	131.562	102.105
2310033P09Rik	199.012	400.652	418.109
2310035C23Rik	923.892	749.146	845.067
2310036O22Rik	269.285	400.574	417.528
2310039H08Rik	260.131	265.565	266.369
2310040G24Rik	8.52849	3.5415	128.211
2310043L19Rik	182.248	0	19.8231
2310057M21Rik	1451.51	1344.89	1288.22
2310061I04Rik	353.121	308.803	140.368
2310068J16Rik	8.12987	9.66007	6.157
2410002F23Rik	1533.84	1419.38	7996.67
2410004B18Rik	150.548	166.55	326.814
2410004I01Rik	4.91881	27.0721	99.2681
2410004P03Rik	10.4628	22.8961	4.85201
2410006H16Rik	3688.09	3839.8	8564.98
2410015M20Rik	7117.35	4705.44	1928.23
2410016O06Rik	75.9165	137.969	208.929
2410021H03Rik	7.17081	5.51882	16.1351
2410089E03Rik	590.658	786.402	1192.39
2410131K14Rik	904.884	658.962	513.125
2500002B13Rik	481.793	53.9574	24.9668
2500004C02Rik	312.403	560.774	197.695
2510002D24Rik	464.752	573.032	530.156
2510009E07Rik	257.335	663.645	485.708
2510039O18Rik	484.882	520.143	273.314
2610001J05Rik	4503.02	4442.58	1259.87
2610002M06Rik	1180.04	975.583	658.243
2610005L07Rik	165.825	169.867	329.951
2610008E11Rik	2070.89	1065.2	593.082
2610016A17Rik	47.3244	112.262	41.0734
2610020C07Rik	65.4597	112.942	198.671
2610020H08Rik	207.215	552.6	124.2
2610027K06Rik	0.455255	8.66976	1.32358
2610035D17Rik	0.455255	77.619	122.658
2610044O15Rik8	871.339	720.138	130.463
2610301B20Rik	1508.5	982.223	794.729
2610306M01Rik	370.536	267.153	62.0047
2610307P16Rik	277.207	80.4969	1921.11
2610507B11Rik	2520.09	3357.07	4541.55
2610507I01Rik	16.5451	4.13911	30.9991
2610524H06Rik	174.388	308.357	40.3126
2700038G22Rik	71.4691	183.498	1719.4
2700046G09Rik	10.301	12.3317	11.7723
2700049A03Rik	723.256	1392.14	765.083
2700060E02Rik	7184.5	6671.48	3947.79
2700062C07Rik	912.848	1366.62	393.514
2700081O15Rik	508.358	427.282	1082.3
2700094K13Rik	2230.37	8729.47	475.444
2700097O09Rik	1386.28	1330.68	521.277
2700099C18Rik	71.6552	632.521	133.641
2810001G20Rik	317.791	258.448	46.5993
2810002D19Rik	469.27	203.617	407.745
2810004N23Rik	5455.04	4073.3	579.191
2810006K23Rik	1283.08	958.404	153.467
2810013P06Rik	312.338	338.382	767.446
2810021J22Rik	515.542	429.123	122.022
2810025M15Rik	2583.3	2245.66	535.592
2810029C07Rik	125.967	25.4578	33.6488
2810047C21Rik1	37.5515	6.33438	45.8246
2810403A07Rik	1225.72	1836	6618.94
2810403D21Rik	124.006	130.84	83.9122
2810408I11Rik	147.677	614.878	64.6244
2810410L24Rik	8.12987	18.5028	13.6597
2810417H13Rik	843.582	11630.6	311.818
2810428I15Rik	1866.33	1679.37	563.761
2810433D01Rik	47.6885	2.98936	13.1558
2810442N19Rik	0	5.34291	0.871343
2810454H06Rik	50.9584	26.1408	68.9102
2810468N07Rik	312.853	131.517	287.726
2810474O19Rik	8514.92	7570.69	8150.22
2900005J15Rik	32.2988	139.934	119.929
2900009J06Rik	14.9749	10.6921	3.06142
2900026A02Rik	439.525	277.011	901.339
2900041M22Rik	6.82883	8.91439	48.6624
2900057B20Rik	11.2519	1.15651	16.7752
2900060B14Rik	10.3738	1.87338	115.724
2900076A07Rik	330.233	114.319	140.903
2900097C17Rik	65861.2	50846.6	51954.8
3000002C10Rik	0.894329	10.3414	195.022
3010001F23Rik	41.8533	37.5726	63.7038
3010026O09Rik	700.8	799.688	446.669
3110001I22Rik	142.459	149.881	750.353
3110002H16Rik	1873.2	1778.15	1739.71
3110009E18Rik	403.145	337.052	81.3975
3110021A11Rik	0	3.50214	59.039
3110039I08Rik	2317.14	3790.43	2550.61
3110040N11Rik	1437.22	1170.43	93.2022
3110043O21Rik	1042.47	848.431	1435.74
3110045C21Rik	6.27648	0.919803	40.2519
3110056K07Rik	282.433	206.43	562.995
3110062M04Rik	75.0141	106.773	63.7663
3110082I17Rik	436.901	913.622	320.704
3200001D21Rik	2.27628	1.3013	3.48664
3300002I08Rik	23.4305	24.4539	5.25253
3300005D01Rik	36.6249	3.01375	34.4511
3425401B19Rik	114.739	0.946822	1.31134
3830406C13Rik	2312.45	2348.41	1081.47
3830408C21Rik	65.1058	61.2348	59.9984
3930402G23Rik	0	0.535674	121.184
4632404H12Rik	106.981	40.9749	67.4727
4632415L05Rik	100.039	228.394	234.805
4632427E13Rik	143.663	128.176	479.571
4732471J01Rik	29.4864	7.94024	72.896
4732491K20Rik	459.246	97.6423	44.5433
4831440E17Rik	0	29.3174	53.924
4833417C18Rik	21.6419	34.9003	134.211
4833418N02Rik	6.73983	2.80553	13.2236
4833419F23Rik	0	16.441	19.7647
4833420G17Rik	210.07	447.968	3294.37
4833422C13Rik	6.37357	0.236706	117.592
4833439L19Rik	10492.2	6829.19	13079.3
4921504A21Rik	7.73934	26.1349	9.09099
4921511C10Rik	2.24391	3.22343	54.5767
4921524J17Rik	7750.18	3452.43	2742.9
4921531C22Rik	56.7796	96.8676	522.15
4921536K21Rik	12.0896	27.6834	11.4317
4930402H24Rik	1960.56	1632.79	1614.59
4930404I05Rik	0	8.80833	38.9617
4930404N11Rik	2.71535	1.62316	5.30909
4930415O20Rik	1.34149	0.236706	2.19007
4930427A07Rik	29.8365	229.849	22.8152
4930429B21Rik	74.4515	62.9315	2.64843
4930430F08Rik	824.909	588.994	414.085
4930432K21Rik	53.7223	58.2897	42.5023
4930453N24Rik	1651.85	1089.16	1487.5
4930465K10Rik	9.40663	0.473411	6.20387
4930473A02Rik	0.455255	0.710117	3.04791
4930478L05Rik	8.04896	2.52946	36.8906
4930480K23Rik	41.6488	33.7024	3.90702
4930481A15Rik	104.885	51.2784	126.008
4930486L24Rik	0	23.1354	90.2382
4930503L19Rik	403.4	998.788	247.244
4930506C21Rik	4.0973	7.41132	16.6467
4930511M06Rik	17.0084	0.236706	1.32485
4930512B01Rik	2.252	0.689852	4.77836
4930520O04Rik	11.6263	30.2882	13.4171
4930523C07Rik	3.18679	1.79381	455.167
4930528A17Rik	15.4787	53.7799	7.47088
4930538K18Rik	3.64204	6.3235	8.39498
4930539J05Rik	0.447164	3.33182	9.19014
4930549G23Rik	1.34149	3.79551	18.6969
4930550C14Rik	43.6074	131.217	60.9094
4930556M19Rik	8.11369	82.1195	30.1069
4930565N06Rik	8.99992	6.59398	24.2459
4930577N17Rik	1.82102	3.01934	13.3491
4930578M01Rik	7.73934	0.298969	0.871343
4930579G18Rik	2.252	1.3013	14.0498
4930579G24Rik	472.24	1159.94	1247.78
4930579J19Rik	0	0.940067	16.6671
4930579K19Rik	89.469	21.7106	43.7383
4930581F22Rik	17.8947	18.4037	128.023
4931403G20Rik	3.18679	2.71361	10.9774
4931406C07Rik	370.385	476.427	110.812
4931406H21Rik	25.4884	69.4575	140.703
4931406P16Rik	2210.46	1951.65	5098.66
4931414P19Rik	266.723	293.091	60.9725
4931428F04Rik	764.568	394.921	114.608
4931431C16Rik	24.5514	5.23105	58.2325
4932413F04Rik	0	5.49361	0.884848
4932416H05Rik	18.1293	29.054	100.231
4932438A13Rik	1491.51	1198.79	6581.41
4932438H23Rik	4.55255	37.6213	289.927
4933400F21Rik	0.91051	8.98161	22.4137
4933402D24Rik	0.447164	4.89651	1.77097
4933403O08Rik	17.8947	14.5609	16.4528
4933404O12Rik	140.438	396.78	116.178
4933406M09Rik	0	1.17677	14.2192
4933407K13Rik	398.105	548.619	597.287
4933412E12Rik	360.794	260.757	363.997
4933417D19Rik	20.8204	8.04893	12.9845
4933421O10Rik	36.2343	19.5863	66.5995
4933427D14Rik	312.195	585.775	562.327
4933428G20Rik	10.4709	2.92067	18.3471
4933431E20Rik	95.0453	214.795	139.59
4933433H22Rik	5.46306	22.9045	15.5033
4933434E20Rik	23732.8	12430.2	9759.63
4933439C10Rik	58.0704	97.6489	137.114
5031414D18Rik	47.3002	7.57458	70.5826
5031425E22Rik	31.5361	22.1906	309.267
5031426D15Rik	57.6842	18.3212	104.683
5031434C07Rik	21.5367	0	76.3385
5031439G07Rik	319.614	417.568	635.345
5430402O13Rik	4.47164	0.919803	16.285
5430403N17Rik	11.8366	4.36906	7.0714
5430405H02Rik	57.34	44.3907	36.2387
5430416N02Rik	210.312	375.567	1462.57
5430431A17Rik	261.718	1.89924	532.544
5530601H04Rik	312.986	491.889	319.129
5730408K05Rik	118.387	368.073	239.571
5730409E04Rik	21.0976	69.9524	23.7505
5730420D15Rik	5.00781	0.597937	24.259
5730455P16Rik	2051.74	2068.41	1842.56
5730507C01Rik	0.894329	0.926558	3.05888
5730508B09Rik	65.1441	8.27149	95.2895
5830417I10Rik	464.315	568.047	242.489
5830454E08Rik	4.55255	23.7559	33.1294
5930430L01Rik	55.0476	70.3206	377.987
6030443J06Rik	38.1524	47.8798	0.884848
6030458C11Rik	608.907	503.198	1122.43
6230400D17Rik	20.7233	21.7882	30.8073
6330408A02Rik	99.8266	84.478	56.5285
6330416G13Rik	127.702	162.094	196.854
6330418K02Rik	41.6246	53.2757	6.15215
6330549D23Rik	17.1622	51.2953	42.5568
6430531B16Rik	25.2111	6.39432	14.6111
6430548M08Rik	190.681	210.675	1942.63
6430550D23Rik	21.5124	22.7976	45.9091
6720489N17Rik	70.7086	244.529	80.2998
6820431F20Rik	3111.23	3842.36	7513.96
8030462N17Rik	374.813	117.716	548.312
8430408G22Rik	92.6337	0.597937	1514.27
8430429K09Rik	322.625	360.616	269.085
9030025P20Rik	153.094	149.367	72.9155
9030617O03Rik	1879.86	3781.97	298.036
9030624G23Rik	1.35767	0.473411	1.74269
9030624J02Rik	6637.37	4927.62	2484.37
9130008F23Rik	27.9265	52.5782	239.871
9130011E15Rik	490.479	494.075	609.987
9130019O22Rik	48.6476	124.97	357.447
9130019P16Rik	42.096	50.5278	2.18142
9130023H24Rik	2411.87	1734.84	524.072
9130024F11Rik	16.6422	14.054	6.65483
9130221H12Rik	23.9343	10.9517	40.0163
9130401M01Rik	1034.12	1907	540.654
9130409I23Rik	0	9.72695	9.59089
9230110C19Rik	398.825	420.771	255.403
9230114K14Rik	689.098	727.402	177.428
9330020H09Rik	148.035	164.677	198.467
9330102E08Rik	221.058	36.6826	0.878731
9330133O14Rik	365.523	453.051	417.063
9330136K24Rik	0.447164	2.11009	6.63267
9330151L19Rik	29.5511	36.164	37.2548
9330159F19Rik	361.148	2.77967	2178.49
9330188P03Rik	200.725	197.812	30.9197
9430015G10Rik	523.282	1460	963.754
9430016H08Rik	3326.71	2539.13	980.416
9430020K01Rik	502.579	969.718	7123.64
9430037G07Rik	31.8215	63.8587	11.8396
9430038I01Rik	217.372	219.592	626.575
9430060I03Rik	64.5432	40.5662	58.3861
9430078K24Rik	24.2763	0	30.011
9430083A17Rik	32.7239	14.385	60.8897
9430091E24Rik	39.8462	27.5868	103.623
9530027J09Rik	36.0644	40.7762	281.657
9530053A07Rik	443.292	1023.05	4.89991
9530068E07Rik	5227.91	5619.75	3491.68
9530077C05Rik	9.55227	152.164	231.637
9530082P21Rik	653.949	736.839	443.777
9930012K11Rik	984.887	821.682	55.7261
9930021J03Rik	959.041	792.729	2498.96
9930104L06Rik	961.703	426.709	196.528
9930111J21Rik1	0.894329	5.18726	242.607
A130010J15Rik	692.085	682.224	160.475
A230046K03Rik	3296	2789	3147.68
A230050P20Rik	0	15.4318	140.738
A230056P14Rik	1.82102	0.298969	15.8083
A230072C01Rik	377.409	297.993	513.14
A330009N23Rik	3.58541	0	8.30656
A330023F24Rik	4.98353	42.714	211.945
A330035P11Rik	9.56036	3.70623	7.84717
A330040F15Rik	0	15.5039	30.5348
A330069E16Rik	92.3381	83.1209	124.663
A330074K22Rik	26.332	69.8778	14.7578
A430005L14Rik	3433.14	5843.44	1043.37
A430033K04Rik	431.476	259.093	91.3101
A430035B10Rik	0	7.1629	152.762
A430046D13Rik	221.758	100.415	120.247
A430078I02Rik	1.34958	13.1375	10.9257
A430105I19Rik	172.014	234.766	102.303
A4galt	213.93	468.262	344.58
A530013C23Rik	14.9263	9.45471	85.6651
A530032D15Rik	2.24391	0	18.9092
A630033H20Rik	1938.96	1252.9	88.1091
A630066F11Rik	80.4286	36.8533	6.49531
A630072M18Rik	93.5016	65.4633	436.852
A630089N07Rik	29.4702	50.2075	22.768
A730017L22Rik	48.9513	106.743	41.2193
A730056A06Rik	1.34149	0.946822	20.1755
A830010M20Rik	149.374	146.428	155.082
A830052D11Rik	86.3712	17.2409	7.4523
A830080D01Rik	248.418	678.879	2398.6
A830082N09Rik	23.2768	54.0965	16.4528
A930003A15Rik	2653.81	33.2607	21.9304
A930005H10Rik	631.888	321.982	250.204
A930006K02Rik	1.36577	0.473411	22.5999
A930012L18Rik	1.78866	0.689852	10.8337
A930013F10Rik	44.765	54.5694	252.032
A930015D03Rik	153.678	253.643	299.066
A930024E05Rik	193.067	23.6028	21.5569
AA413626	3.13015	2.39175	5.3129
AA414768	48.243	111.023	92.7929
AA415398	13.6577	26.653	44.2917
AA465934	360.448	569.222	15.8118
AA467197	0.455255	4.48453	3.52589
AA986860	38.0656	35.249	232.013
AB124611	17.057	2.78643	45.0116
AI314180	2141.9	2019.05	4387.09
AI413582	287.277	394.741	144.359
AI427809	0.91051	10.652	65.3385
AI429214	103.094	52.9602	40.3657
AI450353	406.178	717.139	1165.77
AI464131	1749.27	2789.59	596.768
AI467606	592.926	697.132	35.0936
AI504432	2.27628	9.04979	529.494
AI506816	2.252	12.2432	1388.93
AI593442	626.176	2898.88	36.3679
AI597479	2101.01	1136.83	463.553
AI607873	0	9.05707	196.288
AI662270	29.1201	6.67533	182.692
AI837181	463.132	893.587	1671.51
AI846148	358.829	202.965	269.438
AI987944	1989.33	1056.66	615.937
AK010878	928.636	850.733	941.549
AU019823	1077.21	1020.97	2115.06
AU021092	51.0717	37.4237	171.848
AU022252	295.156	165.508	54.6852
AU040320	1593.46	1226.45	686.316
AU041133	417.814	185.638	42.2115
AV039307	3.58541	2.08982	6.92792
AV051173	4.02448	2.62845	28.5245
AW146154	325.335	205.583	91.6327
AW209491	4372.81	3011.13	822.304
AW549542	0.894329	1.88013	75.7988
AW549877	2858.68	2077.62	5858.83
AW551984	5167.65	1428.6	624.675
AW554918	329.159	589.35	1277.28
AY074887	1.78866	2.37265	3.10066
Aaas	4282.23	9362.91	782.006
Aacs	3037.91	2120.79	5013.61
Aaed1	134.452	162.448	365.287
Aagab	7171.08	2669.27	1625.47
Aak1	1029.39	1177.78	1497.94
Aamdc	5240.81	1011.49	475.63
Aamp	17184.3	15023.9	20011.3
Aar2	2913.82	2736.18	3939.99
Aard	125.916	31.1966	14.4518
Aars	11926.2	5983.82	8108.22
Aars2	71.6552	273.752	259.491
Aarsd1	1252.63	1942.89	698.608
Aasdh	479.041	656.894	418.975
Aasdhppt	6668.95	5222.7	2434.89
Aatf	1348.12	1317.03	697.956
Abat	2226.59	1594.92	4839.96
Abca1	820.382	320.556	2412.77
Abca2	482.574	1242.63	1106.1
Abca3	647.035	362.496	702.507
Abca4	0	3.70623	34.9559
Abca5	943.551	483.126	5098.39
Abca7	206.614	537.925	438.418
Abca8a	0.91051	1.28779	10474.8
Abca8b	79.0143	60.6078	8588.99
Abca9	34.8788	19.5458	872.991
Abcb10	398.202	578.324	455.48
Abcb1a	0.455255	5.44423	358.855
Abcb1b	311.97	981.867	4276.81
Abcb6	4449.7	2202.86	1262.12
Abcb7	1032.49	1107.71	572.857
Abcb8	2457.6	2790.51	1620.94
Abcb9	54.4445	18.7341	4.85201
Abcc1	2620.35	5955.64	3206.66
Abcc10	167.957	263.343	625.697
Abcc4	105.721	283.659	251.719
Abcc5	2297.55	3347.02	4502.15
Abcc8	56.5612	1.24579	22.502
Abcc9	191.242	29.1027	1348.76
Abcd1	1062.62	424.859	1056.77
Abcd3	1877.74	1562.46	1513.31
Abcd4	1319.79	997.633	696.765
Abce1	12842.9	11062.5	15692.5
Abcf1	6291.69	5191.73	5431.17
Abcf2	10029.2	9861.49	15206.4
Abcf3	6385.82	3936.59	4609.2
Abcg1	1420.8	472.311	2529.99
Abcg2	8591.36	3726.23	1342.43
Abcg4	0	22.6755	47.6731
Abhd1	12.6096	9.69352	8.35319
Abhd10	539.704	741.739	859.167
Abhd11	2526.67	3422.4	4436.39
Abhd11os	24.7963	8.30674	2.21708
Abhd12	273.129	253.427	329.671
Abhd13	563.065	479.564	356.747
Abhd14a	853.586	731.261	943.153
Abhd14b	160.762	289.887	499.731
Abhd15	0.91051	1.83961	3.50372
Abhd16a	751.924	798.432	1744.74
Abhd17a	257.815	264.995	66.7362
Abhd17b	766.212	584.312	1657.42
Abhd17c	1001.07	634.314	272.979
Abhd18	224.886	122.226	280.902
Abhd2	197.527	283.427	4806.97
Abhd3	10.4709	41.1493	176.091
Abhd4	9500.07	11073.5	4072.24
Abhd5	2120.47	1520.62	2867.56
Abhd6	2099.27	1354.83	741.614
Abhd8	81.0883	244.2	61.6409
Abi1	3270.33	2724.52	7038.61
Abi2	1918.31	3695.24	3795.24
Abi3bp	0.455255	11.7152	4371.86
Abl1	1117.54	1464.13	1792.49
Abl2	714.219	369.286	2979.47
Ablim1	4529	1467.05	1852.2
Ablim2	342.555	48.2334	36.8347
Ablim3	2326.2	0.229951	751.536
Abr	1203.34	1864.78	1124.15
Abra	232.323	3.53707	27.9933
Abracl	3731.81	6816.66	1419.08
Abt1	1448.36	1875.72	2072.73
Abtb1	847.963	643.984	1014.68
Abtb2	477.712	36.9176	1334.7
Acaa1a	269.587	591.137	548.708
Acaa1b	0	12.9056	16.7973
Acaa2	4495.55	4034.31	2320.91
Acaca	797.567	1073.45	1098.88
Acacb	23.4872	72.4312	659.634
Acad10	211.051	306.864	173.712
Acad11	1470.39	1718.21	609.576
Acad12	120.337	139.957	6.58834
Acad8	2774.98	2446.12	1520.21
Acad9	2005.77	1251.75	893.676
Acadl	2919.29	2197.63	2893.69
Acadm	3843.95	2068.94	2257.6
Acads	673.059	1025.05	104.14
Acadsb	4020.84	2467.61	5460.84
Acadvl	11467.9	9650.94	17471
Acap1	0.447164	0.236706	208.527
Acap2	1525.99	1240.56	1027.48
Acap3	252.653	510.563	1082.98
Acat1	12946.1	9152.24	4369.25
Acat2	12128.1	3041.3	2147.26
Acat3	1.79675	16.514	20.2218
Acbd3	1455.86	1150.53	2344.37
Acbd4	344.999	346.35	1716.79
Acbd5	2238.25	1344.96	1122.7
Acbd6	254.31	220.635	356.126
Acbd7	17.5203	19.743	9.22707
Accs	298.104	673.498	155.427
Acd	1801.35	3002.4	2707.78
Ace	18.1536	12.4703	1741.49
Ace2	0	13.4247	197.084
Acer2	15.6508	15.4943	819.674
Acer3	792.037	1827.12	1778.72
Ache	85.9542	9.70587	93.5545
Acin1	370.741	664.711	1395.62
Ackr3	1834.92	1208.32	33797
Ackr4	63.0237	53.6343	23.8243
Acly	15318.8	7991.61	7838.77
Aco1	3539.01	3328.14	2903.96
Aco2	33008.4	23647.6	9120.41
Acot1	37.3897	85.5607	32.8278
Acot10	66.8195	43.623	53.0673
Acot11	809.789	242.92	105.283
Acot13	3461.5	1903.79	492.541
Acot2	1730.84	2492.97	1727.97
Acot4	0	40.4343	27.7007
Acot6	15.3816	6.46566	2.21708
Acot7	3222	5141.93	633.872
Acot8	865.117	569.165	526.049
Acot9	11845.2	8410.95	10219.5
Acox1	6577.35	3284.34	6302.56
Acox3	1384.05	976.479	926.132
Acp1	11064.4	11620.6	2635.81
Acp2	2783.05	2788.89	1607.36
Acp5	0	77.6807	157.212
Acp6	2835.02	1335.54	2409.45
Acrbp	108.867	96.4368	150.851
Acsbg1	3.64204	53.9342	103.032
Acsf2	178.224	322.07	329.923
Acsf3	366.368	792.638	227.394
Acsl1	1621.38	838.467	1664.87
Acsl3	10414.8	872.893	3246.96
Acsl4	34985.3	8156.24	12440.9
Acsl5	688.846	1441.04	692.763
Acsl6	169.679	0	95.0684
Acss2	320.541	112.812	279.137
Acss3	0.447164	5.9056	448.302
Acta1	1.11212e+06	2147.21	7065.66
Acta2	52827.1	5153.25	9766.11
Actb	180263	532421	461920
Actc1	296002	172.06	555.591
Actg1	167453	282434	376679
Actg2	148.381	41.4342	49.3561
Actl6a	4830.73	7832.16	3049.75
Actn1	5899.69	5852.43	3385.67
Actn2	73804.5	125.912	235.257
Actn3	13526.1	36.7012	4388.16
Actn4	9121.04	17399.5	45059
Actr10	12994.4	9685.57	8842.33
Actr1a	7839.4	6398.19	8236.16
Actr1b	3548.36	3515.24	5062.33
Actr2	52553	53564.9	19140.3
Actr3	6394.52	6507.55	5316.07
Actr5	37.8369	103.027	79.3811
Actr6	2899.54	3078.66	625.85
Actr8	1842.51	1629.2	1041.45
Acvr1	364.851	462	1570.61
Acvr1b	41.487	18.9509	157.655
Acvr1c	0	14.1995	8.28209
Acvr2a	2214.59	467.133	1299.46
Acvr2b	183.048	407.601	420.565
Acvrl1	1.78866	7.83183	638.743
Acy1	646.013	1058.56	686.658
Acy3	199.311	211.43	251.058
Acyp1	1398.41	1020.61	347.945
Acyp2	488.599	257.851	346.531
Ada	51.2599	91.6214	459.676
Adal	870.244	312.97	466.975
Adam10	9092.39	10163.7	4759.2
Adam11	18.6331	27.8097	106.015
Adam12	55.0616	107.837	215.518
Adam15	299.377	339.02	907.598
Adam17	1661.44	2231.06	1997.14
Adam19	4887.06	1258.53	1158.89
Adam1a	106.036	45.9082	199.763
Adam22	633.519	243.729	2786.89
Adam23	984.666	1552.7	47.7798
Adam32	0.455255	28.366	3.0785
Adam5	58.8698	41.0711	94.433
Adam8	237.308	376.094	603.702
Adam9	3660.98	9949.83	3052.76
Adamts1	1557.76	1002.2	29362.8
Adamts10	369.994	1118.28	15338.1
Adamts12	114.923	253.538	366.579
Adamts14	2024.61	381.895	645.504
Adamts2	87.3001	16.0746	139.563
Adamts20	591.836	0	1015.98
Adamts3	0.455255	70.4281	502.931
Adamts4	360.177	75.7992	14944.1
Adamts5	7248.76	3344.37	4759.15
Adamts6	29.5026	59.5902	135.914
Adamts7	780.397	607.824	539.952
Adamts8	0	5.56875	353.251
Adamts9	51.9498	81.8318	719.351
Adamtsl1	288.343	249.642	1958.8
Adamtsl2	33.2336	35.815	60.4495
Adamtsl3	2989.72	4146.05	730.403
Adamtsl4	60.4357	155.785	2981.66
Adamtsl5	252.841	270.685	66.8137
Adap2	0	5.88386	116.343
Adar	597.76	598.257	1068.88
Adarb1	12.7067	360.106	10237
Adat1	431.555	382.903	127.138
Adat2	1147.75	1274.81	69.4038
Adat3	32.3334	76.3607	260.86
Adck1	1240.31	856.773	430.526
Adck2	215.444	350.954	440.19
Adck5	1139.8	1830.81	767.135
Adcy1	81.0074	134.021	9.21253
Adcy2	69.0796	38.5713	1585.15
Adcy3	12.5611	49.6327	92.209
Adcy6	451.303	566.005	683.077
Adcy7	706.192	1624.84	4885.42
Adcy9	130.721	267.858	493.008
Add1	6342.54	6862.19	3883.2
Add3	746.027	488.652	3489.8
Adgra2	73.0879	165.028	276.872
Adgra3	2032.84	5419.3	1869.37
Adgre5	1638.25	830.403	4611.68
Adgrf2	0	32.5021	112.993
Adgrf4	0	159.437	6.96232
Adgrf5	1.36577	62.726	3057.4
Adgrg1	83.6963	210.564	6273.51
Adgrg2	145.759	21.5257	263.272
Adgrg6	579.894	1.42023	143.601
Adgrl1	315.675	473.794	1494.9
Adgrl2	1963.82	1804.9	817.655
Adgrl3	242.158	0	101.685
Adgrl4	34.8788	0.236706	2485.75
Adh1	16.5532	22.6839	5759.85
Adh5	14551.4	12813.6	3089.42
Adhfe1	31.9186	9.59685	125.903
Adi1	869.946	979.996	280.813
Adipor1	2895.05	3247.98	5001.89
Adipor2	782.813	561.188	1404.34
Adk	6748.49	9352.22	6085.36
Adm	192.237	1076.74	2051.49
Adnp	0.447164	0.834643	0.871343
Adnp2	522.064	658.662	1638.92
Ado	20057.1	31360	17164.2
Adora1	290.211	158.834	68.2495
Adora2a	46.155	13.0312	47.3013
Adora2b	59.0559	20.2418	209.367
Adpgk	171.729	253.827	319.228
Adprh	11109.2	5179.45	1485.67
Adprhl2	219.484	386.546	202.557
Adprm	1393.38	1163.3	460.222
Adra1b	16.3649	17.3007	19.1339
Adra2a	0	185.721	15.4147
Adrb1	12.1786	8.63652	18.3583
Adrb2	419.127	661.125	6579.55
Adrb3	7.28408	0.229951	5.33864
Adrbk1	448.847	864.265	2049.44
Adrm1	6860.5	5994.06	7245.5
Adsl	7471.25	8532.69	2078.07
Adss	1164.8	3111.08	6329.37
Adssl1	2803.31	141.239	92.3357
Aebp1	2360.79	3031.5	1382.17
Aebp2	2973.95	4738.81	7562.92
Aen	3661.86	5650.34	3447.14
Aes	905.633	1651.38	489.487
Afap1	13908.7	9103.95	8289.66
Afap1l1	4342.5	165.897	860.483
Afap1l2	684.991	104.1	187.59
Aff1	322.479	170.123	2325.02
Aff2	51.4644	37.4964	80.8925
Aff3	4.47164	25.3768	120.262
Aff4	3576.82	2765.9	8784.98
Afg3l1	1106.05	1479.77	610.629
Afg3l2	959.896	842.035	1256.85
Afmid	339.334	331.794	553.688
Aftph	743.539	620.991	2281.3
Aga	2511.32	2419.19	1168.48
Agap1	936.347	625.696	2314.58
Agap3	132.892	360.029	525.068
Agbl2	274.689	267.171	42.5244
Agbl3	115.461	71.2649	54.982
Agbl5	108.266	545.694	87.1156
Ager	1.34958	20.7915	31.1572
Agfg1	1186.9	1087.57	1196.34
Agfg2	192.798	281.406	260.753
Aggf1	669.67	532.822	843.953
Agk	2788.52	3769.03	1298.62
Agl	1499.71	547.172	485.096
Ago1	481.943	701.318	419.887
Ago2	2247.99	1029.08	3287.89
Ago3	264.558	568.861	1816.75
Ago4	317.67	199.112	167.442
Agpat1	454.421	478.5	156.962
Agpat2	266.003	1455.85	841.322
Agpat3	2568.19	1165.13	1516.95
Agpat4	3831.23	2804.63	1176.68
Agpat5	1697.87	2376.36	6189.69
Agpat9	131.644	47.45	1352.1
Agps	2126.77	1909.49	847.347
Agrn	1145.21	1132.51	1311.95
Agtpbp1	727.216	1009.05	817.17
Agtr1a	29.3731	2.13035	140.646
Agtrap	275.039	478.847	554.758
Ahctf1	1320.41	1972.77	6020.44
Ahcy	861.36	1517.18	2145.78
Ahcyl1	2339.82	4654.02	6712.92
Ahcyl2	415.959	319.135	1415.6
Ahdc1	192.1	236.488	681.534
Ahi1	530.059	933.929	1472.29
Ahnak	18472.1	15721	56478.9
Ahr	476.818	1485.29	2101.07
Ahrr	42.7616	728.115	0.878731
Ahsa1	6262	6915.67	5658.45
Ahsa2	1781.75	1012.23	1473.8
Aif1l	12521.7	5961.99	2947.44
Aifm1	6572.37	5174.53	1402.94
Aifm2	1230.52	1237.73	435.586
Aig1	614.989	418.501	387.372
Aim1	128.346	306.623	2366.76
Aimp1	7417.74	5769.32	2549.45
Aimp2	8193.24	6028.06	2649.03
Aip	5495.56	4853.97	2276.86
Airn	215.296	72.1519	1301.03
Ajuba	294.749	460.184	34.1182
Ak1	41922.2	17170.6	926.277
Ak2	1129.33	2241.43	2107.51
Ak3	1947.83	1202.16	1707.89
Ak4	5.00781	11.9504	175.188
Ak5	216.017	565.182	2.62142
Ak6	2079.21	2175	879.37
Akap1	1594.85	936.46	567.591
Akap10	327.912	456.929	533.976
Akap11	1485.9	1813.42	1407.38
Akap12	116.366	31.1142	3916.99
Akap13	4214.77	1681.39	6642.21
Akap17b	157.164	178.621	125.558
Akap5	286.557	60.001	233.13
Akap6	1263.45	172.438	167.286
Akap7	138.922	261.903	239.89
Akap8	3403.55	4365.52	4203.24
Akap8l	408.983	253.507	1595.3
Akap9	2458.01	1352.97	4950.02
Akip1	1551.67	1039.07	458.431
Akirin1	1188.4	458.725	1162.52
Akirin2	732.585	659.854	502.254
Akna	10.7805	303.67	693.695
Aknad1	264.114	0	6.60208
Akr1a1	60761	42463.9	16612.6
Akr1b10	2603.1	1954.56	360.487
Akr1b8	11490.8	5912.31	1200.17
Akr1c13	130.468	113.785	15.172
Akr1c14	32.643	50.7696	259.343
Akr1e1	2946.25	1602.45	712.135
Akr7a5	84.6715	264.771	132.71
Akt1	3468.55	3099.66	1964.17
Akt1s1	91.6644	100.899	82.8488
Akt2	18892.6	4715.79	21955.4
Akt3	431.1	528.214	883.237
Aktip	2586.6	1197.09	1453.02
Alad	1651.81	4954.98	1312.17
Alas1	5458.63	3467.36	7558.02
Alas2	3.63395	5.15348	917.451
Alcam	180.832	898.844	103.969
Aldh16a1	219.778	540.081	492.387
Aldh18a1	2865.52	1813.69	993.733
Aldh1a1	28.2258	0.597937	976.277
Aldh1b1	18.6655	13.797	49.6612
Aldh1l1	261.228	62.7277	365.775
Aldh1l2	491.25	54.4017	27.9454
Aldh2	1174.72	4822.18	4565.12
Aldh3a1	800.796	349.773	1676.41
Aldh3a2	2840.11	1824.85	1752.77
Aldh3b1	1439.46	1737.46	1141.37
Aldh4a1	1919.11	1305.84	1571.96
Aldh5a1	21.1624	121.468	7.00745
Aldh6a1	1822.97	1100.13	6816.25
Aldh7a1	1401.3	1348.04	1725.99
Aldh9a1	2096.9	2689.02	1072.45
Aldoa	193754	118015	73843.6
Aldoart1	140.435	101.688	75.0227
Alg1	601.056	557.98	338.878
Alg10b	733.874	421.852	190.616
Alg11	11508.8	10000.1	6139.49
Alg12	507.716	789.699	269.547
Alg13	283.936	381.569	764.964
Alg14	1507.21	1348.35	765.674
Alg2	1640.49	1511.82	261.204
Alg3	2636.32	2734.68	743.367
Alg5	3097.1	3242.26	1167.9
Alg6	560.967	1055.15	805.223
Alg8	984.473	1449.78	373.848
Alg9	426.759	329.254	166.49
Alkbh1	705.349	920.565	2412.55
Alkbh2	124.884	237.121	72.3901
Alkbh3	3629.49	1480.45	1105.55
Alkbh4	1044.84	497.604	348.062
Alkbh5	5282.23	7790.98	13953.3
Alkbh6	958.321	859.87	1170.69
Alkbh7	755.196	587.861	195.763
Alkbh8	1853.06	1593.01	530.504
Alms1	116.078	326.391	334.717
Alox5ap	0	9.91588	361.044
Aloxe3	0	8.75839	492.662
Alpk1	283.204	113.305	1273.85
Alpk3	3431.02	56.2337	917.626
Alpl	36.6675	87.8431	5064.7
Als2	1378.96	817.478	1292.14
Als2cl	46.3308	521.644	403.524
Alyref	360.62	1036.41	755.257
Alyref2	106.006	96.1298	86.1136
Amacr	542.247	511.929	348.093
Ambra1	826.357	1014.2	1560.99
Amdhd2	638.014	1059.26	299.036
Amer1	660.846	917.246	433.993
Amfr	2231.4	2110.77	5242.91
Amhr2	18.8214	8.75839	11.4013
Amigo1	185.976	34.0496	221.224
Amigo2	60.3628	275.939	110.795
Amigo3	16.2921	27.9106	65.6323
Ammecr1	709.033	147.255	49.3736
Ammecr1l	2221.12	3016	7023.75
Amn1	2422.64	1200.72	521.184
Amot	1163.28	414.417	422.812
Amotl1	11343.5	4144.06	4156.07
Amotl2	2177.42	980.138	2654.56
Ampd1	179.829	8.96906	66.2026
Ampd2	2007.68	2604.71	3270.93
Ampd3	5477.49	5465.09	12400.1
Amy1	1.79675	0	206.334
Amz2	3609.36	2398.5	1596.81
Anapc1	4177.76	7387.67	3034.96
Anapc10	4060.31	2754.19	1506.64
Anapc11	7647.43	6696.21	2863.33
Anapc13	2244.3	1625.41	508.694
Anapc15	928.804	1657.14	248.325
Anapc16	3835.8	2598.97	2382.28
Anapc2	2277.3	2823.32	2704.13
Anapc4	5721.89	4780.45	1482.94
Anapc5	4346.26	5596.62	10925.6
Anapc7	1383.39	1247.62	1616.06
Ang	21.1866	21.845	109.993
Angel1	161.337	272.059	316.51
Angel2	1271.5	1697.55	5378.38
Angpt1	938.385	63.5391	415.454
Angpt2	326.605	109.85	546.703
Angptl2	5388.74	2475.93	3666.24
Angptl4	55.08	60.9194	7976.34
Angptl6	107.592	50.7832	46.5159
Angptl8	1.34149	0.926558	2.63619
Ank	2866.48	1222.53	1754.22
Ank1	1793.8	1278.15	867.839
Ank2	466.182	123.495	2579.93
Ank3	2032.27	2241.14	10300.4
Ankdd1b	17.9998	20.9053	27.4685
Ankfy1	3588.26	4586.31	3480.94
Ankhd1	1524.17	2103.91	4595.21
Ankib1	827.401	912.585	984.477
Ankle1	0	117.584	26.3386
Ankle2	2167.05	2662.76	1947.02
Ankmy2	1860.3	1983.09	633.869
Ankra2	332.129	231.676	287.503
Ankrd1	76590.6	10602.6	16886.5
Ankrd10	3093.77	2097.67	6717.11
Ankrd11	1339.83	1755.13	4685.68
Ankrd12	1313.4	1254.36	3444.77
Ankrd13a	595.935	589.741	1556.92
Ankrd13b	137.925	67.963	75.8382
Ankrd13c	544.715	502.177	1607.22
Ankrd13d	67.8293	101.559	161.031
Ankrd16	466.185	427.676	738.081
Ankrd17	6504.64	5584.23	9160.95
Ankrd2	19307.7	9.96894	81.5195
Ankrd23	14679.8	493.159	1038.04
Ankrd24	55.2094	134.83	28.1269
Ankrd26	316.769	980.742	726.334
Ankrd27	1297.58	2446.92	2927.57
Ankrd28	1457.74	1354.65	14842.6
Ankrd29	0.894329	174.749	2803.67
Ankrd33b	21.308	14.0878	815.121
Ankrd37	46.0719	44.266	120.469
Ankrd39	528.611	329.752	190.581
Ankrd40	1282.88	1660	1228.42
Ankrd42	38.9335	37.2148	71.4704
Ankrd44	1266.12	141.387	191.922
Ankrd46	3900.96	3646.27	2349.12
Ankrd49	1589.22	1356.48	920.127
Ankrd50	736.265	429.391	512.81
Ankrd52	382.351	289.466	466.483
Ankrd54	112.179	191.49	265.91
Ankrd55	0.455255	8.50818	12.1695
Ankrd6	123.648	71.7053	92.1911
Ankrd61	3.64204	0.229951	36.7555
Ankrd9	12.6743	33.3901	58.9467
Anks1	106.251	424.206	517.123
Anks1b	60.885	156.068	13.4834
Anks3	1069.6	927.739	1493.23
Anks6	0	81.1823	70.3167
Ankzf1	580.828	434.112	352.199
Anln	794.615	9576.2	398.658
Ano1	233.658	413.115	587.863
Ano10	3309.67	2343.04	1464.83
Ano5	700.251	152.173	655.58
Ano6	2958.69	3302.32	14969.8
Ano8	0.455255	2.10333	1.75619
Anp32a	322.996	1020.64	352.744
Anp32b	1635.34	3091.01	1950.67
Anp32e	6028.08	4753.42	6352.99
Anpep	819.185	898.019	457.301
Antxr1	1464.66	2747.36	2288.14
Antxr2	1344.52	1600.61	3089.02
Anxa1	63561.7	99448	36574.7
Anxa11	6200.08	2937.21	7820.23
Anxa2	99580.9	109957	51107.1
Anxa3	11770	6151.43	2130.02
Anxa4	8217.36	10618.2	7467.67
Anxa5	27390.5	26381.6	76815.7
Anxa6	28128.3	28942.8	33409.7
Anxa7	5940.34	5535.48	4546.12
Anxa8	1760.42	1749.63	34.519
Anxa9	2.27628	52.8108	9.97711
Aoc2	267.922	277.497	315.119
Aox1	832.76	742.991	1880.47
Aox3	3.18679	191.728	130.656
Ap1ar	253.884	290.083	381.467
Ap1b1	3859.41	3390.4	3169.11
Ap1g1	2722.18	2519.56	4539.19
Ap1g2	517.633	735.342	643.072
Ap1m1	8287.88	7602.96	5454.76
Ap1s1	4445.54	6048.85	832.68
Ap1s2	677.747	1218.83	730.383
Ap1s3	11.1872	46.1357	4.33963
Ap2a1	298.816	423.549	424.866
Ap2a2	2442.42	2113.91	1865.4
Ap2b1	3276.68	3146.86	4121.93
Ap2m1	51082.6	43864.6	38417.1
Ap2s1	1213.21	1509.18	549.144
Ap3b1	2104.07	1550.27	2265.05
Ap3d1	1639.29	1706.96	2089.92
Ap3m1	6697.7	4446.57	1865.31
Ap3m2	773.34	362.674	698.157
Ap3s1	747.454	1038.87	701.48
Ap3s2	4015.05	3012.11	691
Ap4b1	601.017	508.695	940.257
Ap4e1	1079.09	820.246	594.313
Ap4m1	454.38	753.124	242.274
Ap4s1	323.024	285.582	322.916
Ap5b1	5.40643	31.8785	135.87
Ap5m1	1214.79	814.838	549.942
Ap5s1	1057.33	1291.23	175.99
Ap5z1	249.741	549.035	375.376
Apaf1	1103.27	1309.43	803.522
Apba1	3.13824	28.7303	61.256
Apba3	334.369	495.277	1430.3
Apbb1	2814.07	840.582	591.978
Apbb1ip	78.7694	205.848	47.5123
Apbb2	4709.94	3577.37	3818.27
Apbb3	179.905	313.829	1034.58
Apc	3210.67	2219.97	5297.31
Apc2	15.7236	64.7453	21.5031
Apcdd1	7.16272	0	62.7399
Apeh	1909.14	1974.6	645.82
Apex1	15025.9	14635.5	4093.27
Apex2	872.55	807.621	669.984
Aph1a	731.525	1172.38	801.459
Aph1b	858.063	854.428	800.444
Aph1c	94.315	18.2352	183.513
Api5	4189.15	6377.98	10500.1
Apip	3252.7	3209.08	477.142
Apitd1	125.363	492.353	57.2989
Aplf	242.201	396.695	134.293
Apln	0	89.9832	5.25149
Aplnr	0.447164	0.236706	195.311
Aplp1	63.3069	23.9303	86.3418
Aplp2	5758.9	8602.67	21070.1
Apmap	689.946	1100.49	1186.68
Apoa1	0	1.96825	45.7043
Apoa1bp	3542.94	3720.94	1391.35
Apob	0	51.5915	3.04179
Apobec1	132.249	12.0703	1003.17
Apobec2	1182.27	2.56323	44.5474
Apobec3	575.153	960.537	525.734
Apobr	10.4709	64.06	42.0821
Apod	4.0973	10.7629	2349.32
Apoe	100.298	137.235	35156.2
Apol6	63.7298	0	124.97
Apol9a	26.0731	15.0478	29.7688
Apol9b	31.1699	15.3453	36.0904
Apoo	1065.09	790.996	162.429
Apool	11242.1	2634.36	439.686
Apopt1	2857.86	1729.24	773.125
App	4045.02	3175.19	5916.87
Appbp2	1159.17	894.959	1808.89
Appl1	1982	1592.95	3877.13
Appl2	703.288	659.057	3015.22
Aprt	11714.2	14724.6	5612.33
Aptx	2769.59	2176.17	1114.7
Aqp7	6.36548	0.473411	1290.62
Aqr	9772.77	3069.72	2081.93
Ar	15.9258	68.4584	3834.57
Araf	10547.2	6401.44	4127.43
Arap1	352.577	1178.17	1070.98
Arap2	535.246	900.166	95.5565
Arc	95.9116	156.383	4254.94
Arcn1	3621.73	4161.9	10905.5
Areg	77.3492	161.845	94.2978
Arel1	2441.9	1765.45	904.603
Arf1	31397	26483.4	35774.9
Arf2	3687.14	1910.01	4593.94
Arf3	2398.56	1823	1079.82
Arf4	22696.2	19667.7	61393.2
Arf5	239.165	264.031	836.364
Arf6	4736.41	7607.91	4261.93
Arfgap1	619.102	621.338	1346.48
Arfgap2	2132.62	1796.16	2450.36
Arfgap3	5515.01	1807.66	3192.2
Arfgef1	2831.32	1889.57	2035.52
Arfgef2	583.125	802.644	880.003
Arfip1	2642.8	1985.3	4259.43
Arfip2	641.268	630.395	993.347
Arfrp1	1250.99	1337.84	1575.01
Arg1	0.447164	10.626	245.781
Arg2	0	36.0824	351.429
Arglu1	10037.9	19992.3	29498.2
Arhgap1	14784.7	12397.8	5588.04
Arhgap10	550.741	454.752	157.919
Arhgap11a	270.007	1075.49	105.229
Arhgap12	1639.28	1176.29	2263.08
Arhgap17	626.484	1014.17	3818
Arhgap18	903.137	411.193	2227.53
Arhgap19	241.373	1774.24	264.724
Arhgap21	861.777	1657.85	3577.75
Arhgap22	92.9249	68.9049	579.345
Arhgap23	442.169	141.091	1024.32
Arhgap24	1057.74	97.2226	9379.84
Arhgap26	29.4136	100.297	753.093
Arhgap27	44.1215	64.913	73.6947
Arhgap28	7917.87	979.95	2166.65
Arhgap29	2812.41	3711.46	4864.22
Arhgap31	49.1374	32.9523	1297.06
Arhgap32	506.682	366.827	364.982
Arhgap33	180.274	228.252	45.8727
Arhgap35	1884.84	2192.21	2539.1
Arhgap39	45.7542	27.2057	96.7265
Arhgap4	7.73934	8.97483	144.513
Arhgap42	520.947	682.161	2692.26
Arhgap44	546.298	1206.77	505.972
Arhgap5	1835.35	2208.29	3421.71
Arhgap6	1208.07	580.616	1181.49
Arhgap8	1.82102	81.8513	24.2978
Arhgdia	39955.6	35209.5	24789.8
Arhgdib	39012.9	31871.2	1975.26
Arhgdig	48.2349	141.666	49.2653
Arhgef1	266.206	456.155	1564.35
Arhgef10	215.626	308.39	1186.01
Arhgef10l	1209.09	2349.53	158.531
Arhgef11	230.961	512.185	570.505
Arhgef12	2341.88	2344.5	12052.1
Arhgef15	0	55.3061	458.379
Arhgef16	27.7625	10.3713	25.4476
Arhgef17	852.27	1315.67	485.018
Arhgef18	350.003	358.606	361.261
Arhgef19	26.6659	1.40672	108.996
Arhgef2	4528.59	4979.37	9000.29
Arhgef25	577.375	664.297	933.236
Arhgef26	0.447164	10.1716	393.122
Arhgef28	371.056	834.977	470.543
Arhgef3	549.652	221.622	1507.43
Arhgef39	97.5503	710.936	68.4098
Arhgef4	84.8215	103.788	38.1557
Arhgef40	441.557	487.843	1076.43
Arhgef5	893.751	1511.44	535.235
Arhgef6	4025.39	324.357	1998.5
Arhgef7	1488.78	1353.78	3088.79
Arhgef9	365.553	328.121	314.447
Arid1a	4084.88	3889.29	9414.21
Arid1b	3520.36	3876.92	8758.86
Arid2	2366.58	2474.33	5038.67
Arid3a	104.339	281.947	18.7848
Arid3b	323.861	156.016	625.574
Arid4a	586.478	550.991	2231.69
Arid4b	1896.78	1928.31	6431.01
Arid5a	1820.09	806.11	27918.2
Arid5b	1287.81	860.37	25354.5
Arih1	2342.53	1797.34	5518.2
Arih2	1312.6	1266.2	6613.19
Arl1	3831.11	1689.66	3830.7
Arl10	11.6748	46.6135	118.553
Arl13b	413.168	390.749	4225.71
Arl14ep	8868.37	8109.5	4331.74
Arl15	438.744	282.166	689.901
Arl16	1326.43	1112.46	315.364
Arl2	6505.46	4251.5	661.732
Arl2bp	482.072	410.5	628.096
Arl3	897.213	809.156	920.074
Arl4a	1750.59	263.088	17357.9
Arl4c	189.522	249.001	749.208
Arl4d	8.94329	13.4095	8695.71
Arl5a	18716.9	7124.56	3971.19
Arl5b	539.19	287.513	2504.36
Arl5c	14.3983	25.6733	34.3494
Arl6	1184.26	1791.55	990.064
Arl6ip1	9639.62	24241	6007.18
Arl6ip4	1570.33	1936.61	561.711
Arl6ip5	58944.7	24935	26279.9
Arl6ip6	696.419	1068.1	766.38
Arl8a	1119.17	790.042	858.838
Arl8b	18243.8	10491.2	13859.3
Armc1	5042.71	3563.24	1779.17
Armc10	563.094	660.139	306.565
Armc2	11.7153	2.06956	33.0859
Armc5	186.738	270.408	375.534
Armc6	1060.23	614.353	300.937
Armc7	237.442	284.346	259.088
Armc8	3201.49	1277.47	2377.5
Armc9	617.171	763.568	485.618
Armcx1	4100.58	1296.69	346.25
Armcx2	6000.84	6612.17	5765.9
Armcx3	11322.8	2425.81	5673.69
Armcx4	1458.68	428.252	205.996
Armcx5	3069.52	1717.44	863.871
Armcx6	1253.34	379.8	203.754
Armt1	1077.3	901.697	450.105
Arnt	1656.45	783.818	5967.06
Arnt2	64.9397	68.8812	163.224
Arntl	172.265	154.849	2483.17
Arntl2	23.5519	22.792	29.5392
Arpc1a	6673.51	6768.83	5585.15
Arpc1b	6133.82	8540.32	4605.38
Arpc2	14039.5	15943	9497.03
Arpc3	5061.36	4005.67	5365.66
Arpc4	7071.13	8219.44	4082.98
Arpc5	2420.88	4095.68	18669.3
Arpc5l	2096.34	2418.04	1429.39
Arpin	724.279	2455.61	401.376
Arpp19	13220.7	12575.4	3401.63
Arpp21	13605.2	461.275	401.671
Arrb1	172.747	106.585	728.15
Arrb2	31.5928	211.267	82.9747
Arrdc1	344.838	469.847	619.777
Arrdc2	20.3328	13.4247	149.35
Arrdc3	5537.42	1269.05	9567.35
Arrdc4	130.294	95.0266	380.635
Arsa	192.956	471.252	549.41
Arsb	154.373	317.212	1116.03
Arsg	69.0391	49.872	1095.62
Arsk	463.778	483.715	743.125
Art3	94.2988	19.6629	1829.3
Art5	210.454	5.81779	5.27215
Artn	5.82123	0.535674	4.81992
Arv1	186.471	227.573	367.703
Arvcf	318.914	230.023	466.968
Arxes2	1151	4706.99	63.6848
As3mt	925.059	317.222	951.28
Asah1	11395.2	7859.88	4469.99
Asah2	56.9172	93.0882	187.261
Asap1	1787.92	2716.33	1116.72
Asap2	155.712	419.117	139.805
Asap3	81.6811	160.506	2893.85
Asb1	5166.02	1958.37	546.407
Asb13	151.194	458.259	812
Asb15	140.276	0	2.18753
Asb2	188.248	53.5234	74.2195
Asb3	3249.6	1800.49	439.553
Asb4	125.147	227.854	504.427
Asb5	1765.75	9.1455	187390
Asb6	2974.25	2760.68	3001.08
Asb7	1024.1	513.609	301.831
Asb8	8770.7	3165.69	438.797
Ascc1	1819.36	1769.06	853.925
Ascc2	2274.86	2440.23	1521.06
Ascc3	1405.8	1035.18	2166.31
Asf1a	389.959	556.08	238.033
Asf1b	729.515	9017.43	357.781
Asgr1	241.164	116.538	6.68438
Ash1l	2216.06	2532.68	9971.22
Ash2l	777.928	1142.65	557.818
Asic3	56.9112	5.57845	54.6438
Asic4	0.91051	0.689852	3.04179
Asl	2217.09	1507.66	1394.46
Asna1	4231.61	4312.29	992.084
Asns	10779.8	3921.26	878.749
Asnsd1	2506.38	2501.19	901.843
Asph	3910.21	1928.26	1636.9
Asphd2	22.0081	22.7713	21.2142
Aspm	94.7239	1862.67	247.505
Aspn	216.915	1.7192	1644.16
Aspscr1	1141.93	2597.57	1122.53
Asrgl1	685.432	959.957	468.628
Ass1	6111.72	15300.9	958.605
Aste1	157.379	146.608	304.687
Asun	1477.98	1598.4	3008.27
Asxl1	1664.05	1633.88	3805.42
Asxl2	1228.8	1378.97	1004.89
Atad1	9753.32	7061.89	5230.02
Atad2	536.327	4926.14	965.189
Atad2b	1096.77	616.598	785.364
Atad3a	672.749	1280.01	2891.44
Atad3aos	36.552	38.4996	28.1451
Atad5	196.118	927.988	152.283
Atat1	2938.61	881.038	948.549
Ate1	1564.17	1288.22	1146.23
Atf1	1015.01	1246.23	3142.58
Atf2	3121.27	2835.67	4946.1
Atf3	1329.68	21.8374	44280.9
Atf4	9544.47	4111.31	30360.1
Atf5	171.996	44.4024	415.935
Atf6	2706.3	1559.93	12415.2
Atf6b	614.35	496.782	812.983
Atf7	1919.05	1720.5	3090.49
Atf7ip	781.403	1236.72	1560.76
Atf7ip2	0	137.631	31.1009
Atg10	1515.47	1499.18	600.12
Atg101	1882.54	2157.19	2396.06
Atg12	7386.33	2495.06	3460.49
Atg13	2414.48	1292.63	2173.29
Atg14	765.794	1048.94	2719.21
Atg16l1	498.095	615.164	618.129
Atg16l2	214.523	585.94	1694.89
Atg2a	403.604	553.115	3297.99
Atg2b	2129.49	837.932	2059.1
Atg3	702.561	624.821	789.364
Atg4a	2327.83	814.028	845.378
Atg4b	2758.86	2003.09	2989.46
Atg4c	945.888	557.073	937.687
Atg4d	248.473	336.062	750.472
Atg5	3265.02	2457.5	1404.21
Atg7	1376.48	1478.49	3010.67
Atg9a	1570.81	1082.91	2192.02
Athl1	267.94	629.896	1157.85
Atic	2325.95	4169.59	947.852
Atl1	77.6324	70.9824	81.9542
Atl2	918.821	1394.51	16833
Atl3	696.282	1309.09	1012.02
Atm	500.043	1121.65	536.415
Atmin	550.454	492.295	98.7843
Atn1	277.085	399.166	1426.46
Atoh8	97.8114	278.55	296.078
Atox1	6216.69	6185.34	1849.43
Atp10a	39.0872	82.7318	1307.33
Atp10d	292.847	1219.48	1104.18
Atp11a	1458.14	2388.52	3055.7
Atp11b	679.704	668.236	2463.84
Atp11c	73.8609	392.148	1879.14
Atp13a1	796.889	876.443	1769.98
Atp13a2	132.053	153.315	215.42
Atp13a3	7711.48	5006.13	10842.9
Atp1a1	2475.72	2322.51	4125.23
Atp1a2	682.937	0	3497.1
Atp1b1	916.867	69.7154	204.493
Atp1b2	58.2608	29.8723	2722.77
Atp1b3	1658.9	1516.42	2128.46
Atp1b4	210.215	0	8.81535
Atp2a1	64016.1	327.624	4107.37
Atp2a2	17829.4	5406.01	13952.3
Atp2a3	126.25	0	1288.49
Atp2b1	3011.82	5345.38	11110.7
Atp2b4	168.805	133.775	5034.91
Atp2c1	1652.55	2026.84	997.757
Atp5a1	68704.1	57380.3	34723.5
Atp5b	51029.6	48417.6	36050.3
Atp5c1	51914	46869	13520
Atp5d	13493.4	14632.8	7653.79
Atp5e	6260.3	4401.89	2424.72
Atp5f1	58655.5	36187.7	13646.6
Atp5g1	25507.7	15910.8	4653.59
Atp5g2	17211.3	15733.9	4813.33
Atp5g3	28349.3	22216.3	5841.33
Atp5h	25504.5	18839.5	5825.04
Atp5j	28165.1	19739.3	4880.51
Atp5j2	12411.8	8211.76	2181.44
Atp5k	6638.25	4388.1	671.173
Atp5l	32275.8	21678.4	6969.22
Atp5o	55101.2	36949.3	6677
Atp5s	1840.75	1140.44	373.776
Atp5sl	909.008	1106.47	705.335
Atp6ap1	16831.1	15313.3	15136.5
Atp6ap2	14634.1	7975.43	16232.3
Atp6v0a1	5176.46	4238.57	3378.87
Atp6v0a2	2410.42	2096.41	2009.99
Atp6v0b	16502.5	10485.9	5118.64
Atp6v0d1	3340.5	2704.29	1933.3
Atp6v0e	21157.9	11677.7	5810.25
Atp6v0e2	443.562	155.781	1177.58
Atp6v1a	14707.9	21641.3	11832.8
Atp6v1b2	2898.25	2047.73	3494.6
Atp6v1c1	5563.47	4159.33	1710.6
Atp6v1c2	21.4639	14.6495	7.00133
Atp6v1d	16035.9	6597.05	1780.42
Atp6v1e1	18791.5	10060	3298.24
Atp6v1f	9903.49	8253.79	3775.26
Atp6v1g1	42871.8	24266.7	7353.27
Atp6v1g2	83.5345	74.3943	55.4299
Atp6v1h	9935.81	6562.14	3811.06
Atp7a	5712.58	2347.27	4700.32
Atp8a1	211.203	51.8371	1192.99
Atp8b2	670.359	573.774	1534.49
Atp9a	684.03	308.146	812.678
Atp9b	726.683	797.877	1664.8
Atpaf1	393.57	420.149	114.177
Atpaf2	1754.92	2069.44	566.647
Atpif1	22768.7	20742.4	2790.87
Atr	650.988	1374.55	1003.81
Atraid	5012.1	3748.35	2854.47
Atrip	1347.86	1200.51	1924.19
Atrn	1164.93	1135.45	1268.32
Atrnl1	211.802	215.386	655.354
Atrx	5462.34	8808.91	13474.2
Atxn1	1135.28	800.829	1097.09
Atxn10	18451.4	16031.4	8430.05
Atxn1l	718.469	549.625	1055.85
Atxn2	2731.07	1540.67	2822.76
Atxn2l	655.355	681.851	2484.53
Atxn3	1055.33	692.325	1313.58
Atxn7	189.882	232.19	3426.83
Atxn7l1	338.331	311.322	921.548
Atxn7l2	194.734	337.017	935.201
Atxn7l3	132.445	222.749	407.912
Atxn7l3b	3256.02	2632.51	3836.59
Auh	73.0393	65.8744	106.6
Aup1	6603.24	5371.45	6715.4
Aurka	403.238	4949.47	252.589
Aurkaip1	5309.23	4830.98	1458.02
Aurkb	244.649	3305.2	92.6407
Auts2	797.365	989.628	4945.54
Aven	129.981	137.106	166.223
Avil	40.3095	4.04869	48.7726
Avl9	162.996	383.804	1137.43
Avpi1	2957.22	2667.64	376.378
Axin1	272.646	382.68	1374.15
Axin2	16.6584	1.72479	204.502
Axl	4973.18	13997	11727.7
Azi2	878.732	1008.62	4344.76
Azin1	22790.4	12051.7	52396.3
Azin2	85.8777	108.849	19.5815
B130006D01Rik	3.13015	0.896906	46.9685
B130024G19Rik	20.8123	40.8929	35.531
B130034C11Rik	60.7555	16.2316	6.16439
B230118H07Rik	1855.87	921.309	555.819
B230208H11Rik	31.6737	184.717	16.7976
B230217C12Rik	106.534	241.585	152.884
B230217O12Rik	24.4381	15.0476	79.6281
B230219D22Rik	3711.36	3009.98	3306.85
B230307C23Rik	229.799	231.243	132.921
B230354K17Rik	1200.52	1201.98	731.276
B2m	11170.8	9888.18	33421.2
B330016D10Rik	31.2103	14.3953	47.3558
B3galnt1	317.168	85.0601	469.513
B3galnt2	683.676	874.275	680.936
B3galt1	36.4954	172.563	1109.26
B3galt2	5461.31	118.19	116.417
B3galt6	24.333	77.1846	39.7091
B3gat2	33.6889	13.2355	76.8623
B3gat3	1012.07	697.493	447.577
B3glct	56.381	230.957	1091.44
B3gnt2	134.891	178.047	643.029
B3gnt5	2827.23	489.312	646.695
B3gnt7	0.90242	43.7227	10.983
B3gnt8	0	28.5541	23.2823
B3gnt9	29.3327	60.7886	6.14349
B3gntl1	626.761	340.695	272.848
B430212C06Rik	9.0161	1.3013	29.436
B430319G15Rik	64.4785	18.1133	46.2073
B4galnt1	162.235	165.071	32.8571
B4galnt2	9.56036	11.9909	29.4983
B4galt1	2688.35	4382.96	4179.99
B4galt2	484.834	597.114	171.103
B4galt3	1428.87	1196.91	2458.04
B4galt4	534.259	270.277	409.769
B4galt5	984.441	1073.06	3262.74
B4galt6	713.759	344.703	558.267
B4galt7	1483.71	1090.45	331.691
B4gat1	1597.06	2479.25	954.116
B630019K06Rik	9.56036	25.8488	2.1753
B930059L03Rik	40.3478	51.923	53.7001
B9d1	1211.25	1494.22	255.671
B9d2	662.034	838.723	1201.49
BB218582	53.9731	15.2227	35.2172
BC002163	2117.43	1518.07	58.4608
BC003331	2109.9	1482.92	2070.68
BC003965	1260	1385.61	694.048
BC004004	4686.83	2832.08	1543.8
BC005537	1279.44	1032.59	6126.79
BC005561	450.431	201.797	1520.47
BC005624	3578.3	2736.22	2125.79
BC017158	51.7314	82.9129	30.0659
BC017643	1612.51	1134.06	1685.67
BC020402	23.8777	128.07	36.5483
BC021767	0.894329	1.75445	23.0952
BC022687	80.0947	142.408	97.4085
BC023829	558.715	696.655	1096.33
BC024978	278.678	231.893	1074
BC025920	64.4057	21.3432	37.7604
BC028528	6.73983	12.939	21.0509
BC029214	1202.18	449.154	610.801
BC029722	20.8608	34.8346	10.4954
BC030336	973.756	1437.83	1762.55
BC030499	11.1872	24.8798	1.32485
BC030867	183.742	993.111	42.4022
BC031181	11746.7	7176.95	3538.38
BC031361	93.0868	88.5058	39.9594
BC035044	0	18.9771	16.2269
BC037032	31.7891	8.80749	5.78603
BC037034	71.6008	86.9442	28.4152
BC037704	13.1781	1.23228	23.1551
BC048403	56.5185	172.86	39.977
BC051226	13.601	13.4533	2.6632
BC052040	796.494	567.67	273.554
BC055324	265.896	1428.47	155.259
BC064078	4.47973	15.0961	62.4506
BC065397	55.177	87.3443	175.874
BC068281	140.705	277.282	549.64
Baalc	13.5929	15.3712	16.939
Babam1	1517.8	1452.62	584.806
Bace1	1160.94	855.755	2235.18
Bace2	413.948	919.307	350.816
Bach1	2234.32	754.883	4696.93
Bach2	58.4388	68.6987	582.305
Bach2os	5.39024	0	58.6049
Bad	2619.99	2614.14	847.175
Bag1	4006.84	1315.24	475.351
Bag2	8082.33	2301.31	312.239
Bag3	3039.17	3223.91	124521
Bag4	811.182	901.401	590.124
Bag5	2514.31	1758.18	2360.17
Bag6	1420.67	1188.66	1642.04
Bahcc1	72.5091	393.214	148.487
Bahd1	173.849	127.487	389.664
Baiap2	1257.74	2891.04	6305.66
Baiap2l1	4832.57	1548.27	325.422
Baiap2l2	3.57732	0.298969	12.2674
Bak1	626.388	650.706	37.1697
Bambi	19.9018	51.0361	411.426
Bambi-ps1	12.2919	12.2574	92.6851
Banf1	14150.5	17048.2	4634.18
Banp	3128.07	2463.58	9897.36
Bap1	2144.04	1979.81	3837.88
Bard1	41.4789	338.513	42.9766
Barx2	0	0.703362	30.5648
Basp1	594.255	514.301	60.087
Batf3	2.23582	10.27	23.0134
Bax	6916	9586.92	1251.65
Baz1a	2226.79	1832.17	6119.43
Baz1b	1098.02	2070.1	1246.66
Baz2a	1761.79	1481.99	3426.1
Baz2b	2116.81	1876.54	9317.78
Bbc3	41.2664	20.387	63.8351
Bbip1	4371.82	2787.39	1767.49
Bbof1	62.542	29.807	53.4635
Bbs1	77.1065	141.395	140.039
Bbs10	173.402	148.916	13.5945
Bbs12	842.083	865.786	200.846
Bbs2	386.996	445.227	1687.5
Bbs4	1116.21	699.061	574.806
Bbs5	2079.66	753.859	368.369
Bbs7	416.252	291.497	301.016
Bbs9	358.005	400.625	958.467
Bbx	1579.88	2612.5	4119.89
Bcam	166.573	228.564	360.413
Bcap29	2873.04	2197.83	1199.58
Bcap31	17970.8	16653.5	10448.4
Bcar1	1190.19	1665.44	1083.03
Bcar3	468.398	405.924	5565.44
Bcas1	0	2.97058	89.2428
Bcas2	5309.57	4962.25	2202.19
Bcas3	1476.71	1121.33	2314.54
Bcat1	819.603	340.126	270.104
Bcat2	4998.07	2278.43	2000.8
Bccip	3534.05	3798.03	3638.98
Bcdin3d	310.93	376.533	352.716
Bche	238.856	149.545	929.888
Bckdha	1194.6	1096.11	789.245
Bckdhb	168.93	185.171	229.474
Bckdk	6837.04	8101.01	2116.39
Bcl10	1761.95	1948.54	9865.79
Bcl11b	0.447164	39.094	5.78603
Bcl2	199.212	314.397	5318.41
Bcl2l1	12566.9	11048.1	3365.21
Bcl2l11	1244.84	677.333	1431.81
Bcl2l12	152.126	195.953	193.656
Bcl2l13	1674.62	1140.2	2787.87
Bcl2l15	17.0812	0	2.63977
Bcl2l2	322.858	278.772	759.136
Bcl3	32.0723	60.0736	929.731
Bcl6	1175.8	194.54	1278.53
Bcl6b	47.3465	50.9798	588.01
Bcl7a	841.516	484.887	636.754
Bcl7b	846.272	1074.31	1488.24
Bcl7c	101.324	126.791	172.918
Bcl9	409.356	538.224	322.352
Bcl9l	286.164	197.12	448.519
Bclaf1	9418.6	12359.3	17384.4
Bcor	1899.34	1950.29	1628.53
Bcorl1	989.807	193.15	794.977
Bcr	602.8	614.553	2347.19
Bcs1l	1374.35	1450.61	416.145
Bdh2	465.274	90.3444	470.778
Bdkrb1	15.9339	13.0233	15209.3
Bdkrb2	18.8052	5.91764	46.0126
Bdnf	127.933	154.868	932.684
Bdp1	1108.86	1074.53	4125.58
Bean1	24.7478	89.0618	6.65125
Becn1	2636.76	1661.92	3058.42
Begain	1.36577	8.95259	63.8874
Bend3	94.5356	390.817	735.833
Bend4	899.99	368.088	187.214
Bend5	13.6577	15.1562	30.2946
Bend6	82.966	804.354	4.87036
Bend7	39.5123	13.3436	245.199
Best1	262.728	22.2408	397.787
Bet1	5215.86	2590.02	1264.59
Bet1l	2685.26	1452.01	3539.49
Bex1	7944.8	218.132	258.769
Bex2	62.4935	318.152	19.8685
Bex4	28.3817	0	15.2393
Bfar	3271.11	2206.76	2417.42
Bglap	0	0.528919	451.394
Bglap2	8.57703	8.75905	25.3538
Bgn	19139.3	17637.9	34248
Bhlhb9	1102.24	1592.03	660.463
Bhlhe40	5558.54	1260.79	21402.6
Bhlhe41	11218.6	2564.51	5576.38
Bicc1	19.8937	71.9655	2085.51
Bicd1	193.644	81.3315	157.549
Bicd2	3254.48	1107.69	2283.77
Bid	1442.33	1216.24	516.717
Bik	11.2357	11.5061	72.8924
Bin1	4613.82	739.935	1300.76
Bin3	1432.7	1504.61	1472.16
Birc2	2220.13	1979.18	4249.85
Birc3	266.726	257.518	10591
Birc5	671.942	7930.17	316.023
Birc6	5374.23	7053.63	8605.22
Bivm	657.546	881.243	215.746
Blcap	2960.81	4842.5	2585.57
Blm	341.412	550.554	87.2064
Blmh	4466.98	2831.93	2986.78
Blnk	28.5273	333.926	4516.6
Bloc1s1	6077.51	3249.76	2004.62
Bloc1s2	5660.02	6047.61	1086.61
Bloc1s4	76.5843	74.6242	199.031
Bloc1s5	816.047	625.063	125.747
Bloc1s6	2228.12	1674	299.759
Blvra	1992.11	3483.43	842.614
Blvrb	3815.55	9610	2192.47
Blzf1	4110.22	2025.73	3585.44
Bmf	68.7376	19.5125	19.2944
Bmi1	464.6	678.504	1074.31
Bmp1	1091.41	1251.52	9032.87
Bmp2	0	3.23957	1066.97
Bmp2k	116.183	40.7483	633.075
Bmp4	81.7642	928.765	7177.22
Bmp6	59.4545	253.911	3573.73
Bmper	218.859	986.474	820.092
Bmpr1a	2613.24	2400.43	2552.51
Bmpr1b	0	27.4203	80.4531
Bmpr2	5144.17	4916.57	10134.8
Bms1	1813.72	1941.79	1020.4
Bmt2	1030.07	1993.69	1249.64
Bmyc	233.595	420.802	1610.54
Bnc2	65.0389	79.1449	1816.17
Bnip1	1252.86	897.86	339.733
Bnip2	4619.84	4136.78	2804.65
Bnip3	13331	6108.79	2467.73
Bnip3l	9820.24	10024.1	9661.48
Boc	283.619	2115.63	2868.37
Bod1	1419.29	664.034	518.108
Bod1l	1264.99	1476.76	1674.96
Bok	119.925	1251.51	921.89
Bola1	1010.49	1136.61	207.018
Bola2	2579.13	2036.6	568.69
Bola3	188.573	588.789	141.175
Bop1	2694.2	3673.8	3296.86
Bora	157.061	955.902	299.713
Borcs5	202.883	206.336	137.604
Borcs6	23.0724	34.8949	199.358
Borcs7	725.515	645.539	651.307
Borcs8	1591.67	1305.75	602.949
Bpgm	2135.65	720.997	1027.46
Bphl	1719.23	1302.5	745.034
Bpnt1	840.305	740.565	1646.03
Bptf	2147.22	2324.63	5504.29
Braf	2923.81	3542.01	25731.4
Brap	299.334	251.443	898.442
Brat1	737.936	953.623	884.441
Brca1	157.139	1998.68	71.0677
Brca2	79.1114	708.362	188.176
Brcc3	3897.5	3511.4	1434.2
Brd1	1581	2117.85	3959.71
Brd2	2251	3149.1	10780.5
Brd3	7797.86	5794.69	4775.94
Brd4	1295.82	1596.32	4894.24
Brd7	4182.14	3756.74	1300.82
Brd8	2893.8	4542.27	6997.41
Brd9	2445.28	2660.89	4051.4
Brdt	14.9425	24.5283	271.081
Bre	5055.73	3868.75	3130.04
Brf1	346.177	345.268	635.882
Brf2	1036.51	786.195	260.281
Bri3	345.952	371.672	182.449
Bri3bp	589.679	927.945	321.465
Brip1	91.6665	1226.29	18.1828
Brip1os	456.657	2124.04	543.389
Brix1	19131.8	18030.9	18822.6
Brk1	17106.3	11355.8	4401.27
Brms1	2939.03	2549.43	923.429
Brms1l	1581.31	888.497	911.724
Brpf1	541.64	668.915	1662.96
Brpf3	112.005	105.335	554.926
Brsk1	1.34958	4.66277	12.823
Brwd1	2755.45	2464.41	7045.7
Brwd3	120.309	163.808	407.324
Bscl2	2356.15	2387.47	2643.07
Bsdc1	1523.98	745.495	4296.82
Bsg	13770.3	10463	5876.96
Bsn	21.041	150.461	13.0286
Bst2	72.754	108.041	444.979
Btaf1	678.69	1394.14	6154.27
Btbd1	2025.89	865.629	1053.32
Btbd10	888.827	564.991	1497.03
Btbd11	133.41	323.373	243.185
Btbd19	279.404	676.269	155.156
Btbd2	584.23	681.621	345.246
Btbd3	365.579	836.895	1107.39
Btbd6	214.207	133.038	32.1424
Btbd7	273.554	455.064	1545.07
Btbd9	1241.8	1630.12	2462.61
Btc	108.729	191.596	336.462
Btd	1082.35	1010.34	2502.88
Btf3	32634.8	31083.9	25085
Btf3l4	8883.39	7064.03	2988.32
Btg1	14678.9	8466.6	163223
Btg2	7092.06	4496	142697
Btg3	27.975	26.4641	100.88
Btla	19.0803	0	9.53583
Btrc	2316.42	1732.81	1097.41
Bub1	189.334	3387.59	260.612
Bub1b	105.782	3804.8	176.387
Bub3	10415.1	14742.3	2855.69
Bud13	1186.33	944.248	633.78
Bud31	3628.35	2515.99	2350.09
Bves	930.821	1440.56	220.456
Bvht	393.011	7.13292	135.829
Bysl	2776.81	2153.59	1645.13
Bzrap1	0	0.466656	1.31134
Bzw1	30632.7	28075.7	34973.3
Bzw2	6851.93	7156.8	3144.73
C030006K11Rik	17.9998	11.05	15.823
C030013C21Rik	1.81293	5.48127	17.6692
C030034I22Rik	38.7636	65.8503	127.102
C130036L24Rik	7.27599	8.46683	14.5153
C130083M11Rik	34.3	37.7178	0.878731
C1d	14511.3	11041.3	2209.34
C1galt1	32.7644	59.4739	296.013
C1galt1c1	5256.51	3119.61	837.188
C1qbp	911.381	926.87	382.272
C1ql1	1.34149	3.03285	7.86552
C1qtnf1	4.95117	93.4696	531.42
C1qtnf3	2229.45	861.579	17413.8
C1qtnf4	7.18699	6.55525	7.09356
C1qtnf6	536.335	542.677	810.306
C1ra	19.7966	7.77318	636.421
C1rl	145.411	53.6901	126.014
C1s2	17.7226	0	28.8071
C2	0.447164	53.2488	527.034
C230035I16Rik	15.0072	18.5577	19.8837
C230091D08Rik	1468.95	866.87	808.498
C2cd2	130.315	212.866	537.649
C2cd2l	120.924	92.8384	495.24
C2cd3	897.594	979.716	1120.45
C2cd5	487.899	521.351	676.662
C330006A16Rik	4583	6550.11	4338.81
C330007P06Rik	2690.67	3418.33	3477
C330013E15Rik	15.8368	4.30037	9.75549
C330018D20Rik	1293.68	1003.86	146.473
C330021F23Rik	46.9905	41.9944	40.2734
C330024D21Rik	223.895	116.251	9.22072
C330027C09Rik	394.07	2931.38	371.217
C3ar1	21.8522	187.503	213.011
C430049B03Rik	3712.44	96.8757	32.2675
C4a	8.64985	16.7871	105.142
C530005A16Rik	20.4784	13.9656	2.62626
C530008M17Rik	4.54446	146.15	28.538
C630043F03Rik	59.8855	14.6133	59.9184
C77080	377.499	518.084	401.655
C87436	531.472	815.657	1050.25
C8g	47.7635	85.9278	28.9605
C920006O11Rik	328.732	201.287	84.1349
C920009B18Rik	5.45497	38.3273	56.5901
C920021L13Rik	21.7632	7.2909	10.1721
Caap1	296.119	289.051	63.0195
Cab39	2975.14	1724.68	2283.02
Cab39l	2934.56	3943.05	2305.44
Cabin1	853.887	1251.75	2013.48
Cables1	10.7886	38.5608	486.371
Cables2	268.186	303.586	1266.84
Cabyr	41.1391	15.0423	57.9806
Cacfd1	697.797	656.763	183.639
Cachd1	60.5776	200.216	671.292
Cacna1a	3.1706	11.3789	47.8074
Cacna1c	16.1788	285.113	14.742
Cacna1d	5.82932	113.246	916.273
Cacna1g	74.7876	107.206	11.3351
Cacna1h	18.2102	4.01724	19.9761
Cacna1s	6690.6	0.988821	45.4684
Cacna2d1	6543.92	754.097	1376.76
Cacnb1	1855.84	99.6287	166.991
Cacnb3	440.225	276.938	162.553
Cacnb4	198.004	26.8099	291.921
Cacng1	19847.2	1738.2	339.741
Cactin	189.919	234.98	227.769
Cacul1	853.465	603.537	1252.02
Cacybp	11660.7	12394.8	5826.48
Cad	1352.02	4471.88	1315.33
Cadm1	612.541	2457.38	473.418
Cadm2	0.894329	45.5362	288.836
Cadm4	0.455255	4.38523	59.5407
Cadps2	133.127	504.478	83.2661
Cage1	66.7812	26.1678	3.50372
Cahm	9.55227	18.1742	9.65334
Calca	5.00781	18.3139	384.792
Calcoco1	5730.29	3236.92	3673.51
Calcr	3.64204	0.827888	12256
Calcrl	1033.54	1655.14	3169.31
Cald1	13060.7	15474.7	9119.87
Calhm2	20.5777	19.5725	43.2751
Calm1	66261	82988.5	49742.6
Calm2	43253.9	48976.6	60540.5
Calm3	1659.79	1825.23	779.787
Calml4	496.296	44.1918	69.3397
Calr	23084.5	13294.2	16836.9
Calr3	95.4866	115.448	52.8477
Calu	27911.5	20045.4	21912.8
Camk1	234.469	470.76	650.126
Camk1d	71.7523	45.3784	125.88
Camk2a	2122.62	147.455	3.50142
Camk2b	63.9909	41.7304	104.478
Camk2d	4915.87	3715.88	2649.79
Camk2g	2729.76	3369.38	1678.8
Camk2n1	76.0136	62.0282	1082.84
Camk2n2	9.45518	6.68769	15.85
Camk4	379.808	196.234	402.181
Camkk1	96.6339	338.017	25.5954
Camkk2	18.4713	77.4003	86.9897
Camkmt	62.0404	96.6159	378.087
Caml	1387.62	1254.4	1493.23
Camsap1	2210.88	1650.14	1514.81
Camsap2	1347.5	1771.93	2356.12
Camta1	339.854	396.514	2188.36
Camta2	238.53	322.692	1611.71
Cand1	3850.55	4381.35	4942.09
Cand2	2174.32	685.03	349.148
Cant1	909.73	1478.59	412.078
Canx	82088.6	78777.7	46145
Cap1	18113	20486.5	11898.9
Cap2	7395.08	4101.31	1026.52
Capg	3024.44	5456.17	3148.01
Capn1	1382.88	926.967	247.834
Capn10	102.744	139.737	30.2507
Capn15	33.1063	48.4225	251.694
Capn2	7025.16	6929.65	10624.2
Capn3	120.02	0.535674	40.2569
Capn5	364.883	720.633	1754.16
Capn6	24113.7	9230.06	5438.51
Capn7	1057.9	673.245	1726.34
Capns1	7342.34	8391.64	7862.87
Caprin1	6817.28	9636.69	6971.58
Caprin2	260.846	572.946	436.124
Capza1	18934.6	13241.4	14583.1
Capza2	30589.5	19203.9	28289.9
Capzb	15502.5	12659.1	6761.52
Car12	98.908	82.6048	4613.2
Car13	1770.05	277.494	286.24
Car14	20.0312	140.632	31.7992
Car15	42.0717	5.95172	96.2306
Car2	133.121	833.234	294.197
Car3	2534.39	231.675	1323.58
Car5b	244.023	174.271	351.841
Car7	9.39045	2.39175	169.933
Card10	38.3083	8.88325	1737.68
Card14	4.05684	4.16646	43.7996
Card19	1197.58	1493.48	779.726
Card6	42.2762	30.5764	15.6661
Carf	1743.39	1167.61	968.046
Carhsp1	9724.17	9789.35	13317.7
Carkd	4123.95	3709.67	2001.57
Carm1	448.658	521.746	453.158
Carnmt1	338.599	345.194	232.722
Carns1	123.561	673.302	129.87
Cars	6202.04	3439.82	9241.31
Cars2	76.7785	95.476	233.046
Casc3	562.657	775.683	2642.76
Casc4	1608.05	1207.16	1484.4
Casc5	20.4541	786.248	69.4999
Casd1	1066.84	796.467	726.875
Cask	1377.24	1634.52	6027.77
Caskin1	9.07274	9.3649	39.9136
Caskin2	158.371	174.805	568.218
Casp12	1233.48	200.294	2369.83
Casp2	886.639	2316.42	835.982
Casp3	4307.75	2206.49	2330.96
Casp6	2194.71	2815.3	619.494
Casp7	528.557	1273.83	315.874
Casp8	476.672	924.731	668.198
Casp8ap2	611.768	1505.22	1214.69
Casp9	1304.37	868.74	373.747
Casq1	12127.7	17.6736	107.556
Casq2	76275.6	36.8263	764.558
Cast	5886.59	6122.13	9318.76
Casz1	372.762	3.20054	235.677
Cat	7493.96	7867.24	3058.74
Catsper2	152.157	67.2285	153.428
Cav1	854.51	702.811	71066.3
Cav2	1002.31	411.911	8604.62
Cav3	5826.75	25.0328	32.9491
Cbarp	37.072	90.9595	62.0521
Cbfa2t2	2253.28	2235.6	3178
Cbfa2t3	842.861	36.1053	841.469
Cbfb	6292.22	2999.78	5305.98
Cbl	187.361	137.245	532.391
Cblb	1160.35	904.336	1291.6
Cbll1	2883.96	1667.2	2711.53
Cbr1	1403.22	1124.41	492.213
Cbr2	790.078	330.12	130.023
Cbr3	110.044	950.247	637.731
Cbr4	1306.33	949.071	204.235
Cbs	19.1207	47.0984	1011.02
Cbwd1	2151.14	1671.71	592.235
Cbx1	965.599	1556.82	967.42
Cbx3	64369.4	113333	23906
Cbx4	42.9337	48.5709	329.421
Cbx5	28842.9	21983.1	6934.29
Cbx6	275.768	756.098	415.972
Cbx7	16.626	19.5603	351.241
Cbx8	149.844	64.3552	156.804
Cby1	1067.78	1514.37	299.333
Cc2d1a	384.381	514.595	532.989
Cc2d1b	999.584	1611.66	942.55
Cc2d2a	406.246	560.222	1857.75
Ccar1	6793.68	8076.51	7828.45
Ccar2	1351.4	2106.47	1060.76
Ccdc102a	67.1556	122.45	143
Ccdc107	1336.18	1104.73	744.684
Ccdc109b	25.6825	16.3557	281.858
Ccdc112	114.609	126.957	155.873
Ccdc114	13.1458	64.1881	286.083
Ccdc115	1027.2	671.715	1873.52
Ccdc116	2.73153	25.6029	61.5113
Ccdc117	344.083	234.074	2788.36
Ccdc12	1465.68	1759.63	821.679
Ccdc120	55.9419	76.0952	29.7187
Ccdc124	1021.88	1274.07	798.206
Ccdc125	0.91051	13.8713	8.32976
Ccdc126	257.073	404.828	479.268
Ccdc127	5745.53	4101.27	3751.97
Ccdc13	0.447164	6.21542	1.77097
Ccdc130	1794.53	949.778	575.982
Ccdc134	4149.35	742.597	1848.97
Ccdc136	369.136	175.833	209.812
Ccdc137	682.695	1046.21	3058.75
Ccdc138	169.564	230.689	38.4619
Ccdc14	800.062	856.985	268.105
Ccdc141	15347.6	222.905	555.528
Ccdc142	37.3493	17.0617	47.3658
Ccdc146	0.455255	1.79381	10.0052
Ccdc149	2.68299	6.23569	143.381
Ccdc15	58.1799	108.837	95.0907
Ccdc150	38.0958	38.6478	42.517
Ccdc157	230.714	218.03	940.082
Ccdc159	114.607	66.9006	87.2449
Ccdc162	855.324	14.0267	247.762
Ccdc163	1180.1	1923.42	1942.54
Ccdc167	119.54	153.653	213.512
Ccdc17	108.078	66.1786	105.772
Ccdc171	106.558	114.397	191.341
Ccdc173	183.054	146.242	141.072
Ccdc174	2586.11	1588.98	2809.36
Ccdc18	6.80455	610.709	173.031
Ccdc181	1129.19	514.101	157.326
Ccdc186	383.688	370.019	1152.83
Ccdc189	413.243	436.791	131.141
Ccdc191	199.364	293.605	239.706
Ccdc22	1392.84	1035.16	681.3
Ccdc24	44.5745	39.4775	21.2216
Ccdc25	1466.48	1169.02	2150.58
Ccdc28a	375.501	170.455	249.896
Ccdc28b	472.445	495.595	137.301
Ccdc3	209.375	0	143.705
Ccdc32	744.328	667.763	377.358
Ccdc34	861.563	2219.41	460.223
Ccdc38	49.5683	42.3439	96.4238
Ccdc39	78.1119	51.5261	283.554
Ccdc43	5704.6	2031.98	2258.3
Ccdc47	8977.19	6551.31	3688.11
Ccdc50	3907.38	3275.23	10085.7
Ccdc51	856.517	567.962	49.1376
Ccdc53	4883.19	2446.3	734
Ccdc57	202.78	224.1	380.397
Ccdc58	2542.57	2556.79	481.524
Ccdc59	4986.34	4644.12	4175.4
Ccdc6	9933.06	6774.46	16040.5
Ccdc61	11.7557	37.4445	91.137
Ccdc62	54.0238	53.9012	187.869
Ccdc64	26.1621	53.5126	2.62626
Ccdc64b	9.1051	1.22553	143.209
Ccdc66	1147.09	849.471	776.41
Ccdc68	178.545	133.861	37.0168
Ccdc69	70.4292	9.52255	77.54
Ccdc71	482.254	557.034	279.813
Ccdc71l	185.85	138.938	212.2
Ccdc73	1.36577	62.6013	9.18552
Ccdc74a	33.2439	90.6305	9.27244
Ccdc77	793.138	1202.56	635.936
Ccdc78	0.90242	8.55611	3.0553
Ccdc8	45.5762	67.2167	62.5021
Ccdc80	541.608	98.4768	3513.91
Ccdc83	88.8336	81.5634	111.028
Ccdc84	72.2907	76.1725	295.075
Ccdc85b	9.98325	80.7277	1133.74
Ccdc86	1800.2	1530.39	3466.58
Ccdc88a	2124.67	3812.31	2758.36
Ccdc88b	0	4.30945	3.505
Ccdc88c	226.657	25.3956	249.295
Ccdc9	93.2022	97.5433	760.166
Ccdc90b	2906.05	2295.03	513.815
Ccdc91	978.793	684.569	559.91
Ccdc93	1191.41	1499.09	483.895
Ccdc94	242.091	259.954	131.206
Ccdc96	23.2525	8.74488	5.69738
Ccdc97	1717.12	1618.28	2874.7
Cchcr1	49.1212	86.7631	128.027
[truncated: 11,097 more rows]
