# Supplementary material
Source: publisher figshare collection journal article supplement (https://plos.figshare.com/articles/dataset/_/4909007)
Supplement: Supplementary file 1 [file 1 › S2 Table.xlsx]

## Sheet: Table2_Pax7_binding_site_coordi
chr1	4802780	4803209	Lypla1
chr1	10581053	10582258	Cpa6
chr1	10582541	10583178	Cpa6
chr1	14296390	14297005	Eya1
chr1	17049974	17050900	Jph1
chr1	19758437	19759265	Tfap2b
chr1	20059525	20060220	4930486I03Rik
chr1	20277189	20277693	4930486I03Rik
chr1	20941013	20941544	Efhc1
chr1	22887434	22887917	Rims1
chr1	22888307	22888720	Rims1
chr1	24114212	24114689	Fam135a
chr1	24254677	24256018	Col9a1
chr1	24518150	24518761	Col19a1
chr1	24519209	24519782	Col19a1
chr1	24636663	24637628	Col19a1
chr1	28622345	28622958	Gm597
chr1	28789705	28790264	Gm597
chr1	29327732	29328329	Mir6342
chr1	34045611	34046193	Dst
chr1	36652813	36653447	Fam178b
chr1	38319941	38320954	Rev1
chr1	39201040	39201872	Mir6349
chr1	39314380	39314834	Npas2
chr1	39369317	39369717	Rpl31
chr1	39424480	39425181	Rpl31
chr1	39636013	39636633	Rnf149
chr1	39788109	39789273	Rfx8
chr1	39895562	39896526	1700066B17Rik
chr1	40090647	40091256	Il1r2
chr1	40339012	40339815	Il1r1
chr1	41050044	41050742	4930448I06Rik
chr1	41495625	41496372	4930448I06Rik
chr1	44637198	44637758	Gulp1
chr1	45682502	45683348	Col5a2
chr1	51323741	51324545	Sdpr
chr1	52328535	52329297	Gls
chr1	52511559	52512044	Nab1
chr1	53415095	53415636	Asnsd1
chr1	56889715	56890714	Satb2
chr1	57602529	57603531	Tyw5
chr1	57694067	57694753	Spats2l
chr1	58196383	58197318	Aox3
chr1	60756222	60756808	Cd28
chr1	62137951	62138342	Pard3b
chr1	62255942	62256753	Nrp2
chr1	62318194	62318749	Nrp2
chr1	62490626	62491449	Nrp2
chr1	62562464	62563049	Nrp2
chr1	62826466	62827305	4930487H11Rik
chr1	63023103	63023734	Ino80d
chr1	63580726	63581878	Adam23
chr1	66274622	66275104	Map2
chr1	67918821	67919288	Cps1
chr1	69421922	69422679	Erbb4
chr1	71068088	71068913	Bard1
chr1	72048861	72049666	4933417E11Rik
chr1	72356149	72356864	Xrcc5
chr1	72827289	72827880	Igfbp2
chr1	72925230	72925928	Igfbp5
chr1	73025391	73026023	Tnp1
chr1	73085224	73086869	1700027A15Rik
chr1	73430356	73430813	D530049I02Rik
chr1	73504066	73504713	Pinc
chr1	75829535	75830346	Slc4a3
chr1	76845114	76845646	Mir6343
chr1	76910505	76911238	Mir6343
chr1	77467553	77468137	Mir6352
chr1	77507613	77508327	Epha4
chr1	77511167	77511803	Epha4
chr1	78010028	78010594	Pax3
chr1	78116900	78117231	Pax3
chr1	78213726	78214384	Pax3
chr1	78367906	78368954	Sgpp2
chr1	78701541	78702099	Utp14b
chr1	78904492	78904901	Kcne4
chr1	79052369	79053621	Kcne4
chr1	79436348	79437081	Scg2
chr1	79576937	79578388	Ap1s3
chr1	80558270	80558982	Dock10
chr1	81512577	81513216	Nyap2
chr1	81734795	81735477	Mir6344
chr1	81910087	81910752	Mir6344
chr1	81958746	81959429	Mir6344
chr1	81973322	81974214	Mir6344
chr1	82159275	82159964	Mir6344
chr1	82228670	82229449	Irs1
chr1	82721250	82721806	Mff
chr1	88897848	88898571	Alppl2
chr1	90982569	90983929	Sh3bp4
chr1	91610543	91611099	4933400F21Rik
chr1	92164496	92165525	Ackr3
chr1	92228532	92229375	Ackr3
chr1	92231262	92232125	Ackr3
chr1	92869901	92870408	Rab17
chr1	93757497	93757995	Twist2
chr1	94124375	94125386	Hdac4
chr1	97415767	97416387	St8sia4
chr1	97557799	97558218	St8sia4
chr1	102186446	102187251	Cntnap5b
chr1	104463189	104463789	Gm20268
chr1	116570266	116571015	Cntnap5a
chr1	117743176	117743680	Cntnap5a
chr1	117823330	117823869	Cntnap5a
chr1	118191489	118192065	Cntnap5a
chr1	118324533	118325360	Cntnap5a
chr1	120207402	120207865	Tsn
chr1	120284536	120285908	Clasp1
chr1	121535738	121536764	Epb41l5
chr1	121749228	121749955	Ptpn4
chr1	122546294	122548095	En1
chr1	122910381	122910984	Celrr
chr1	123156382	123157542	Insig2
chr1	123225964	123226499	Insig2
chr1	124203419	124204025	Ddx18
chr1	124458886	124459400	Ddx18
chr1	129278603	129279275	Mgat5
chr1	130256176	130256504	Mcm6
chr1	130379318	130380080	Dars
chr1	130483738	130484627	Cxcr4
chr1	133078092	133078866	Rassf5
chr1	134163024	134163632	Klhdc8a
chr1	136911462	136912124	Ube2t
chr1	136979962	136980371	Lgr6
chr1	137220990	137221435	Lmod1
chr1	138036640	138037103	Kif21b
chr1	139626342	139626812	Mir181a-1
chr1	139796755	139797395	Mir181a-1
chr1	140457105	140457718	Nek7
chr1	140514102	140515086	Nek7
chr1	142079730	142080304	Cfh
chr1	144828887	144829263	B3galt2
chr1	145997430	145998132	Rgs13
chr1	146391631	146392164	Rgs21
chr1	146517009	146517747	Rgs21
chr1	152591912	152592491	Hmcn1
chr1	152680654	152681520	Hmcn1
chr1	154225348	154226289	Tsen15
chr1	154400626	154401703	Rgl1
chr1	154427428	154427827	Rgl1
chr1	154531290	154531829	Rgl1
chr1	155113861	155114405	Lamc1
chr1	155139362	155139703	Lamc1
chr1	155174717	155175165	Lamc1
chr1	156913024	156914083	Ier5
chr1	157076579	157077490	Stx6
chr1	157080483	157081823	Stx6
chr1	157094342	157095092	Stx6
chr1	157333305	157334411	Gm5532
chr1	157606190	157606803	Lhx4
chr1	157893639	157894258	Tor1aip2
chr1	158351191	158351854	Soat1
chr1	158545456	158546559	Abl2
chr1	158925271	158925911	Ralgps2
chr1	158933180	158934407	Ralgps2
chr1	159436874	159437743	Sec16b
chr1	162346922	162347924	Rabgap1l
chr1	162448569	162449105	Gpr52
chr1	162778788	162779748	Rabgap1l
chr1	162836212	162837000	Rc3h1
chr1	164111137	164111811	Dnm3os
chr1	164722468	164723345	Fmo4
chr1	165151471	165152682	Prrx1
chr1	165232167	165232755	Prrx1
chr1	165320891	165322029	Gorab
chr1	166927764	166928105	Xcl1
chr1	167704830	167706394	Creg1
chr1	169528383	169528943	Rxrg
chr1	170160042	170160619	Pbx1
chr1	170403034	170403639	Mir6348
chr1	173152351	173153015	Tomm40l
chr1	173504877	173505511	Cd244
chr1	173979343	173980068	Nhlh1
chr1	174063119	174064037	Pex19
chr1	174562716	174563648	Dusp23
chr1	174641511	174641862	Crp
chr1	181051661	181053193	Smyd3
chr1	181447623	181448262	Smyd3
chr1	182214094	182215066	Psen2
chr1	182825725	182826665	Lefty2
chr1	183533415	183534063	Ccdc121
chr1	183846146	183846724	Lbr
chr1	184431005	184431326	Capn2
chr1	184683809	184684411	Ccdc185
chr1	185994682	185995509	Dusp10
chr1	186068231	186068873	Dusp10
chr1	186181327	186182209	1700112H15Rik
chr1	186531155	186533160	4930488B22Rik
chr1	188073991	188074692	Lyplal1
chr1	189087573	189088038	Gpatch2
chr1	189126971	189127447	Gpatch2
chr1	189974898	189975464	Ush2a
chr1	190966774	190967614	Kctd3
chr1	191061894	191062818	Kcnk2
chr1	191373961	191374499	Cenpf
chr1	191684998	191685510	Smyd2
chr1	192087225	192088020	Prox1
chr1	192461165	192461929	Rps6kc1
chr1	192597052	192597981	Rps6kc1
chr1	192599817	192600300	Rps6kc1
chr1	193278357	193279013	Ppp2r5a
chr1	193298336	193298975	Ppp2r5a
chr1	193368501	193369076	Dtl
chr1	193382624	193383970	Dtl
chr1	194014363	194014894	Kcnh1
chr1	195402130	195402697	Mir205
chr1	195605727	195606354	Mir205
chr1	196171668	196172795	4930503O07Rik
chr1	196308539	196308986	Plxna2
chr1	196328931	196329367	Plxna2
chr1	196582619	196583809	Mir3962
chr10	3067356	3067919	Cnksr3
chr10	3187357	3187739	Cnksr3
chr10	5081780	5082598	Syne1
chr10	5275193	5276094	Syne1
chr10	6749485	6749912	Iyd
chr10	6809920	6810452	Iyd
chr10	6836076	6836962	Iyd
chr10	8698195	8698882	Sash1
chr10	9391387	9392076	Samd5
chr10	12484649	12485144	Utrn
chr10	12631651	12632476	B230208H11Rik
chr10	12825942	12826765	Hymai
chr10	12890347	12891914	Zc2hc1b
chr10	12897991	12898703	Zc2hc1b
chr10	12899943	12900639	Zc2hc1b
chr10	12989854	12990399	Phactr2
chr10	13108243	13109246	Phactr2
chr10	13486857	13487270	Aig1
chr10	13551807	13552101	Aig1
chr10	14633041	14633361	Nmbr
chr10	14634823	14635491	Nmbr
chr10	15599314	15600109	C330004P14Rik
chr10	17932731	17933076	Ect2l
chr10	19214411	19215125	Ifngr1
chr10	20301976	20302616	Pde7b
chr10	21024777	21025257	Hbs1l
chr10	21544145	21544868	Sgk1
chr10	22328711	22329366	Slc2a12
chr10	22357460	22358202	Slc2a12
chr10	22846183	22846996	Eya4
chr10	22901295	22902227	Eya4
chr10	23232792	23233284	Eya4
chr10	23330013	23330303	Snora33
chr10	23395450	23396347	Snora33
chr10	23868777	23869244	Stx7
chr10	24589485	24590075	Med23
chr10	25208089	25208573	Smlr1
chr10	25931682	25933244	Samd3
chr10	27041874	27042797	4930579H20Rik
chr10	27104349	27104861	4930579H20Rik
chr10	27795986	27796657	Ptprk
chr10	27875620	27876230	Ptprk
chr10	28243601	28244260	Themis
chr10	29225105	29225598	Rspo3
chr10	29641343	29642177	Cenpw
chr10	30373960	30374519	Ncoa7
chr10	31462184	31462676	Rnf217
chr10	31626438	31626880	Rnf217
chr10	31627106	31627814	Rnf217
chr10	33504058	33504536	Gm4794
chr10	36854625	36855178	Marcks
chr10	37019980	37020486	Marcks
chr10	37127189	37127878	Marcks
chr10	38273307	38274110	Rfpl4b
chr10	38287086	38287490	Rfpl4b
chr10	38289016	38289546	Rfpl4b
chr10	38415624	38416218	Rfpl4b
chr10	38889332	38890359	Wisp3
chr10	39439925	39440601	E130307A14Rik
chr10	39789044	39789537	AI317395
chr10	40392257	40392969	Mettl24
chr10	42890292	42891134	Sobp
chr10	43209042	43209677	Bend3
chr10	43798943	43799605	Aim1
chr10	44786738	44787740	Prep
chr10	44796302	44797387	Prep
chr10	44804664	44805280	Prep
chr10	45944618	45945186	D030045P18Rik
chr10	56362519	56364045	Gja1
chr10	56503199	56504746	Gja1
chr10	58973386	58973855	Oit3
chr10	59364431	59365212	Dnajb12
chr10	59383564	59384302	Ddit4
chr10	59453578	59454583	Ascc1
chr10	59750503	59750979	Psap
chr10	59990426	59991441	Gm17455
chr10	60983261	60983787	Lrrc20
chr10	60998710	60999140	Npffr1
chr10	61881455	61882224	Hkdc1
chr10	61949674	61950196	Vps26a
chr10	62784264	62785060	Sirt1
chr10	66561165	66562254	Reep3
chr10	66565536	66565894	Reep3
chr10	66573533	66573972	Reep3
chr10	66795197	66795608	Nrbf2
chr10	68022004	68022557	1700040L02Rik
chr10	68895054	68895503	Cdk1
chr10	68984641	68985552	Ank3
chr10	68996280	68996678	Ank3
chr10	69091533	69091982	Ank3
chr10	69259179	69260335	Ank3
chr10	69273252	69274079	Ank3
chr10	69289232	69290356	Ank3
chr10	69855009	69855509	Fam13c
chr10	70495115	70495759	Bicc1
chr10	72509962	72510516	A330049N07Rik
chr10	72514751	72515421	A330049N07Rik
chr10	74319070	74319813	Gnaz
chr10	74580536	74581157	Bcr
chr10	74799746	74800273	Gm5779
chr10	75010841	75011555	Lrrc75b
chr10	76689531	76690030	Gm10941
chr10	79408348	79409532	Wdr18
chr10	79626919	79628844	Cirbp
chr10	79783085	79783649	2310011J03Rik
chr10	80391458	80392401	Gadd45b
chr10	82579440	82580044	Chst11
chr10	82581325	82581948	Chst11
chr10	83516347	83517049	1500009L16Rik
chr10	84936280	84936777	Btbd11
chr10	88068626	88069255	Mybpc1
chr10	89905721	89906432	Anks1b
chr10	90062617	90063414	Anks1b
chr10	90100034	90101217	Anks1b
chr10	90704318	90704793	Tmpo
chr10	93921332	93921960	Tmcc3
chr10	94546250	94546834	Gm29684
chr10	94547831	94549081	Gm29684
chr10	95191833	95193111	Nudt4
chr10	95736637	95737233	4930459C07Rik
chr10	95923192	95923763	Btg1
chr10	96295786	96296345	4930556N09Rik
chr10	98569020	98569787	Poc1b
chr10	98845642	98846224	Dusp6
chr10	99023443	99024352	Gm20110
chr10	99388988	99389833	Kitl
chr10	99480240	99480993	Kitl
chr10	105369716	105370396	Ccdc59
chr10	105370515	105370868	Ccdc59
chr10	105691173	105691784	Ppfia2
chr10	105935066	105935704	Ppfia2
chr10	106085724	106086300	4930532I03Rik
chr10	106340276	106340792	Acss3
chr10	106918853	106919807	Myf5
chr10	107034080	107034599	Myf6
chr10	108569204	108569778	Syt1
chr10	109437977	109438447	Nav3
chr10	109759006	109759578	9230102K24Rik
chr10	110315599	110316089	1700020G17Rik
chr10	111018909	111019840	4933440J02Rik
chr10	111264078	111264765	Gm20758
chr10	115043619	115044419	Lgr5
chr10	116248370	116249008	4930579P08Rik
chr10	119254456	119254926	Grip1
chr10	119256909	119257382	Grip1
chr10	120296585	120297103	Gm15910
chr10	120947243	120947662	Rassf3
chr10	121959682	121960181	A130077B15Rik
chr10	126342781	126343170	Xrcc6bp1
chr10	128184553	128185501	Pym1
chr11	3083147	3083319	Sfi1
chr11	3197745	3198390	Patz1
chr11	3746499	3747589	Osbp2
chr11	4578103	4579177	Uqcr10
chr11	5120797	5121456	Kremen1
chr11	6784286	6784988	Gm11981
chr11	7075312	7076241	Gm11985
chr11	7111884	7112598	Igfbp3
chr11	7137546	7138382	Igfbp3
chr11	11785494	11786192	Ddc
chr11	11848102	11849259	Ddc
chr11	11932806	11933474	Grb10
chr11	12711320	12711968	Cobl
chr11	12988312	12989179	Cobl
chr11	13491018	13491593	4930554G24Rik
chr11	13671102	13671533	4930554G24Rik
chr11	13785680	13786191	4930554G24Rik
chr11	13875087	13876109	4930554G24Rik
chr11	13969669	13970120	4930554G24Rik
chr11	16506603	16507256	Sec61g
chr11	16691273	16692153	Egfr
chr11	16805024	16805885	Eldr
chr11	16952369	16952737	Cnrip1
chr11	17349309	17350610	C1d
chr11	17551408	17552081	Etaa1
chr11	17650317	17650704	Etaa1
chr11	18045558	18046342	Gm12018
chr11	18890008	18890805	Meis1
chr11	19289036	19289735	4933406G16Rik
chr11	19886638	19887225	Spred2
chr11	20539758	20540376	Sertad2
chr11	22187198	22188102	Ehbp1
chr11	22247112	22248149	Ehbp1
chr11	22412256	22412965	Tmem17
chr11	22517345	22518016	Tmem17
chr11	22834662	22834993	Zrsr1
chr11	28751987	28753337	Efemp1
chr11	29214682	29215146	Ccdc88a
chr11	29537608	29538923	Rtn4
chr11	30068046	30069114	Sptbn1
chr11	30076208	30076637	Sptbn1
chr11	31727733	31728449	D630024D03Rik
chr11	33412991	33413496	Ranbp17
chr11	34866705	34867464	Slit3
chr11	39533444	39533814	4930553C11Rik
chr11	40503966	40504349	Mat2b
chr11	41042343	41042789	Ccng1
chr11	41043180	41043663	Ccng1
chr11	45989686	45990490	Mir7239
chr11	46091544	46092725	Cyfip2
chr11	46101099	46102860	Cyfip2
chr11	47202185	47202680	Sgcd
chr11	49056888	49057642	Mgat1
chr11	50066582	50067294	Ltc4s
chr11	50256931	50257333	Rufy1
chr11	50661506	50662079	Grm6
chr11	51576748	51577360	Sar1b
chr11	52213414	52214173	9530068E07Rik
chr11	52881229	52882361	Gm11186
chr11	53035858	53036687	Hspa4
chr11	53333869	53335136	Sept8
chr11	54696137	54697081	Hint1
chr11	54829095	54829777	Anxa6
chr11	55017621	55018239	Slc36a1
chr11	55203374	55203697	Sparc
chr11	55219209	55220194	Sparc
chr11	56425386	56426052	Gria1
chr11	56432101	56432884	Gria1
chr11	57646714	57647326	Hand1
chr11	57775823	57776375	Larp1
chr11	58037008	58037669	Irgm2
chr11	59521661	59522148	1700007J10Rik
chr11	60022367	60023267	Mir6922
chr11	60267637	60268248	Drg2
chr11	61433766	61434337	Grap
chr11	62811012	62811765	Cdrt4os1
chr11	62948700	62949582	Pmp22
chr11	63417622	63418605	Hs3st3b1
chr11	63836124	63836603	Cox10
chr11	66821317	66822012	Tmem220
chr11	66823803	66824312	Tmem220
chr11	66831302	66831776	Tmem220
chr11	67274165	67275021	Gas7
chr11	67450152	67451031	Gas7
chr11	67451641	67452624	Gas7
chr11	67710430	67710832	Usp43
chr11	67934624	67935135	Mir6406
chr11	68084159	68085774	Mir6406
chr11	69393387	69394359	Trp53
chr11	69394425	69394957	Trp53
chr11	70265120	70265965	Med11
chr11	72146490	72147295	Fbxo39
chr11	75919985	75920473	Vps53
chr11	76208299	76208917	Nxn
chr11	76429195	76430258	Abr
chr11	76592842	76593635	Gosr1
chr11	77606646	77607329	Myo18a
chr11	77698001	77699143	Pipox
chr11	78114853	78115268	Spag5
chr11	78919292	78919844	Ksr1
chr11	79343990	79344807	Evi2a
chr11	79343990	79344807	Gm21975
chr11	79720271	79720767	Utp6
chr11	79955285	79956109	Tefm
chr11	80302715	80303260	Cdk5r1
chr11	81182730	81183567	1700071K01Rik
chr11	81736463	81736897	Asic2
chr11	85244189	85244727	Bcas3
chr11	85481034	85482007	Bcas3os1
chr11	86209089	86209495	Med13
chr11	86679504	86680887	Dhx40
chr11	86900019	86900606	Smg8
chr11	87863169	87864182	Srsf1
chr11	88046587	88047826	Mrps23
chr11	88207133	88207927	Mir378b
chr11	88684276	88684924	Akap1
chr11	89048597	89049369	Gm525
chr11	89154526	89155302	Nog
chr11	89337918	89338761	4932411E22Rik
chr11	89627732	89628781	Ankfn1
chr11	90098692	90099852	Mmd
chr11	90756178	90756701	4930405D11Rik
chr11	93829213	93829732	Nme1
chr11	94377597	94378011	Mycbpap
chr11	94405212	94405696	Rsad1
chr11	94850576	94851572	Ppp1r9b
chr11	95140598	95140939	Tac4
chr11	95876776	95877481	Gip
chr11	96636148	96637294	Snx11
chr11	97013073	97013935	Tbkbp1
chr11	97483766	97484175	E130012A19Rik
chr11	98449145	98449915	Ormdl3
chr11	98543699	98544419	Psmd3
chr11	99177884	99178468	Krt25
chr11	100223695	100224356	Hap1
chr11	100835845	100836731	Ptrf
chr11	100895997	100896558	Mir6928
chr11	102181239	102182357	Ubtf
chr11	104057045	104057419	Sppl2c
chr11	104472915	104473304	Itgb3
chr11	105666123	105666446	Cyb561
chr11	106841464	106842092	Kpna2
chr11	107512877	107513730	Mir6932
chr11	108009628	108010336	Mir7223
chr11	109406510	109407220	Arsg
chr11	109855394	109856058	Abca8b
chr11	110918598	110919428	Kcnj2
chr11	112840536	112841310	1700012H19Rik
chr11	113026223	113026910	2610035D17Rik
chr11	113075700	113076384	4732490B19Rik
chr11	113265666	113266209	Slc39a11
chr11	113407418	113408090	Slc39a11
chr11	115638816	115639675	Tmem94
chr11	116146992	116147614	Galr2
chr11	116675556	116676566	Mxra7
chr11	116977743	116978668	Sec14l1
chr11	117209161	117210373	Sept9
chr11	117516836	117517768	Tnrc6c
chr11	117589890	117590568	Tmc6
chr11	117829179	117829685	Socs3
chr11	119352372	119352993	Endov
chr11	119724089	119725721	Mir5098
chr11	119886075	119886491	Mir338
chr11	120098887	120099488	Bahcc1
chr11	120141492	120142772	Bahcc1
chr11	121508111	121509055	B3gntl1
chr12	3670262	3671039	Dtnb
chr12	5281208	5281911	Klhl29
chr12	7112118	7112657	1700101O22Rik
chr12	8108512	8109022	Ldah
chr12	8229690	8230203	Ldah
chr12	9249543	9250188	Ttc32
chr12	9955239	9956033	Osr1
chr12	9982902	9983397	Nt5c1b
chr12	10406642	10407292	Rdh14
chr12	10458196	10458774	Gm38407
chr12	10596236	10597018	Gm38407
chr12	11228345	11229196	Msgn1
chr12	13062948	13063598	Mycn
chr12	15623942	15624657	Mir6387
chr12	16860002	16860469	Rock2
chr12	16876763	16877993	Rock2
chr12	17225794	17226287	Kcnf1
chr12	25515796	25516295	Mboat2
chr12	26861146	26861639	Gm29687
chr12	27568955	27569446	Gm20187
chr12	27947939	27948634	Sox11
chr12	29360338	29361064	Adi1
chr12	29755310	29756003	Tssc1
chr12	30320167	30320925	C630031E19Rik
chr12	31542970	31543358	Fam150b
chr12	31818108	31818769	6030469F06Rik
chr12	32491611	32492113	Gpr22
chr12	33610804	33611430	4933406C10Rik
chr12	33746609	33747006	Cdhr3
chr12	36252730	36253406	Ahr
chr12	39570124	39571052	Etv1
chr12	39655072	39655963	Etv1
chr12	39950530	39951289	Etv1
chr12	41118885	41119829	Zfp277
chr12	41324322	41324788	Dock4
chr12	41352914	41353548	Dock4
chr12	41816604	41817038	Immp2l
chr12	41849473	41849954	Immp2l
chr12	42212070	42212865	Lrrn3
chr12	42939573	42940062	Lrrn3
chr12	43817163	43817780	Dnajb9
chr12	52209048	52209629	1700008C04Rik
chr12	53937050	53937649	Akap6
chr12	54015528	54016389	Akap6
chr12	54247460	54247966	Npas3
chr12	54324184	54325054	Npas3
chr12	54352619	54353125	Npas3
chr12	54470895	54471304	Npas3
chr12	54667645	54668500	Npas3
chr12	55121930	55122416	Egln3
chr12	55148841	55149970	Egln3
chr12	55255505	55255995	Egln3
chr12	55342944	55343497	1700104L18Rik
chr12	57335517	57336123	Gm19990
chr12	58229147	58229495	Slc25a21
chr12	60320046	60321160	Fbxo33
chr12	65933262	65933776	Gm527
chr12	70259813	70260270	Rps29
chr12	71122541	71122900	Sav1
chr12	71949836	71950777	Frmd6
chr12	71997199	71998891	Actr10
chr12	72070815	72071298	Psma3
chr12	72572764	72573338	4930404H11Rik
chr12	72601694	72602637	4930404H11Rik
chr12	72643655	72644925	4930404H11Rik
chr12	72931913	72932781	Daam1
chr12	74450372	74450862	D830013O20Rik
chr12	74468268	74469319	D830013O20Rik
chr12	75243115	75243490	1700086L19Rik
chr12	75891395	75892078	Kcnh5
chr12	77057428	77057949	Mir5101
chr12	78180148	78181079	Max
chr12	80540740	80541300	Rad51b
chr12	80589669	80590255	Rad51b
chr12	80858660	80859240	9430078K24Rik
chr12	81006550	81007439	9430078K24Rik
chr12	81050045	81050582	9430078K24Rik
chr12	85702310	85703332	Fam161b
chr12	88806985	88807458	Snw1
chr12	88813018	88813698	Snw1
chr12	90633730	90634219	Nrxn3
chr12	90926586	90927360	Nrxn3
chr12	91156781	91157141	Nrxn3
chr12	91403865	91404602	Nrxn3
chr12	92184545	92185076	5430427M07Rik
chr12	92304756	92305959	5430427M07Rik
chr12	92543457	92544529	Cep128
chr12	92638692	92639905	Tshr
chr12	92651142	92651915	Tshr
chr12	92726487	92727247	Bc1
chr12	93050929	93051620	Ston2
chr12	95634523	95634877	Mir8099-1
chr12	95634523	95634877	Mir8099-2
chr12	95929428	95930190	Mir8099-1
chr12	95929428	95930190	Mir8099-2
chr12	96042763	96043573	Mir8099-1
chr12	96042763	96043573	Mir8099-2
chr12	97643315	97644019	1700019M22Rik
chr12	98329787	98330308	1700019M22Rik
chr12	98721668	98722159	Galc
chr12	99346130	99346956	Galc
chr12	100546683	100547548	Foxn3
chr12	100582559	100583244	Foxn3
chr12	101122096	101123076	Tdp1
chr12	101616120	101616476	Gm10432
chr12	101659040	101659906	Ttc7b
chr12	103420967	103421370	Slc24a4
chr12	103421504	103421904	Slc24a4
chr12	103519043	103521039	Rin3
chr12	103529800	103530419	Rin3
chr12	103561166	103562143	Rin3
chr12	103562811	103563224	Rin3
chr12	104663821	104664400	Ddx24
chr12	106057247	106057873	Clmn
chr12	110915981	110916934	Mir882
chr12	111011910	111012653	Mir3072
chr12	111741882	111742740	Ppp2r5c
chr12	111795186	111795585	B930059L03Rik
chr12	111808906	111809769	B930059L03Rik
chr12	113376419	113377054	Mir203
chr12	113496940	113497366	Kif26a
chr12	113730168	113731125	A530016L24Rik
chr12	113910595	113911567	Akt1
chr12	118866724	118867100	Rapgef5
chr12	118983623	118984544	Cdca7l
chr12	119110664	119111405	Cdca7l
chr13	3669406	3670294	Asb13
chr13	3882493	3883041	Net1
chr13	4820317	4821261	Akr1e1
chr13	5018464	5018923	Akr1e1
chr13	5224609	5225087	Akr1e1
chr13	6156414	6157698	Klf6
chr13	6633841	6634532	Pfkp
chr13	7372457	7373363	Pfkp
chr13	7528309	7528983	Adarb2
chr13	8377477	8378005	Adarb2
chr13	9349807	9350211	Dip2c
chr13	15144958	15145539	Gli3
chr13	15520652	15521107	Gli3
chr13	15590015	15590470	Gli3
chr13	15603419	15604037	Gli3
chr13	21597992	21598556	Zfp389
chr13	21806694	21807652	Hist1h2bl
chr13	21810206	21811125	Hist1h3h
chr13	21845528	21846053	Hist1h2ak
chr13	23627041	23627354	Hist1h3g
chr13	23642616	23643747	Hist1h4f
chr13	23668106	23668945	Hist1h3d
chr13	23676893	23677423	Hist1h2be
chr13	23853321	23853816	Hist1h4a
chr13	24110471	24111023	Scgn
chr13	24657022	24658152	Fam65b
chr13	24709842	24710485	Fam65b
chr13	25569335	25569997	Nrsn1
chr13	28695667	28696267	Mir6368
chr13	28789431	28790533	Mir6368
chr13	28903017	28903421	2610307P16Rik
chr13	28947216	28947783	2610307P16Rik
chr13	29098039	29099005	A330102I10Rik
chr13	29441404	29441902	A330102I10Rik
chr13	30979414	30979971	Hus1b
chr13	31481733	31482218	4930401O12Rik
chr13	32083819	32084878	Foxc1
chr13	32358653	32359969	Gmds
chr13	32557658	32558111	Gmds
chr13	32609254	32609699	Gmds
chr13	32808535	32809279	Mylk4
chr13	34906554	34907118	Prpf4b
chr13	35280823	35281496	1700011B04Rik
chr13	35375855	35376149	1700019C18Rik
chr13	35481545	35482871	1700019C18Rik
chr13	35603650	35604649	Cdyl
chr13	37528091	37528993	Ly86
chr13	38907979	38908403	Slc35b3
chr13	40825895	40826440	Tfap2a
chr13	44608907	44609918	1700029N11Rik
chr13	44675155	44676627	1700029N11Rik
chr13	45127185	45127715	Dtnbp1
chr13	45514124	45515072	Mylip
chr13	45564803	45565634	Gmpr
chr13	46018369	46018818	Atxn1
chr13	46312740	46313236	Stmnd1
chr13	46629565	46630783	Cap2
chr13	47004627	47005494	Kif13a
chr13	47657977	47658465	G630093K05Rik
chr13	48709963	48710871	Ptpdc1
chr13	49747652	49748853	Cenpp
chr13	51113302	51114447	9430083A17Rik
chr13	52379271	52379656	4921525O09Rik
chr13	53103850	53104690	Nfil3
chr13	54709509	54710472	Cltb
chr13	54901107	54901624	Tspan17
chr13	55275464	55276488	Fgfr4
chr13	60248288	60249160	Gas1
chr13	60466298	60466893	Gm5084
chr13	60510969	60511797	Dapk1
chr13	61033906	61034616	Ctla2a
chr13	63198773	63199170	2010111I01Rik
chr13	63213914	63215022	2010111I01Rik
chr13	63257457	63258258	2010111I01Rik
chr13	64317251	64318627	Cdc14b
chr13	69750312	69751335	Nsun2
chr13	70254564	70255516	1700084F23Rik
chr13	71807592	71807856	Irx1
chr13	72416816	72417762	Irx1
chr13	73959623	73959919	Nkd2
chr13	78239232	78239870	Pou5f2
chr13	81699653	81700112	Adgrv1
chr13	84587812	84589226	Tmem161b
chr13	89809027	89809836	Vcan
chr13	90392749	90393252	Tmem167
chr13	90653411	90653971	Atp6ap1l
chr13	91036331	91037189	Atp6ap1l
chr13	91510291	91511163	A830009L08Rik
chr13	92979830	92980555	Rasgrf2
chr13	94952642	94953890	Scamp1
chr13	95260703	95260960	Ap3b1
chr13	97780129	97780725	1700029F12Rik
chr13	98274315	98275088	Lncenc1
chr13	98725730	98726289	Arhgef28
chr13	99061707	99062272	Btf3
chr13	99062680	99063582	Btf3
chr13	99863046	99863672	2310020H05Rik
chr13	99894595	99895358	2310020H05Rik
chr13	100718549	100718992	Cartpt
chr13	102209650	102210114	4922502H24Rik
chr13	102494669	102494991	Pik3r1
chr13	102528130	102528782	Pik3r1
chr13	103021608	103022008	Cd180
chr13	103121853	103122366	Cd180
chr13	103745305	103746170	1700099I09Rik
chr13	104760357	104760975	Erbb2ip
chr13	104768178	104769068	Erbb2ip
chr13	104814909	104815804	Nln
chr13	105076956	105077360	Adamts6
chr13	105412154	105412803	Cwc27
chr13	105445262	105445788	Cwc27
chr13	105606949	105607554	Srek1ip1
chr13	107751545	107751926	Dimt1
chr13	108725763	108726367	Zswim6
chr13	109125298	109126024	Depdc1b
chr13	110367544	110368143	Mir582
chr13	110442310	110443084	Mir1904
chr13	110452908	110453375	Mir1904
chr13	110475557	110476078	Mir1904
chr13	110484336	110484785	Mir1904
chr13	110657268	110657661	Mir1904
chr13	110814517	110815243	Mir1904
chr13	111615007	111615487	Gm38397
chr13	112694905	112695514	Gm15326
chr13	112954284	112954789	Ankrd55
chr13	112959589	112960069	Ankrd55
chr13	113215352	113216288	Il6st
chr13	113512440	113513003	Slc38a9
chr13	113560736	113561485	Plpp1
chr13	114584462	114585041	Arl15
chr13	115608168	115608973	Mocs2
chr13	118996959	118997585	Mrps30
chr14	9164590	9165408	Fam107a
chr14	9860824	9861308	4930455B14Rik
chr14	9862078	9862738	4930455B14Rik
chr14	12003016	12004377	Fhit
chr14	16416276	16416640	Lrrc3b
chr14	20620249	20621309	2700060E02Rik
chr14	21725379	21725863	Vcl
chr14	22480767	22481458	Dupd1
chr14	22667640	22668506	Comtd1
chr14	24452687	24453321	Kcnma1
chr14	24533965	24534412	Kcnma1
chr14	26045847	26046616	4930572O13Rik
chr14	26525020	26525727	Ppifos
chr14	26532624	26533510	Ppifos
chr14	29161896	29162363	Wnt5a
chr14	30042550	30043335	Lrtm1
chr14	31764028	31764944	Nek4
chr14	33015030	33015515	Parg
chr14	33223179	33224099	1700024G13Rik
chr14	33337065	33337671	Ercc6
chr14	35048127	35048778	Syt15
chr14	41751604	41752347	Tspan14
chr14	46403739	46404393	Ddhd1
chr14	48865752	48866383	Gm6498
chr14	49071284	49072164	Tmem260
chr14	51550681	51551168	Tmem55b
chr14	52877129	52877886	Chd8
chr14	54873255	54874289	Abhd4
chr14	55355673	55357039	Cebpe
chr14	55359711	55361062	Cebpe
chr14	60553400	60553883	Atp8a2
chr14	63455832	63456461	Wdfy2
chr14	64300401	64300753	Mir598
chr14	64986772	64987430	Msra
chr14	67113301	67113848	Adra1a
chr14	68368424	68368923	Gnrh1
chr14	68534872	68536403	Dock5
chr14	69599116	69600113	Stc1
chr14	70134211	70134783	4930480K23Rik
chr14	70977429	70978023	Nudt18
chr14	73852774	73853441	Med4
chr14	74544823	74545498	4933402J15Rik
chr14	75071417	75072473	Htr2a
chr14	76410249	76411183	Gtf2f2
chr14	76681625	76682111	Tsc22d1
chr14	77098536	77099239	1700108F19Rik
chr14	77180767	77181377	1700108F19Rik
chr14	77236696	77237320	1700108F19Rik
chr14	77239872	77240329	1700108F19Rik
chr14	77560758	77561588	Enox1
chr14	78033977	78034603	Gm6994
chr14	78417714	78418657	Fam216b
chr14	78859091	78859814	Akap11
chr14	79731643	79732347	Rgcc
chr14	82837654	82838301	Pcdh17
chr14	85268695	85269045	9630013A20Rik
chr14	86728638	86729448	4930529K09Rik
chr14	86830354	86831490	4930529K09Rik
chr14	87042681	87043247	4930529K09Rik
chr14	91316102	91316755	4930474H20Rik
chr14	93656437	93657222	Pcdh9
chr14	93687402	93688041	Pcdh9
chr14	96488035	96488505	4921530L21Rik
chr14	99107217	99108043	Mzt1
chr14	99879694	99880360	Klf5
chr14	102242175	102243293	Lmo7
chr14	102615709	102616777	Lmo7
chr14	105776159	105777265	5430440P10Rik
chr14	109072840	109073478	Slitrk1
chr14	110290465	110291274	Slitrk6
chr14	110717743	110718452	Slitrk6
chr14	116896492	116896861	Gpc6
chr14	117337519	117337847	Gpc6
chr14	120754299	120755325	Mbnl2
chr14	121157419	121158360	Ipo5
chr14	121267505	121268098	Ipo5
chr14	121511236	121511848	Farp1
chr14	121955446	121956344	Slc15a1
chr15	3910134	3910572	Fbxo4
chr15	4104487	4105225	BC037032
chr15	7102276	7102785	Lifr
chr15	8058888	8059734	Nup155
chr15	9064555	9065477	Skp2
chr15	9081675	9082144	Skp2
chr15	9554218	9554795	Il7r
chr15	10393369	10393807	Dnajc21
chr15	10869544	10870390	C1qtnf3
chr15	10881548	10881895	C1qtnf3
chr15	10882011	10882523	C1qtnf3
chr15	11040937	11041852	Adamts12
chr15	11068641	11069445	Adamts12
chr15	11095604	11096063	Adamts12
chr15	11623551	11624070	Npr3
chr15	11843778	11844464	Npr3
chr15	13204984	13205828	Cdh6
chr15	19594210	19594535	Cdh10
chr15	25507212	25508012	Myo10
chr15	25536291	25537185	Myo10
chr15	25610009	25610946	Myo10
chr15	25886243	25887123	Mir7212
chr15	26883131	26883983	Fbxl7
chr15	26888572	26889272	Fbxl7
chr15	27712263	27712964	Fam105a
chr15	27740639	27741261	Fam105a
chr15	27955406	27956199	Trio
chr15	29571015	29571567	Mir3964
chr15	33259546	33260388	1700084J12Rik
chr15	34167542	34168183	Laptm4b
chr15	35677907	35678507	Mir875
chr15	39757431	39757873	Lrp12
chr15	39946064	39946686	9330182O14Rik
chr15	40090933	40091705	9330182O14Rik
chr15	40860867	40861749	Zfpm2
chr15	40903338	40903995	Oxr1
chr15	42239561	42240232	Angpt1
chr15	42260815	42261592	Angpt1
chr15	43416390	43417453	Emc2
chr15	43549750	43550190	Tmem74
chr15	48216696	48217305	Csmd3
chr15	48252786	48253376	Csmd3
chr15	51696839	51697372	Eif3h
chr15	51832306	51832920	Rad21
chr15	52557370	52557756	Med30
chr15	52759792	52760383	Med30
chr15	52956632	52957226	Ext1
chr15	53090673	53091162	Ext1
chr15	53114612	53115148	Ext1
chr15	54236230	54236983	Colec10
chr15	54531551	54532072	Nov
chr15	54622659	54623188	Nov
chr15	54943781	54945388	Gm9920
chr15	55027885	55028376	Deptor
chr15	55246991	55247663	Col14a1
chr15	55681416	55682314	Sntb1
chr15	58051918	58052388	Fbxo32
chr15	58745669	58746017	Tatdn1
chr15	58889729	58890282	Mtss1
chr15	59654155	59655166	Gm19510
chr15	60408329	60409063	9930014A18Rik
chr15	62293904	62294857	H2afy3
chr15	62790916	62791476	Gm20740
chr15	64940912	64941701	Adcy8
chr15	65255374	65256019	Efr3a
chr15	66547031	66547621	Tg
chr15	66649773	66650776	Sla
chr15	67007889	67008644	St3gal1
chr15	67059380	67059982	1700012I11Rik
chr15	71410619	71411188	Fam135b
chr15	71440824	71441436	Fam135b
chr15	72962397	72962864	Chrac1
chr15	75618990	75619908	Mafa
chr15	75659082	75660579	Zc3h3
chr15	75740403	75741180	Tigd5
chr15	76037203	76038349	Plec
chr15	76315575	76316089	Hsf1
chr15	76778696	76779262	1110038F14Rik
chr15	77711907	77712697	Myh9
chr15	79927887	79928546	Syngr1
chr15	80094618	80094986	Rps19bp1
chr15	81124661	81126174	8430426J06Rik
chr15	81846630	81847270	Xrcc6
chr15	81932797	81933473	Mei1
chr15	84044569	84045052	Parvb
chr15	84175604	84176083	Parvg
chr15	84242829	84243427	1810041L15Rik
chr15	84659552	84660248	Phf21b
chr15	84734308	84734947	Nup50
chr15	86019341	86019876	Cerk
chr15	86095313	86095849	Tbc1d22a
chr15	88673952	88674597	Pim3
chr15	89026479	89027379	Dennd6b
chr15	90922738	90923314	Kif21a
chr15	93348539	93349223	Prickle1
chr15	93757197	93757611	9430014N10Rik
chr15	93927154	93928169	D630010B17Rik
chr15	94040306	94041147	D630010B17Rik
chr15	94373514	94374297	Pus7l
chr15	95676226	95676975	Ano6
chr15	96682229	96683432	Slc38a2
chr15	96793565	96794513	Slc38a4
chr15	96874264	96875058	Slc38a4
chr15	98367261	98367857	Kansl2
chr15	100906239	100907033	Fignl2
chr15	102054553	102055250	Itgb7
chr15	102180972	102181428	Aaas
chr15	102300606	102300998	Pcbp2
chr15	102560685	102561350	Calcoco1
chr16	4413354	4414410	Adcy9
chr16	5496218	5496820	Eef2kmt
chr16	5616371	5617236	Rbfox1
chr16	9586120	9586733	Grin2a
chr16	12511401	12511837	1700003L19Rik
chr16	12694640	12695488	1700003L19Rik
chr16	12792287	12793066	1700003L19Rik
chr16	12795685	12796413	1700003L19Rik
chr16	13644599	13645033	Parn
chr16	13863854	13864353	Pdxdc1
chr16	15070664	15071444	Efcab1
chr16	18249657	18250211	Trmt2a
chr16	18461967	18462472	Comt
chr16	20387296	20388083	Abcc5
chr16	21352603	21353570	Magef1
chr16	21653762	21654214	2510009E07Rik
chr16	21687553	21688030	2510009E07Rik
chr16	25064424	25064961	A230028O05Rik
chr16	25439991	25440569	Tprg
chr16	25445522	25446275	Tprg
chr16	26025704	26026148	P3h2
chr16	26041356	26042101	P3h2
chr16	28866473	28867047	Mb21d2
chr16	29950163	29950856	Gm1968
chr16	30248419	30248939	Cpn2
chr16	30252013	30252677	Cpn2
chr16	30317863	30318558	Gp5
chr16	30475495	30477046	Tmem44
chr16	30987686	30988594	Xxylt1
chr16	33126974	33127709	Mir1947
chr16	33380558	33381593	Zfp148
chr16	33907931	33908852	Umps
chr16	35250548	35251299	Adcy5
chr16	35255558	35256687	Adcy5
chr16	39746419	39747076	Igsf11
chr16	40982180	40983695	Lsamp
chr16	41827328	41827840	Lsamp
chr16	41975064	41976049	Mir6540
chr16	42152183	42153136	Mir6540
chr16	42190174	42191054	Mir6540
chr16	42444313	42445206	Gap43
chr16	42702457	42703207	4932412D23Rik
chr16	43574228	43575211	Mir568
chr16	44108741	44109450	Atp6v1a
chr16	44483045	44483533	Mir3081
chr16	44484238	44485163	Mir3081
chr16	45336356	45337085	Cd200
chr16	45838011	45838909	Phldb2
chr16	46097130	46097814	Cd96
chr16	46144152	46145124	Gm4737
chr16	46293744	46294221	Gm4737
chr16	46389230	46389781	Pvrl3
chr16	46782220	46783128	Pvrl3
chr16	47475374	47475899	Dppa4
chr16	47536455	47537068	Dppa4
chr16	48646152	48646790	Trat1
chr16	49607934	49608675	Ift57
chr16	50674105	50674860	Mir6363
chr16	51048169	51049278	1700116B05Rik
chr16	51521236	51522185	Cblb
chr16	55838626	55839466	Nfkbiz
chr16	56613982	56614952	Tfg
chr16	57309330	57309972	Tmem30c
chr16	57606731	57607146	Cmss1
chr16	57764107	57764973	Col8a1
chr16	57765086	57765577	Col8a1
chr16	59835739	59836561	Arl6
chr16	64699940	64700293	4930453N24Rik
chr16	65825320	65825900	Vgll3
chr16	65839510	65840041	Vgll3
chr16	65917941	65918727	Vgll3
chr16	65954730	65955324	Vgll3
chr16	66000899	66002179	Vgll3
chr16	66437259	66437864	1700010K23Rik
chr16	67106282	67106801	1700010K23Rik
chr16	68352061	68352542	Cadm2
chr16	69803028	69803346	4930428D20Rik
chr16	70091334	70091808	Gbe1
chr16	70722253	70722845	D16Ertd519e
chr16	70724675	70725591	D16Ertd519e
chr16	71337804	71338236	4930567J20Rik
chr16	73105637	73106410	Robo1
chr16	73379199	73379731	Robo1
chr16	76255605	76256255	Nrip1
chr16	76352695	76353304	Nrip1
chr16	76644372	76645001	Nrip1
chr16	76817316	76817805	1700041M19Rik
chr16	78224643	78225246	E330011O21Rik
chr16	78811950	78812596	Chodl
chr16	85879129	85879648	Adamts5
chr16	85887226	85888530	Adamts5
chr16	86142494	86143748	Adamts5
chr16	86930648	86931121	N6amt1
chr16	87032123	87032725	N6amt1
chr16	87213093	87213658	N6amt1
chr16	87225837	87226842	N6amt1
chr16	87319287	87319599	N6amt1
chr16	87383165	87383958	N6amt1
chr16	90127516	90128087	Gm10789
chr16	91338348	91339582	Ifnar2
chr16	92234551	92235380	Kcne2
chr16	92248105	92248854	Kcne2
chr16	92709790	92710291	Runx1
chr16	93449933	93450702	1700029J03Rik
chr16	93587369	93587955	Setd4
chr16	95003249	95004325	Kcnj6
chr16	95193795	95194382	Kcnj6
chr16	95583830	95584355	Erg
chr16	96220623	96221104	Psmg1
chr17	3690431	3691042	Nox3
chr17	5295477	5295981	Ldhal6b
chr17	5611992	5612700	Zdhhc14
chr17	5770208	5770906	3300005D01Rik
chr17	5806617	5807110	3300005D01Rik
chr17	7373705	7374586	Rps6ka2
chr17	8476278	8476734	Mpc1
chr17	9414044	9414931	6530411M01Rik
chr17	10233201	10233942	4930452A19Rik
chr17	10278914	10279577	Qk
chr17	10512759	10513297	Cahm
chr17	11736435	11737207	D17Ertd648e
chr17	14509457	14510106	4930474M22Rik
chr17	16114300	16114973	Rgmb
chr17	16118566	16118998	Rgmb
chr17	16624792	16625604	Zfp960
chr17	17545132	17545649	Lix1
chr17	21512015	21512660	Zfp677
chr17	21512990	21513343	Zfp677
chr17	21600558	21601102	Zfp51
chr17	21671305	21671868	Zfp52
chr17	21883056	21883737	Zfp229
chr17	24306301	24306905	Atp6v0c
chr17	26380931	26381737	Fam234a
chr17	28858962	28859652	Mapk14
chr17	29175953	29176761	Srsf3
chr17	30683675	30684747	Btbd9
chr17	32119404	32120195	Hsf2bp
chr17	33084234	33084632	Cyp4f13
chr17	33167800	33168251	Zfp763
chr17	35810555	35810953	Gtf2h4
chr17	35874502	35875155	Ddr1
chr17	36133910	36134184	A930015D03Rik
chr17	42847982	42848461	Adgrf4
chr17	42878595	42879208	Adgrf2
chr17	43112386	43112846	Tnfrsf21
chr17	43755120	43755774	Tdrd6
chr17	44130884	44131439	Rcan2
chr17	44846812	44847262	Runx2
chr17	44907684	44908140	Supt3
chr17	44913701	44914194	Supt3
chr17	45345884	45346389	Cdc5l
chr17	45377984	45378772	Cdc5l
chr17	45383653	45384601	Cdc5l
chr17	47874749	47875378	Tfeb
chr17	49488500	49488971	Gm17830
chr17	56357709	56358688	Dpp9
chr17	59521718	59522212	Nudt12
chr17	60996728	60997213	Nudt12
chr17	62787052	62787902	Efna5
chr17	63534576	63535387	4930405O22Rik
chr17	63540340	63541115	4930405O22Rik
chr17	64904261	64905100	AU016765
chr17	66699945	66700554	Mtcl1
chr17	67934624	67935233	Lrrc30
chr17	68338101	68338731	Arhgap28
chr17	68424348	68424718	Arhgap28
chr17	68424915	68425545	Arhgap28
chr17	70938324	70939016	Dlgap1
chr17	74160675	74161185	Ehd3
chr17	75195141	75195923	Ttc27
chr17	75256462	75257194	Ttc27
chr17	75448688	75449158	Ltbp1
chr17	78678487	78678954	Crim1
chr17	78725115	78726168	Fez2
chr17	78786385	78787608	Fez2
chr17	78800975	78801528	Fez2
chr17	81290908	81291304	C230072F16Rik
chr17	81339171	81339621	Tmem178
chr17	81790704	81791309	Thumpd2
chr17	81923547	81924806	Slc8a1
chr17	82598367	82599093	Slc8a1
chr17	83063870	83064888	Gm19689
chr17	83519965	83521444	Gm19689
chr17	84353785	84354503	8430430B14Rik
chr17	84450518	84451192	4933433H22Rik
chr17	86084285	86085654	Six2
chr17	86088410	86089069	Six2
chr17	86203080	86203554	Six2
chr17	86280320	86280851	Six2
chr17	86435391	86435827	Srbd1
chr17	86435913	86436460	Srbd1
chr17	87305450	87305869	Tmem247
chr17	88494743	88495246	Gm4832
chr17	88957816	88958526	Ppp1r21
chr17	89624822	89625498	Fshr
chr17	95148579	95149411	Mettl4
chr18	4708522	4708993	9430020K01Rik
chr18	5562326	5562790	Zeb1
chr18	5684559	5685334	Gm10125
chr18	9957756	9958470	Thoc1
chr18	12041757	12042394	Mir1901
chr18	13534311	13535276	Hrh4
chr18	13945881	13946714	Zfp521
chr18	15179775	15180628	4933424G05Rik
chr18	16867371	16867959	Cdh2
chr18	17047427	17048014	Gm15328
chr18	22351694	22352025	Ccdc178
chr18	23603794	23604259	Dtna
chr18	23612571	23613082	Dtna
chr18	23728651	23729109	Dtna
chr18	23735860	23736484	Dtna
chr18	24024923	24025892	Mapre2
chr18	24145380	24145749	Zfp35
chr18	24903301	24903733	Fhod3
chr18	25008800	25009613	Fhod3
chr18	25021145	25022087	Fhod3
chr18	26252580	26253135	Celf4
chr18	27700484	27701059	4930474G06Rik
chr18	27709370	27709749	4930474G06Rik
chr18	27997760	27999133	4930474G06Rik
chr18	28993470	28994338	4930474G06Rik
chr18	30771243	30772015	Pik3c3
chr18	31118248	31119413	Rit2
chr18	31918796	31919593	Ammecr1l
chr18	33669908	33670482	Gm10549
chr18	34008724	34009431	Epb41l4aos
chr18	34067626	34068130	Epb41l4a
chr18	34164293	34164782	Epb41l4a
chr18	34936166	34936616	Kdm3b
chr18	35205107	35205725	Ctnna1
chr18	35648028	35649041	Sil1
chr18	36507773	36508531	Cystm1
chr18	36719162	36720919	Ankhd1
chr18	37803622	37804235	Taf7
chr18	37965767	37966343	Pcdhgc3
chr18	37972599	37973588	Pcdhgc4
chr18	38241944	38242401	Arap3
chr18	38529902	38531223	Gnpda1
chr18	39151929	39153424	Arhgap26
chr18	40262725	40263543	Yipf5
chr18	40290688	40291317	Yipf5
chr18	42170474	42171025	Grxcr2
chr18	42268893	42269768	Sh3rf2
chr18	42926286	42927245	Ppp2r2b
chr18	44739980	44740402	A930012L18Rik
chr18	45902946	45903795	Kcnn2
chr18	46815776	46816607	Eif1a
chr18	46987084	46987619	Lvrn
chr18	48102284	48102789	G630055G22Rik
chr18	48732290	48732915	Eno1b
chr18	49216229	49216879	1700044K03Rik
chr18	52951264	52951923	Sncaip
chr18	53785600	53786209	Gm19466
chr18	53786970	53787486	Gm19466
chr18	53926277	53926841	Cep120
chr18	54277665	54278378	Csnk1g3
chr18	54279154	54280213	Csnk1g3
chr18	54414884	54415366	Redrum
chr18	55132307	55133090	Zfp608
chr18	55145146	55146117	Zfp608
chr18	55407822	55408553	Zfp608
chr18	55783272	55784469	Zfp608
chr18	58265688	58266129	Fbn2
chr18	61046455	61046941	Arsi
chr18	62203048	62203693	Sh3tc2
chr18	65315432	65317565	Mir122
chr18	65752477	65753335	Zfp532
chr18	69825638	69826567	Ccdc68
chr18	70043574	70044373	Ccdc68
chr18	70200081	70200841	Rab27b
chr18	70212905	70213519	Rab27b
chr18	70857487	70857974	Mbd2
chr18	72208435	72208865	Dcc
chr18	74161617	74162291	D730045A05Rik
chr18	75564811	75565832	Smad7
chr18	76250070	76250691	2900057B20Rik
chr18	76256943	76257346	2900057B20Rik
chr18	77293546	77294001	Katnal2
chr18	78208218	78209055	Siglec15
chr18	78644808	78645344	Slc14a2
chr18	78743786	78744351	Slc14a2
chr18	80833679	80834448	Nfatc1
chr18	82981659	82982437	4930445N18Rik
chr18	83078717	83079417	Zfp516
chr18	83121240	83121808	4930592I03Rik
chr19	4201397	4202034	Rad9a
chr19	4476702	4477248	Syt12
chr19	5040879	5041805	Brms1
chr19	6077125	6077682	Vps51
chr19	6334487	6335174	Men1
chr19	7015813	7016324	Gpr137
chr19	10462795	10463910	Syt7
chr19	10955850	10956680	Tmem109
chr19	14965208	14965490	Tle4
chr19	20464739	20465435	Anxa1
chr19	21445204	21445817	Zfand5
chr19	22889578	22890126	Mir204
chr19	22922023	22922628	Mir204
chr19	22925382	22926150	Mir204
chr19	22979536	22979992	Mir204
chr19	24858086	24858563	Pgm5
chr19	24887137	24887910	Pgm5
chr19	25007534	25008230	Snora19
chr19	25728621	25729625	2610016A17Rik
chr19	25747957	25748705	Dmrt2
chr19	25755088	25756719	Dmrt2
chr19	25997933	25998977	Dmrt2
chr19	26165525	26167355	Dmrt2
chr19	26259192	26260605	Smarca2
chr19	27336243	27336767	Vldlr
chr19	27471317	27471604	Pum3
chr19	27504160	27505023	C030016D13Rik
chr19	27933451	27933951	Rfx3
chr19	29884270	29885487	Ranbp6
chr19	29974720	29975337	Il33
chr19	30105727	30106246	Uhrf2
chr19	30174292	30174951	Uhrf2
chr19	30279699	30280244	Mbl2
chr19	31135846	31136567	Cstf2t
chr19	31148320	31149154	Cstf2t
chr19	31157097	31158175	Cstf2t
chr19	31499471	31500266	8430431K14Rik
chr19	32544560	32544927	Minpp1
chr19	32776450	32777161	Atad1
chr19	32984482	32985217	Pten
chr19	36173334	36173817	Rpp30
chr19	37610573	37611384	Exoc6
chr19	38312198	38313161	Fra10ac1
chr19	41870801	41871721	Arhgap19
chr19	43222245	43222760	Hpse2
chr19	44340851	44341748	Scd2
chr19	44992579	44993096	Fam178a
chr19	45002805	45003773	Fam178a
chr19	45106270	45106854	Pdzd7
chr19	45462880	45463446	Btrc
chr19	45823521	45824214	Npm3
chr19	46222937	46223935	Pitx3
chr19	46922710	46923358	Cnnm2
chr19	47124797	47125609	Pcgf6
chr19	47375594	47376233	Mir6995
chr19	47516519	47516901	Sh3pxd2a
chr19	50562207	50562609	Sorcs1
chr19	51337880	51338481	Sorcs1
chr19	51556568	51557235	Ins1
chr19	53500801	53501186	Smndc1
chr19	53793924	53794299	Rbm20
chr19	53837134	53837643	Rbm20
chr19	53874750	53875373	Pdcd4
chr19	55368409	55369340	Zdhhc6
chr19	55709946	55710453	4930552P12Rik
chr19	55722091	55722816	4930552P12Rik
chr19	55821656	55822717	Tcf7l2
chr19	55823779	55824361	Tcf7l2
chr19	55900163	55901505	Tcf7l2
chr19	56111929	56112532	Tcf7l2
chr19	56251409	56252097	Habp2
chr19	56448209	56449105	Nrap
chr19	56809562	56810138	Adrb1
chr19	57014245	57014748	Vwa2
chr19	57273105	57274224	Ablim1
chr19	57627487	57628151	6720468P15Rik
chr19	57961462	57962166	Mir5623
chr19	58015555	58016486	Mir5623
chr19	58091270	58092407	Mir5623
chr19	60750984	60751453	Nanos1
chr2	3600833	3601490	Fam107b
chr2	4221494	4222053	Frmd4a
chr2	4483843	4484396	Frmd4a
chr2	6771297	6771885	Celf2
chr2	6832272	6832785	5031426D15Rik
chr2	8034011	8034836	Celf2
chr2	9877116	9878288	9230102O04Rik
chr2	9917572	9918301	Taf3
chr2	11085646	11086233	Prkcq
chr2	13491865	13492924	Vim
chr2	14048972	14049738	Tmem236
chr2	16584301	16584960	Plxdc2
chr2	17978584	17979163	Mir7655
chr2	18757937	18758667	Carlr
chr2	18760810	18761518	Carlr
chr2	20484305	20485189	Etl4
chr2	20563956	20564860	Etl4
chr2	26164320	26165881	Gpsm1
chr2	26819606	26820321	Rexo4
chr2	27665224	27666371	Col5a1
chr2	28496570	28496940	Tsc1
chr2	29493395	29494046	Rapgef1
chr2	29932731	29933390	Pkn3
chr2	30384422	30385249	Ier5l
chr2	31182741	31183129	Ncs1
chr2	31496179	31496814	Prdm12
chr2	31646586	31647759	Qrfp
chr2	32022283	32023612	Prrc2b
chr2	32092655	32093042	Pomt1
chr2	33299912	33300258	Zbtb34
chr2	34105027	34105486	Pbx3
chr2	34201660	34202560	Pbx3
chr2	35524723	35525252	Dab2ip
chr2	35592552	35593256	Dab2ip
chr2	35753931	35755333	9030204H09Rik
chr2	35761783	35762213	Ttll11
chr2	35995744	35996602	Rbm18
chr2	37685315	37686191	Crb2
chr2	38140348	38141497	Dennd1a
chr2	38678505	38679255	Mir181a-2
chr2	44922602	44923133	Zeb2
chr2	48424169	48424748	Acvr2a
chr2	48472484	48473386	Acvr2a
chr2	48475834	48476496	Acvr2a
chr2	49669050	49669606	Lypd6b
chr2	49777236	49778171	Lypd6b
chr2	50911600	50911930	Rnd3
chr2	51089771	51090348	Gm13497
chr2	52871720	52872326	Fmnl2
chr2	56399718	56400217	Mir195b
chr2	56968146	56968663	Nr4a2
chr2	59220479	59221015	5330411J11Rik
chr2	59530674	59531825	Tanc1
chr2	59556700	59557109	Tanc1
chr2	60765105	60765839	Rbms1
chr2	60778216	60778913	Rbms1
chr2	64085950	64086538	Fign
chr2	66960170	66960867	Gm1322
chr2	68109466	68110116	B3galt1
chr2	70467400	70467942	Gorasp2
chr2	71312359	71312772	Metap1d
chr2	71352783	71353603	Dlx1
chr2	72066841	72067414	Zak
chr2	77213799	77214645	Gm13944
chr2	77842418	77843414	4930440I19Rik
chr2	78496892	78497285	Ube2e3
chr2	78800865	78801685	Ube2e3
chr2	78826869	78827602	Ube2e3
chr2	79226038	79226528	Cerkl
chr2	79438957	79439570	Ssfa2
chr2	79445741	79446424	Ssfa2
chr2	79822991	79824245	Pde1a
chr2	82355235	82355743	Zfp804a
chr2	84527077	84527615	Tmx2
chr2	84699691	84700400	Slc43a1
chr2	90423845	90424347	Ptprj
chr2	90500866	90502203	Nup160
chr2	91203598	91204336	1110051M20Rik
chr2	91844599	91845329	Creb3l1
chr2	91848292	91849140	Creb3l1
chr2	93542235	93543606	Alx4
chr2	94532671	94533180	Api5
chr2	94823651	94824090	Api5
chr2	95280831	95281548	Lrrc4c
chr2	98506394	98506481	Lrrc4c
chr2	101979585	101980085	Ldlrad3
chr2	102181969	102183268	Trim44
chr2	102543610	102544187	Slc1a2
chr2	102783975	102784614	Cd44
chr2	105152073	105152612	Rcn1
chr2	105238717	105239856	Rcn1
chr2	109350710	109351205	Bdnf
chr2	109969510	109970545	Ccdc34os
chr2	110032762	110033182	Bbox1
chr2	112105452	112106612	Slc12a6
chr2	113479312	113480008	Fmn1
chr2	113529527	113530163	Fmn1
chr2	113530732	113531356	Fmn1
chr2	113727286	113727887	Arhgap11a
chr2	114496141	114496704	Dph6
chr2	115055358	115056558	4930528P14Rik
chr2	115144473	115145011	4930528P14Rik
chr2	115746018	115746561	Meis2
chr2	115817558	115818162	Meis2
chr2	116233040	116233575	2810405F15Rik
chr2	116544319	116544927	Tmco5
chr2	117004581	117005014	Mir674
chr2	117358433	117359001	Rasgrp1
chr2	117557025	117558237	Gm13985
chr2	117725895	117726877	4930412B13Rik
chr2	117727009	117727597	4930412B13Rik
chr2	117938629	117939332	Thbs1
chr2	117952969	117954295	Thbs1
chr2	119962189	119962654	Ehd4
chr2	120343976	120344744	Capn3
chr2	121837155	121837949	Eif3j1
chr2	124797141	124797986	Slc24a5
chr2	126148798	126149788	Atp8b4
chr2	128926482	128926952	Polr1b
chr2	130863264	130864260	Mir6973b
chr2	131504298	131504844	Adra1d
chr2	133534610	133535190	Mir3090
chr2	134781427	134781995	Plcb1
chr2	135149580	135150369	4930545L23Rik
chr2	135185840	135186649	4930545L23Rik
chr2	135739822	135740502	Lamp5
chr2	136496284	136496852	Snap25
chr2	139293439	139293945	Sptlc3
chr2	140998964	140999723	Flrt3
chr2	141134122	141134835	Flrt3
chr2	141241746	141243113	Flrt3
chr2	141546646	141547150	Flrt3
chr2	141641035	141642548	Kif16b
chr2	142849081	142849524	Snrpb2
chr2	143507188	143507967	Pcsk2os2
chr2	143637901	143638279	Pcsk2os2
chr2	145562865	145563397	BC039771
chr2	146155281	146156039	A930019D19Rik
chr2	147525052	147525676	A530006G24Rik
chr2	148519696	148520580	Gzf1
chr2	152224104	152225135	Sox12
chr2	152706800	152707309	Mir5622
chr2	153457808	153458613	Commd7
chr2	154438849	154439994	Zfp341
chr2	157273964	157274546	Src
chr2	157282739	157283981	Src
chr2	157300823	157301540	Src
chr2	157617420	157617993	Ctnnbl1
chr2	157918196	157918982	2010009K17Rik
chr2	159882606	159883224	9130015L21Rik
chr2	160685183	160685627	Zhx3
chr2	160827400	160827964	Emilin3
chr2	160983074	160983546	Chd6
chr2	161207992	161208760	Chd6
chr2	162737526	162738163	Srsf6
chr2	163820607	163821287	Ywhab
chr2	165425818	165427167	Eya2
chr2	166091889	166092755	Gm11468
chr2	166130951	166131601	Gm11468
chr2	166248680	166249690	5031425F14Rik
chr2	166251516	166252151	5031425F14Rik
chr2	166252427	166252949	5031425F14Rik
chr2	166383567	166384267	5031425F14Rik
chr2	166901926	166903115	Snord12
chr2	166904967	166905390	Snord12
chr2	167384783	167385567	Snai1
chr2	167600106	167600528	A530013C23Rik
chr2	167675286	167675927	Ptpn1
chr2	168443521	168443929	Nfatc2
chr2	170046355	170046988	Zfp217
chr2	170666317	170667568	Dok5
chr2	173942253	173942870	Npepl1
chr3	5236270	5237097	2700069I18Rik
chr3	5350984	5351852	2700069I18Rik
chr3	5860609	5860759	Pex2
chr3	8036467	8037187	1700010I02Rik
chr3	8142107	8142872	1700010I02Rik
chr3	8510605	8511282	Stmn2
chr3	14795484	14796029	Car1
chr3	15053882	15054534	A930001A20Rik
chr3	15223203	15223964	Gm9733
chr3	18909659	18910039	Armc1
chr3	19853817	19854229	Cp
chr3	19856878	19857572	Cp
chr3	19859961	19861035	Cp
chr3	20560810	20561227	Agtr1b
chr3	20805551	20806376	Agtr1b
chr3	21717665	21718573	Tbl1xr1
chr3	21726529	21726901	Tbl1xr1
chr3	21989809	21990344	Tbl1xr1
chr3	25044717	25045558	Nlgn1
chr3	27576371	27577250	Fndc3b
chr3	27762186	27763173	Tmem212
chr3	28221373	28221991	Tnik
chr3	31058825	31059369	Cldn11
chr3	32260012	32260586	4930429B21Rik
chr3	32392220	32392807	Kcnmb3
chr3	36348055	36349028	Mir7009
chr3	37571587	37571919	Spry1
chr3	37632737	37633350	Gm5148
chr3	37636405	37636879	Gm5148
chr3	37744095	37744866	Gm20755
chr3	37805673	37806339	Gm20755
chr3	38249815	38250309	Ankrd50
chr3	38400286	38400747	Ankrd50
chr3	38517297	38517833	Ankrd50
chr3	40017592	40018905	1700017G19Rik
chr3	40486381	40486998	Slc25a31
chr3	41746927	41747490	D3Ertd751e
chr3	45327832	45328677	1700027H10Rik
chr3	46870110	46870866	Mir6379
chr3	49714353	49715316	Pcdh18
chr3	49732480	49733237	Pcdh18
chr3	50142170	50143133	Slc7a11
chr3	50959408	50960277	Noct
chr3	51864558	51865168	Maml3
chr3	52224909	52225311	Foxo1
chr3	52407458	52407996	Gm2447
chr3	52663852	52664778	Gm20750
chr3	53031841	53032446	Lhfp
chr3	53100669	53101398	Nhlrc3
chr3	54559084	54559981	Smad9
chr3	54560012	54560650	Smad9
chr3	54917925	54918429	Spg20
chr3	55299684	55300102	Dclk1
chr3	57969208	57970897	1700007F19Rik
chr3	58049248	58049631	1700007F19Rik
chr3	60305081	60305449	Mbnl1
chr3	60331759	60332637	Mbnl1
chr3	60806943	60807678	P2ry1
chr3	63343581	63343950	Mme
chr3	65169138	65169647	A730090N16Rik
chr3	65245428	65245946	Ssr3
chr3	65338090	65338860	4931440P22Rik
chr3	65665107	65665706	Ccnl1
chr3	66169559	66170061	Veph1
chr3	68369792	68370371	Schip1
chr3	68400839	68401919	Schip1
chr3	69557791	69558857	Nmd3
chr3	79778989	79779574	Fam198b
chr3	80111531	80112260	Fam198b
chr3	81714373	81715051	Ctso
chr3	82180682	82181193	Map9
chr3	83704375	83705292	Tlr2
chr3	83999758	84000486	Trim2
chr3	86893701	86894472	Kirrel
chr3	86979442	86979822	Kirrel
chr3	88291988	88293339	Lmna
chr3	88894695	88895480	Rusc1
chr3	89200394	89200887	Gm15417
chr3	89311768	89312459	Kcnn3
chr3	91893350	91894140	Lor
chr3	94642062	94642531	Pogz
chr3	95782116	95782800	Gm9054
chr3	96012927	96013715	Hist2h2ab
chr3	96024059	96024438	Hist2h2ab
chr3	96384069	96384451	Gm15441
chr3	97838430	97839054	Notch2
chr3	98159545	98160440	Phgdh
chr3	99057583	99059383	Tbx15
chr3	99070491	99071379	Tbx15
chr3	99071588	99072274	Tbx15
chr3	99456351	99457046	Spag17
chr3	99658173	99659345	Spag17
chr3	99667848	99668300	Spag17
chr3	99691593	99691923	Spag17
chr3	100873823	100874426	Ptgfrn
chr3	101226869	101227767	Igsf3
chr3	102474886	102475330	Tspan2
chr3	102861954	102862559	Nras
chr3	104102595	104103308	Magi3
chr3	107816063	107816788	Gstm1
chr3	107950606	107951376	Gnai3
chr3	109202802	109203825	Vav3
chr3	114785917	114786385	Olfm3
chr3	115828756	115830563	Vcam1
chr3	116510949	116511429	Agl
chr3	117317809	117318538	Plppr5
chr3	121046971	121047464	Alg14
chr3	121092482	121093486	Cnn3
chr3	121627625	121628663	Arhgap29
chr3	121790976	121791577	Abca4
chr3	122067463	122067892	Bcar3
chr3	122105665	122106312	Bcar3
chr3	122503349	122504127	4930447N08Rik
chr3	122803374	122804303	Myoz2
chr3	122843262	122843809	Synpo2
chr3	125419786	125420259	Ugt8a
chr3	125466865	125467509	Ugt8a
chr3	125483241	125483970	Ugt8a
chr3	126302654	126303366	Camk2d
chr3	126425855	126426751	Camk2d
chr3	126504327	126504722	Ank2
chr3	126669029	126669695	Ank2
chr3	127195916	127196594	Mir302b
chr3	127544760	127545526	Ap1ar
chr3	128072264	128072756	D030025E07Rik
chr3	128310236	128311271	D030025E07Rik
chr3	128495616	128497046	Pitx2
chr3	128584653	128585229	Pitx2
chr3	128585895	128586391	Pitx2
chr3	128916220	128917191	Pitx2
chr3	128971916	128972542	Pitx2
chr3	129850753	129851336	Col25a1
chr3	130623723	130624346	Lef1
chr3	131546648	131547415	Dkk2
chr3	131556017	131556598	Dkk2
chr3	133658348	133658858	Cxxc4
chr3	134379218	134379911	Tacr3
chr3	135336675	135337353	Nfkb1
chr3	135749353	135750087	Bank1
chr3	140475545	140476282	Pdha2
chr3	140803622	140804247	Pdha2
chr3	143577281	143578046	Gm6260
chr3	144202102	144202532	Hs2st1
chr3	144240596	144241132	Sep15
chr3	144248066	144248898	Sep15
chr3	146320197	146320844	4930503B20Rik
chr3	147630755	147631694	Adgrl2
chr3	149107797	149108568	Gm1653
chr3	149158832	149159352	Gm1653
chr3	149854845	149855448	Mir3963
chr3	150290004	150290615	Mir3963
chr3	151479821	151480478	Ptgfr
chr3	151759164	151759698	Gipc2
chr3	152146320	152147085	Zzz3
chr3	153247756	153248293	St6galnac3
chr3	153873374	153873917	Lhx8
chr3	154113877	154114628	AI606473
chr3	155012027	155012453	Lrriq3
chr3	156223793	156224196	4930570G19Rik
chr3	157961607	157962008	Lrrc40
chr4	4561611	4562372	Gm11780
chr4	6441814	6442451	Nsmaf
chr4	8462485	8463523	Rab2a
chr4	8777526	8778268	Chd7
chr4	8951796	8952377	Clvs1
chr4	8985439	8986461	Clvs1
chr4	9484331	9485263	Asph
chr4	10254188	10254723	4930448K20Rik
chr4	10279164	10279600	4930448K20Rik
chr4	10329891	10330866	1700123O12Rik
chr4	10340416	10341043	1700123O12Rik
chr4	11506242	11506856	Fsbp
chr4	13539467	13540064	Runx1t1
chr4	13646406	13647547	Runx1t1
chr4	14449633	14450200	Slc26a7
chr4	14458778	14459954	Slc26a7
chr4	14917234	14918292	Gm11837
chr4	15872008	15872633	Decr1
chr4	24926766	24927108	Gpr63
chr4	30549171	30549695	4930556G01Rik
chr4	31184619	31185254	4930556G01Rik
chr4	32445815	32446609	Bach2
chr4	32971577	32972093	Ankrd6
chr4	34173651	34174191	Spaca1
chr4	34790648	34791519	Zfp292
chr4	34864619	34865328	Platr9
chr4	35349369	35350428	3110043O21Rik
chr4	41447256	41448069	AI464131
chr4	43411659	43412760	Rusc2
chr4	43991257	43992517	Ccin
chr4	45150675	45151288	Tomm5
chr4	45155023	45155820	Tomm5
chr4	46320451	46321218	Foxe1
chr4	46501884	46502442	Nans
chr4	48673692	48674207	Murc
chr4	48767539	48768177	Murc
chr4	48768292	48769652	Murc
chr4	49075460	49075890	Plppr1
chr4	52223830	52224524	C630028M04Rik
chr4	53024609	53025025	Nipsnap3b
chr4	53452758	53453100	Slc44a1
chr4	53803451	53803916	Tal2
chr4	55101533	55102479	Zfp462
chr4	56624686	56625179	Actl7b
chr4	56697855	56698447	Actl7b
chr4	58676199	58676956	Lpar1
chr4	59348632	59349232	Gm12596
chr4	59401093	59401675	Susd1
chr4	59768204	59768766	Inip
chr4	75032156	75032681	Tmem261
chr4	81576791	81577469	Gm5860
chr4	81950115	81950960	Nfib
chr4	82337616	82338615	Zdhhc21
chr4	82686635	82687283	Frem1
chr4	82697698	82698344	Frem1
chr4	83818356	83819459	6030471H07Rik
chr4	86036868	86037296	Saxo1
chr4	87109088	87109522	Slc24a2
chr4	87293474	87294676	Mllt3
chr4	87369213	87369883	Mllt3
chr4	87385420	87385810	Mllt3
chr4	87386543	87387711	Mllt3
chr4	90930183	90930852	Elavl2
chr4	93461191	93461773	Tusc1
chr4	94419112	94419804	Tek
chr4	96415956	96416591	Gm12695
chr4	96823069	96824134	Gm12695
chr4	97249262	97250132	Nfia
chr4	97417654	97418250	Nfia
chr4	97438511	97439444	Nfia
chr4	97503472	97504035	Nfia
chr4	97993144	97993844	Tm2d1
chr4	98484015	98484504	Kank4
chr4	98754444	98755262	Dock7
chr4	100024504	100024931	Ube2u
chr4	100356344	100356804	Cachd1
chr4	102105059	102105948	Pde4b
chr4	102183352	102184876	Pde4b
chr4	102513578	102513993	Sgip1
chr4	106511478	106511860	Acot11
chr4	108856284	108856710	Osbpl9
chr4	109650111	109650594	Dmrta2
chr4	115410201	115410700	Efcab14
chr4	116299765	116300200	Nasp
chr4	117084137	117084690	Rnf220
chr4	117100090	117100642	Rnf220
chr4	117248453	117249983	Eri3
chr4	123581879	123582529	Mycbp
chr4	124888847	124889636	Zc3h12a
chr4	125724119	125724704	Mrps15
chr4	126383260	126385161	Tfap2e
chr4	133085946	133086499	Kdf1
chr4	133293042	133293365	Arid1a
chr4	133484631	133485267	Hmgn2
chr4	133951743	133952671	Pafah2
chr4	135609117	135609623	Rpl11
chr4	137649316	137650642	1700095J12Rik
chr4	137982661	137983120	Mul1
chr4	138774255	138774844	Capzb
chr4	139304801	139305242	Pax7
chr4	139340171	139340649	Pax7
chr4	139347253	139347811	Pax7
chr4	140865856	140866449	Epha2
chr4	140885681	140886650	Epha2
chr4	144578193	144579175	Dhrs3
chr4	144589196	144590379	Dhrs3
chr4	144600903	144601989	Dhrs3
chr4	144692149	144692689	Vps13d
chr4	148522090	148522566	Apitd1
chr4	148819239	148819915	Rbp7
chr4	150211431	150212334	1700045H11Rik
chr4	150978595	150979496	Camta1
chr4	150993472	150994460	Camta1
chr4	151384352	151385673	Klhl21
chr4	151559192	151560346	Acot7
chr4	151662341	151662965	Hes3
chr4	154469386	154469880	Morn1
chr4	154508010	154508995	Morn1
chr4	154548110	154549056	Ski
chr4	155084562	155085199	Ssu72
chr5	4484699	4485329	Fzd1
chr5	4959097	4959947	Fzd1
chr5	5510230	5510988	Cldn12
chr5	5683974	5684458	Steap2
chr5	8475428	8476387	Slc25a40
chr5	12586458	12587047	Sema3d
chr5	13384540	13385087	Sema3a
chr5	13950682	13951080	Sema3e
chr5	13974435	13975012	Sema3e
chr5	15465519	15466376	Cacna2d1
chr5	15480337	15481337	Cacna2d1
chr5	17999935	18000627	Gnai1
chr5	20187042	20188435	Phtf2
chr5	20452685	20453168	A630072M18Rik
chr5	21049113	21050041	Lrrc17
chr5	22924883	22925758	5031425E22Rik
chr5	24082911	24083894	Abcf2
chr5	24690359	24691026	Galntl5
chr5	31223745	31224469	Khk
chr5	31593337	31594001	Ift172
chr5	31828924	31829710	Slc4a1ap
chr5	36544184	36544900	Psapl1
chr5	37445912	37446383	Jakmip1
chr5	38776365	38777187	4930487D11Rik
chr5	46060379	46061234	1600023N17Rik
chr5	47853850	47854390	Slit2
chr5	48797219	48797672	5730480H06Rik
chr5	48913233	48913955	Kcnip4
chr5	50519944	50520707	4930448I18Rik
chr5	51807556	51808118	Ppargc1a
chr5	51862766	51863373	Ppargc1a
chr5	53493324	53494428	Slc34a2
chr5	54192367	54192945	Tbc1d19
chr5	58194450	58195125	Pcdh7
chr5	64447482	64447889	5830416I19Rik
chr5	64632827	64633527	Tbc1d1
chr5	65410799	65411922	Mir574
chr5	66778806	66779244	Apbb2
chr5	67384272	67384837	Limch1
chr5	73462426	73462840	Slc10a4
chr5	77730290	77730932	Noa1
chr5	81944415	81944845	Adgrl3
chr5	84710305	84710904	Epha5
chr5	86495429	86496400	Cenpc1
chr5	89951132	89951688	Npffr2
chr5	91261379	91262083	Cxcl15
chr5	91390179	91390725	Mthfd2l
chr5	91504644	91505285	Ereg
chr5	92033022	92034017	Parm1
chr5	92124898	92125274	1700063O14Rik
chr5	92151829	92152954	1700063O14Rik
chr5	92302644	92303524	Rchy1
chr5	92304487	92305888	Rchy1
chr5	92471214	92472311	Cdkl2
chr5	93450671	93451797	Sowahb
chr5	98307886	98308379	Antxr2
chr5	99195380	99196463	Bmp3
chr5	99620035	99620704	Rasgef1b
chr5	102324548	102324958	Cds1
chr5	102334556	102335202	Cds1
chr5	103287318	103287980	Arhgap24
chr5	104395141	104395984	Hsd17b13
chr5	106956255	106956745	Barhl2
chr5	107573126	107574127	Tgfbr3
chr5	110698340	110698908	Pgam5
chr5	111409534	111410080	Mir701
chr5	111629655	111630368	Pitpnb
chr5	111805468	111806249	Mn1
chr5	111822916	111823665	Mn1
chr5	112118457	112119002	E130006D01Rik
chr5	112252464	112253433	E130006D01Rik
chr5	112264630	112265723	E130006D01Rik
chr5	112386749	112387715	E130006D01Rik
chr5	114323462	114324321	Coro1c
chr5	116772587	116773296	B230112J18Rik
chr5	118974400	118974863	Med13l
chr5	119039097	119039985	Med13l
chr5	120601784	120602159	Gm10390
chr5	123599826	123600614	Setd1b
chr5	124617846	124619438	Pitpnm2
chr5	124990342	124990816	Tmed2
chr5	130234502	130235853	Gbas
chr5	130362782	130363717	Chchd2
chr5	132121386	132122022	4930563F08Rik
chr5	132278520	132278844	4930563F08Rik
chr5	132744319	132744714	Auts2
chr5	135662438	135663407	Baz1b
chr5	136646466	136647071	Orai2
chr5	136719908	136720808	Sh2b2
chr5	136808493	136809396	Mir721
chr5	136828945	136829492	Mir721
chr5	137070862	137071330	Cux1
chr5	137383878	137384356	Ift22
chr5	138526205	138526636	Zkscan1
chr5	138721408	138721823	Stag3
chr5	139470301	139471136	Pdgfa
chr5	140406015	140406705	Elfn1
chr5	140415350	140415840	Elfn1
chr5	140567273	140568029	Elfn1
chr5	141043923	141044678	Grifin
chr5	141055808	141056300	Grifin
chr5	142889923	142890494	Foxk1
chr5	143640984	143641510	Fbxl18
chr5	143814933	143815911	Rnf216
chr5	145445209	145445992	Tmem130
chr5	147604332	147605307	Usp12
chr5	149044941	149045720	Slc7a1
chr5	150020875	150021558	Uspl1
chr5	150027665	150028363	Uspl1
chr5	151010117	151011014	Fry
chr5	152196812	152197317	Gm3704
chr6	4366850	4367609	Col1a2
chr6	4381873	4382763	Col1a2
chr6	4511199	4511738	Casd1
chr6	4513092	4514293	Casd1
chr6	4531841	4532239	Casd1
chr6	4697881	4698976	Peg10
chr6	4712334	4712664	Peg10
chr6	4943690	4945027	Ppp1r9a
chr6	4955088	4956239	Ppp1r9a
chr6	5104290	5105120	Pon1
chr6	5392682	5393437	Pdk4
chr6	12286461	12287158	Gm6578
chr6	13551120	13551892	Tmem168
chr6	15142864	15143712	Foxp2
chr6	15153201	15153673	Foxp2
chr6	15692635	15693194	Mdfic
chr6	15700259	15701065	Mdfic
chr6	15739569	15740588	Mdfic
chr6	17466027	17467081	Met
chr6	17478727	17479617	Met
chr6	17821297	17822167	St7
chr6	21056963	21057296	Kcnd2
chr6	21352758	21353262	Kcnd2
chr6	21483509	21484995	Kcnd2
chr6	21517984	21518696	Tspan12
chr6	21610757	21611890	Tspan12
chr6	21807492	21808223	Tspan12
chr6	22229322	22230925	Wnt16
chr6	22305757	22306539	Fam3c
chr6	22775022	22776036	Ptprz1
chr6	23818308	23819053	Cadps2
chr6	24292016	24292772	Iqub
chr6	27623897	27624513	Mir592
chr6	28295141	28295586	Gcc1
chr6	30571044	30571582	Cpa5
chr6	30687356	30689165	Mest
chr6	30698534	30701553	Mir335
chr6	30701672	30702556	Mir335
chr6	32919049	32919550	Chchd3
chr6	33297160	33297884	Exoc4
chr6	33331839	33332535	Exoc4
chr6	34634725	34635542	Cald1
chr6	34675493	34676017	Cald1
chr6	34813977	34814495	Tmem140
chr6	36845312	36846146	Ptn
chr6	37202559	37203325	Dgki
chr6	37205944	37206774	Dgki
chr6	37312763	37313169	Dgki
chr6	37391758	37392898	Creb3l2
chr6	38073515	38074285	Atp6v0a4
chr6	38431779	38432681	Mir7670
chr6	42459241	42459857	Olfr456
chr6	42463310	42464091	Olfr455
chr6	42611563	42612148	Tcaf2
chr6	43262437	43264076	Nobox
chr6	43517079	43517847	Tpk1
chr6	43615367	43616739	Tpk1
chr6	47604923	47605287	Rn4.5s
chr6	47626550	47627019	Rn4.5s
chr6	47635200	47635600	Rn4.5s
chr6	47694063	47694450	Rn4.5s
chr6	47702751	47703361	Rn4.5s
chr6	47717557	47717871	Rn4.5s
chr6	48543298	48544518	Repin1
chr6	48763185	48763588	Tmem176b
chr6	53523000	53523515	Creb5
chr6	53684063	53684705	Tril
chr6	53913232	53913919	Cpvl
chr6	55153083	55153613	Fam188b
chr6	62113620	62114262	A730020E08Rik
chr6	67215920	67217464	Serbp1
chr6	70741833	70742795	Rpia
chr6	72058679	72059596	St3gal5
chr6	72085451	72086382	4933431G14Rik
chr6	72660812	72662240	Tcf7l1
chr6	72664661	72665355	Tcf7l1
chr6	72697113	72697858	Tcf7l1
chr6	77814530	77814976	Ctnna2
chr6	80569389	80570357	Lrrtm4
chr6	81421166	81421775	Mir7232
chr6	83028174	83028669	Pcgf1
chr6	83051278	83052333	Ccdc142
chr6	83081154	83082542	Rtkn
chr6	86231461	86232499	Fam136a
chr6	87083724	87084916	D6Ertd527e
chr6	88148805	88149942	Gata2
chr6	89311885	89312426	Plxna1
chr6	89545156	89545803	Chchd6
chr6	89830784	89831568	Vmn1r43
chr6	92777299	92777784	Adamts9
chr6	92893280	92893866	9530026P05Rik
chr6	93231655	93232153	9530026P05Rik
chr6	93457252	93458109	Magi1
chr6	97516773	97517154	Frmd4b
chr6	97988257	97989241	Mitf
chr6	98887859	98888966	Foxp1
chr6	98895344	98896021	Foxp1
chr6	98906084	98906962	Foxp1
chr6	99045265	99045956	Foxp1
chr6	99232911	99233657	Foxp1
[truncated: 460 more rows]
