# Supplementary material
Source: publisher figshare collection journal article supplement (https://plos.figshare.com/articles/dataset/_/4909007)

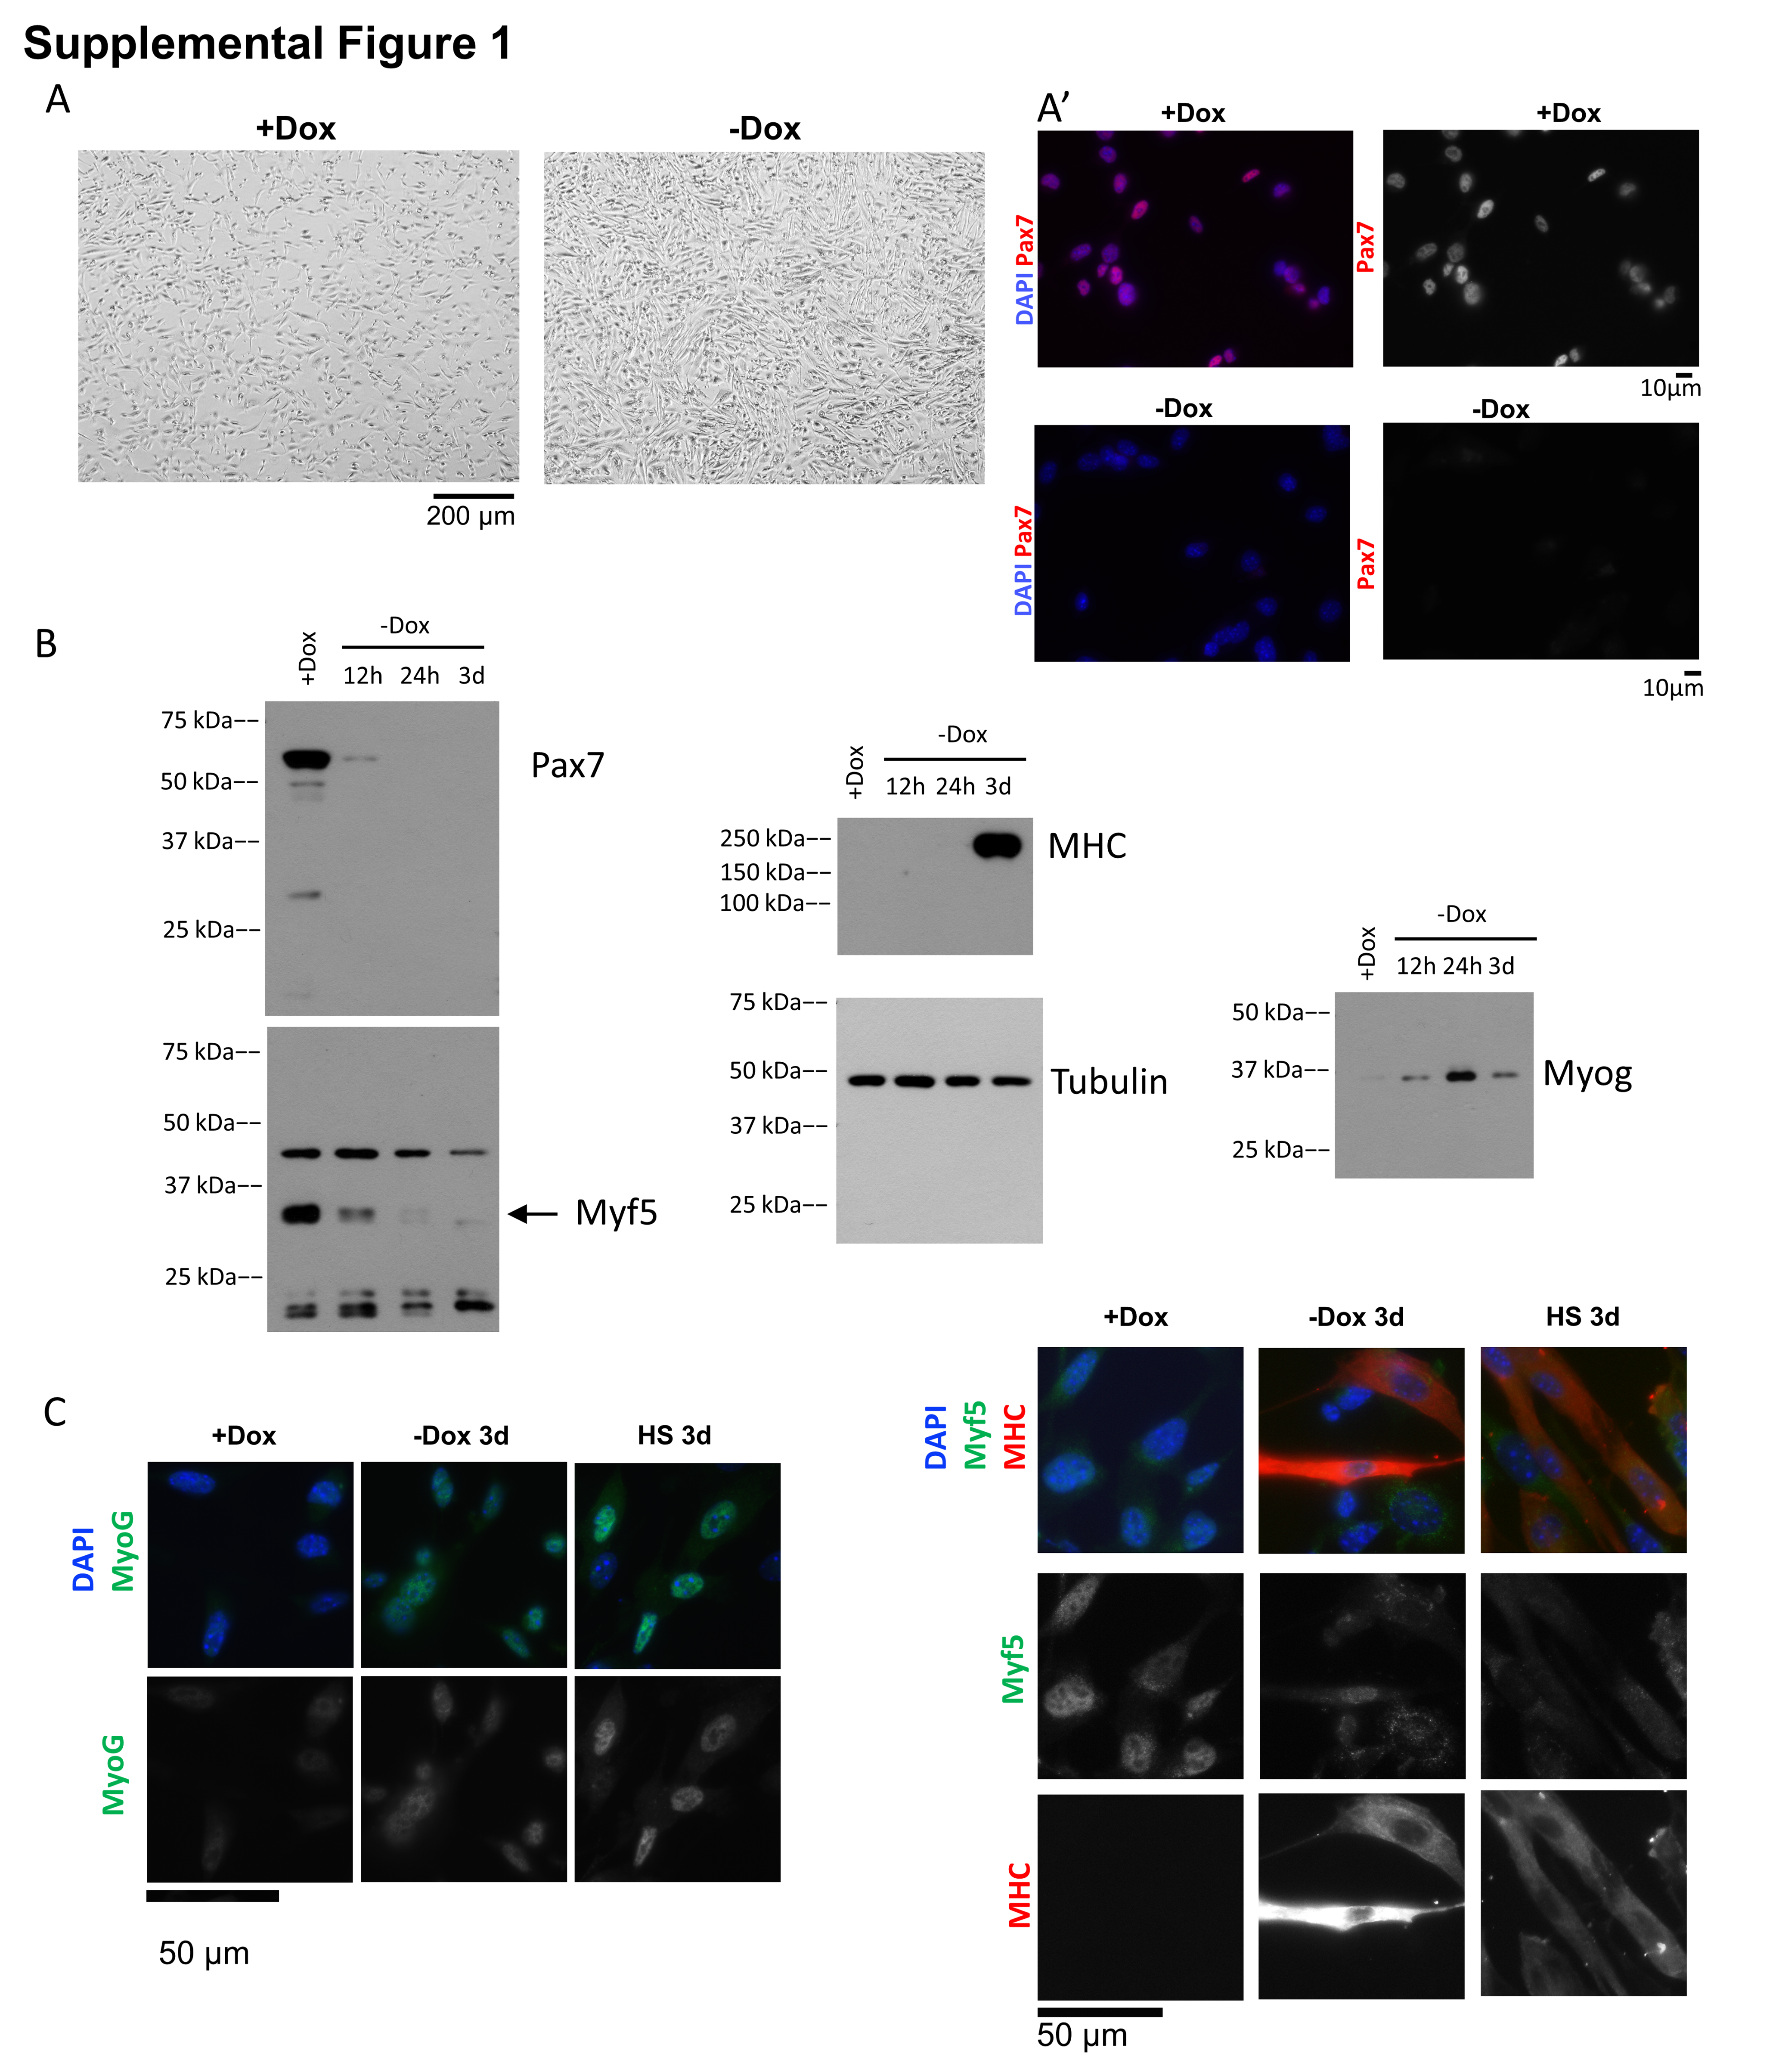

Supplement: Supplementary file 1 [file 1 › S1 Fig.tif]

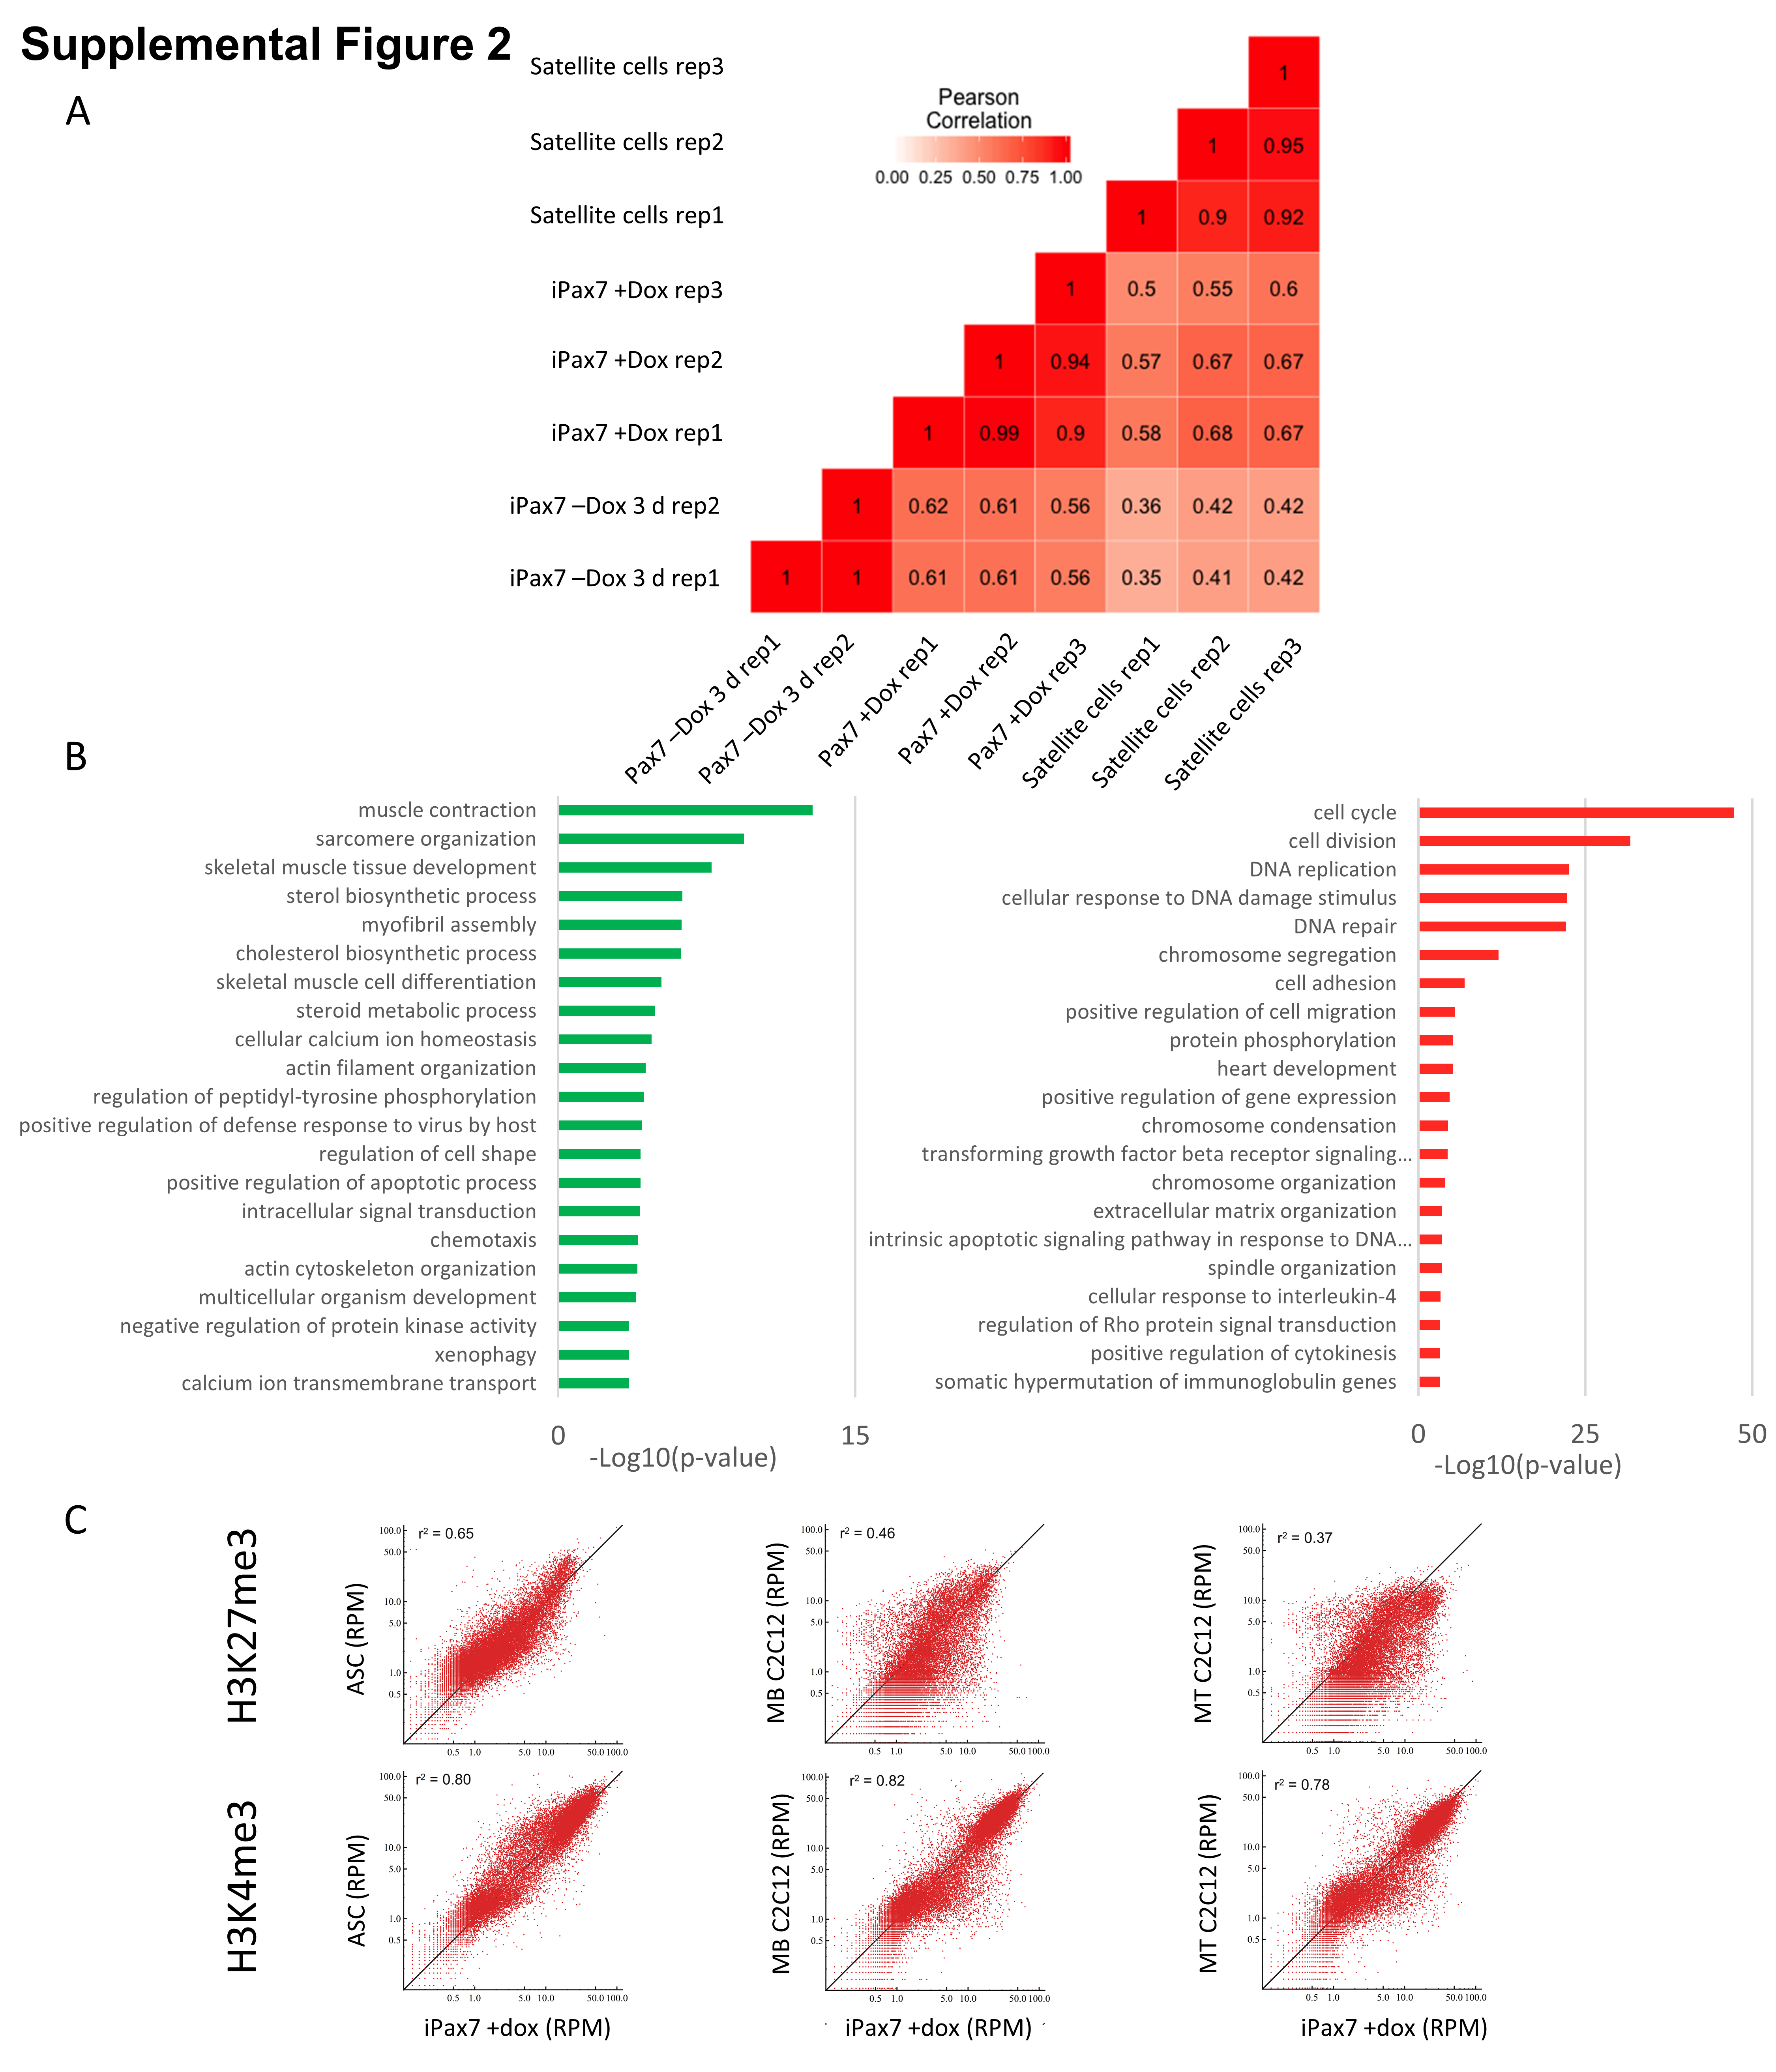

Supplement: Supplementary file 1 [file 1 › S2 Fig.TIF]

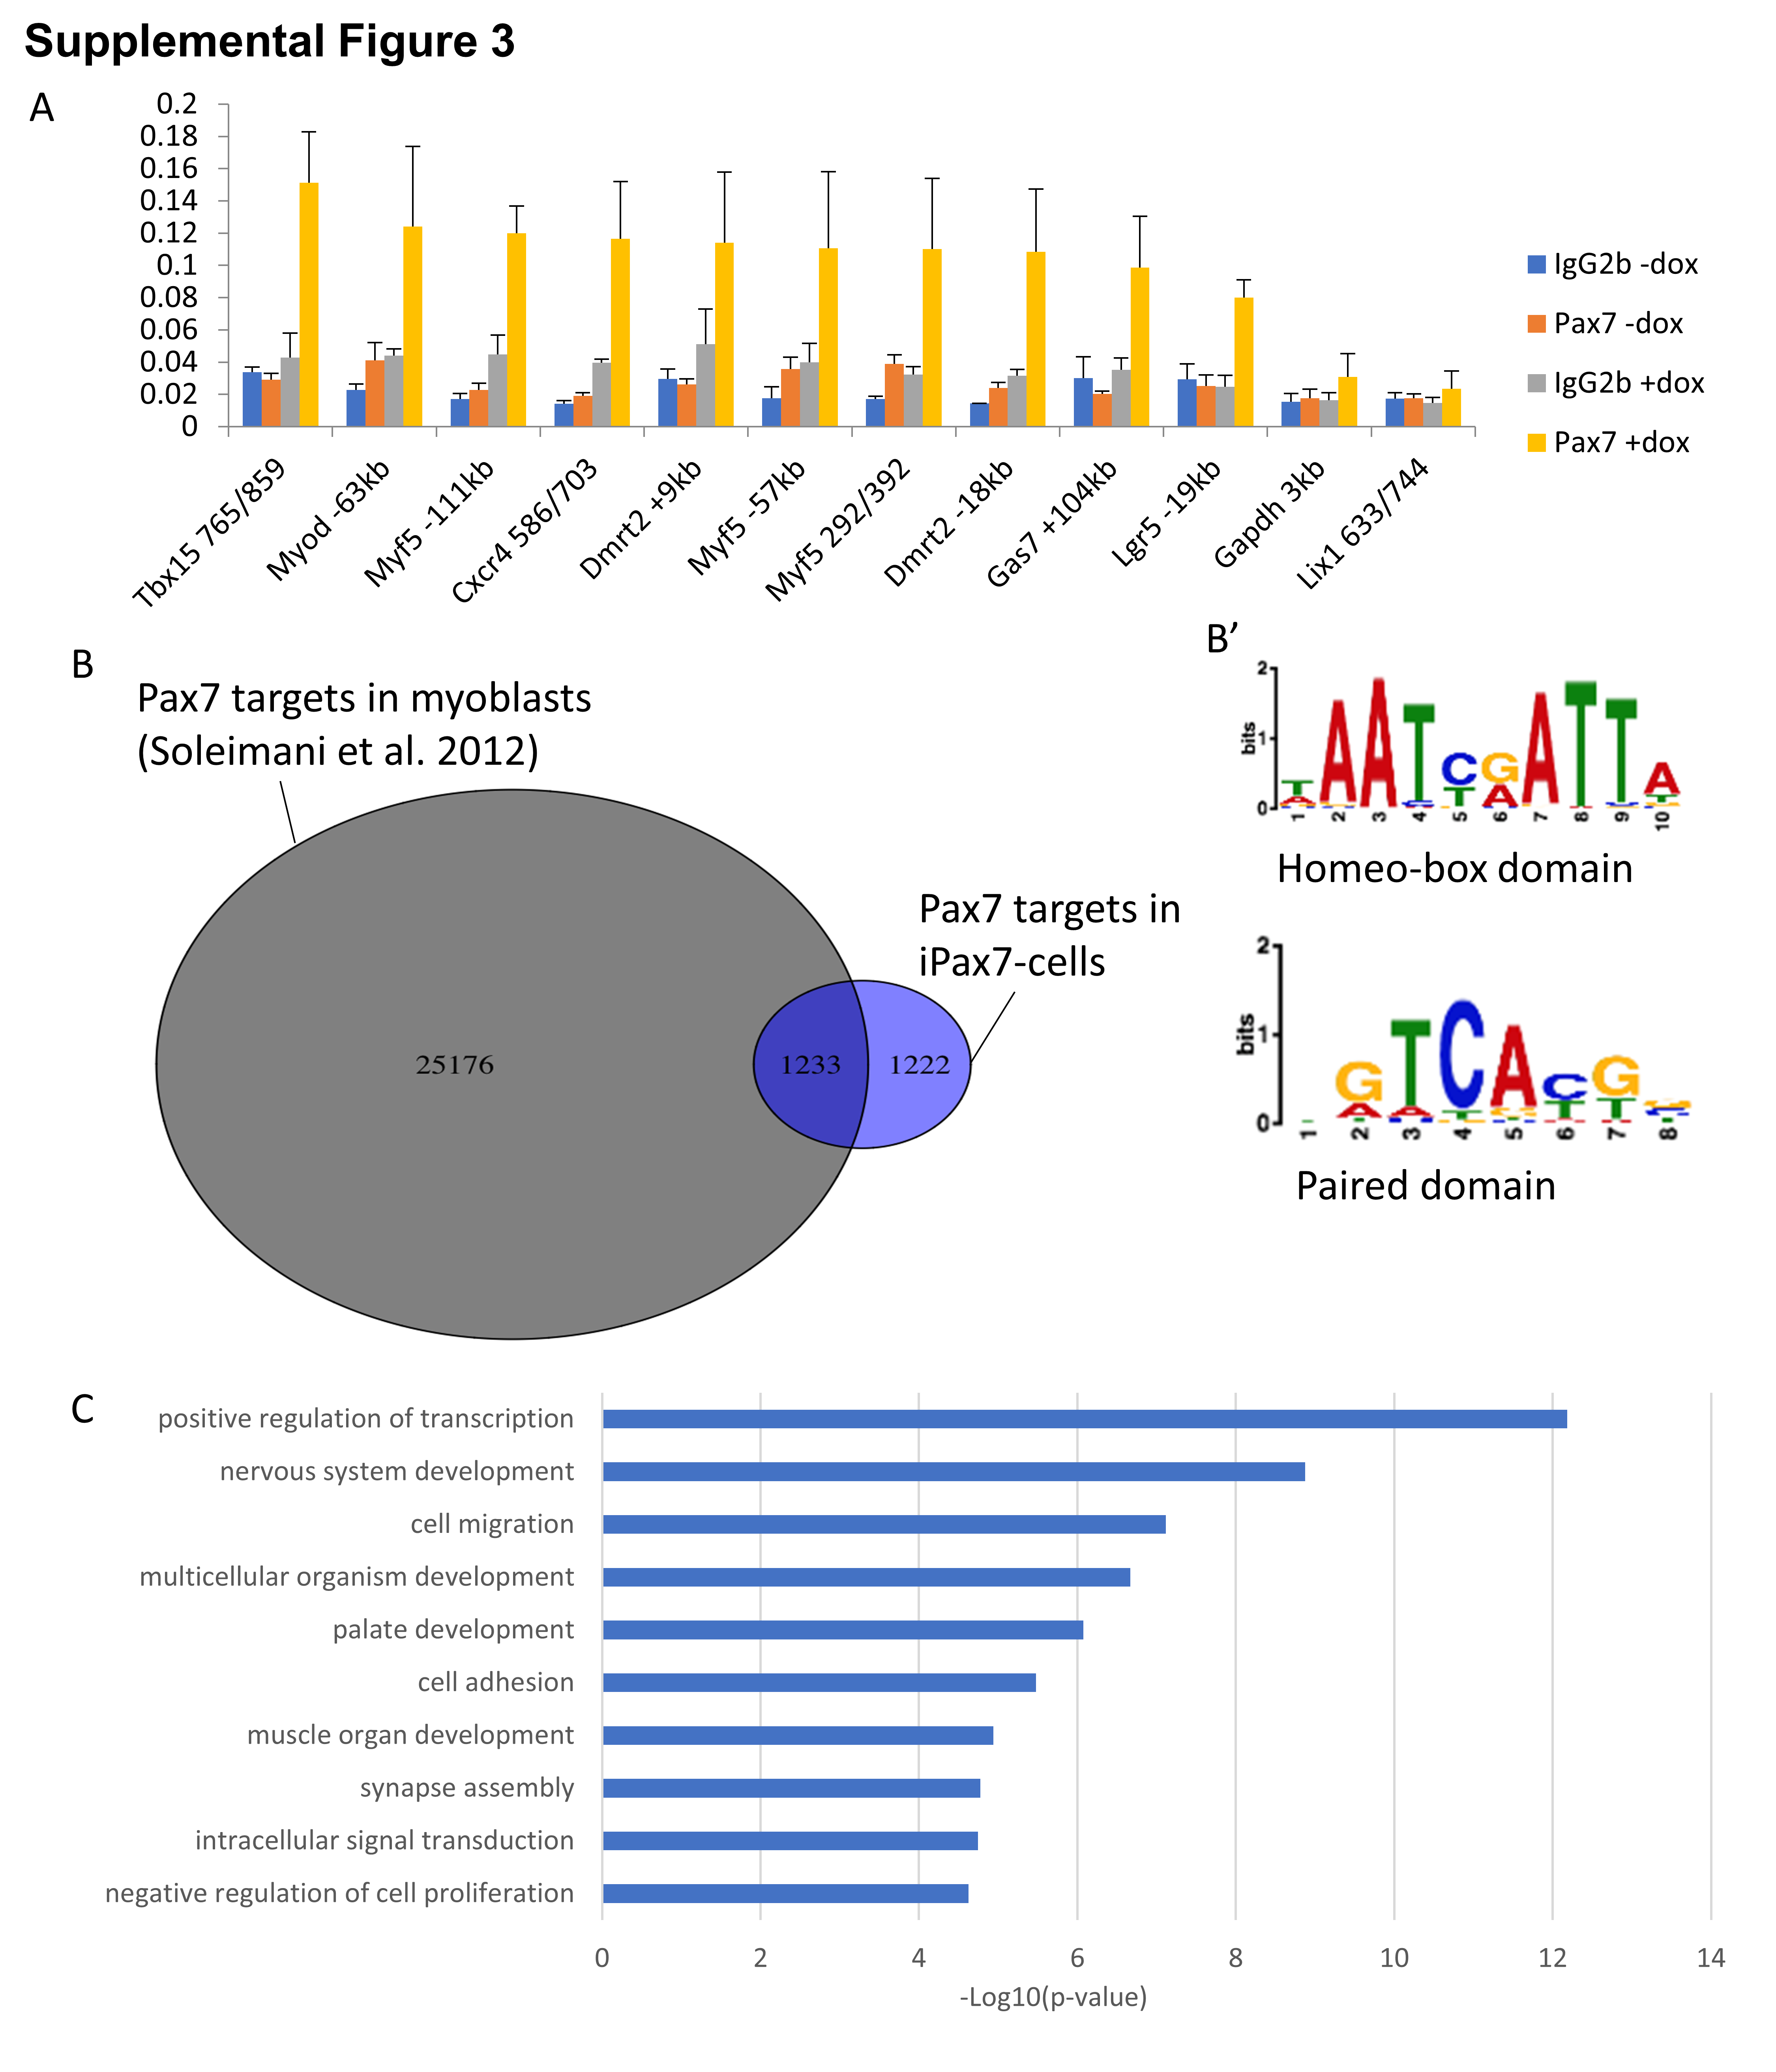

Supplement: Supplementary file 1 [file 1 › S3 Fig.TIF]

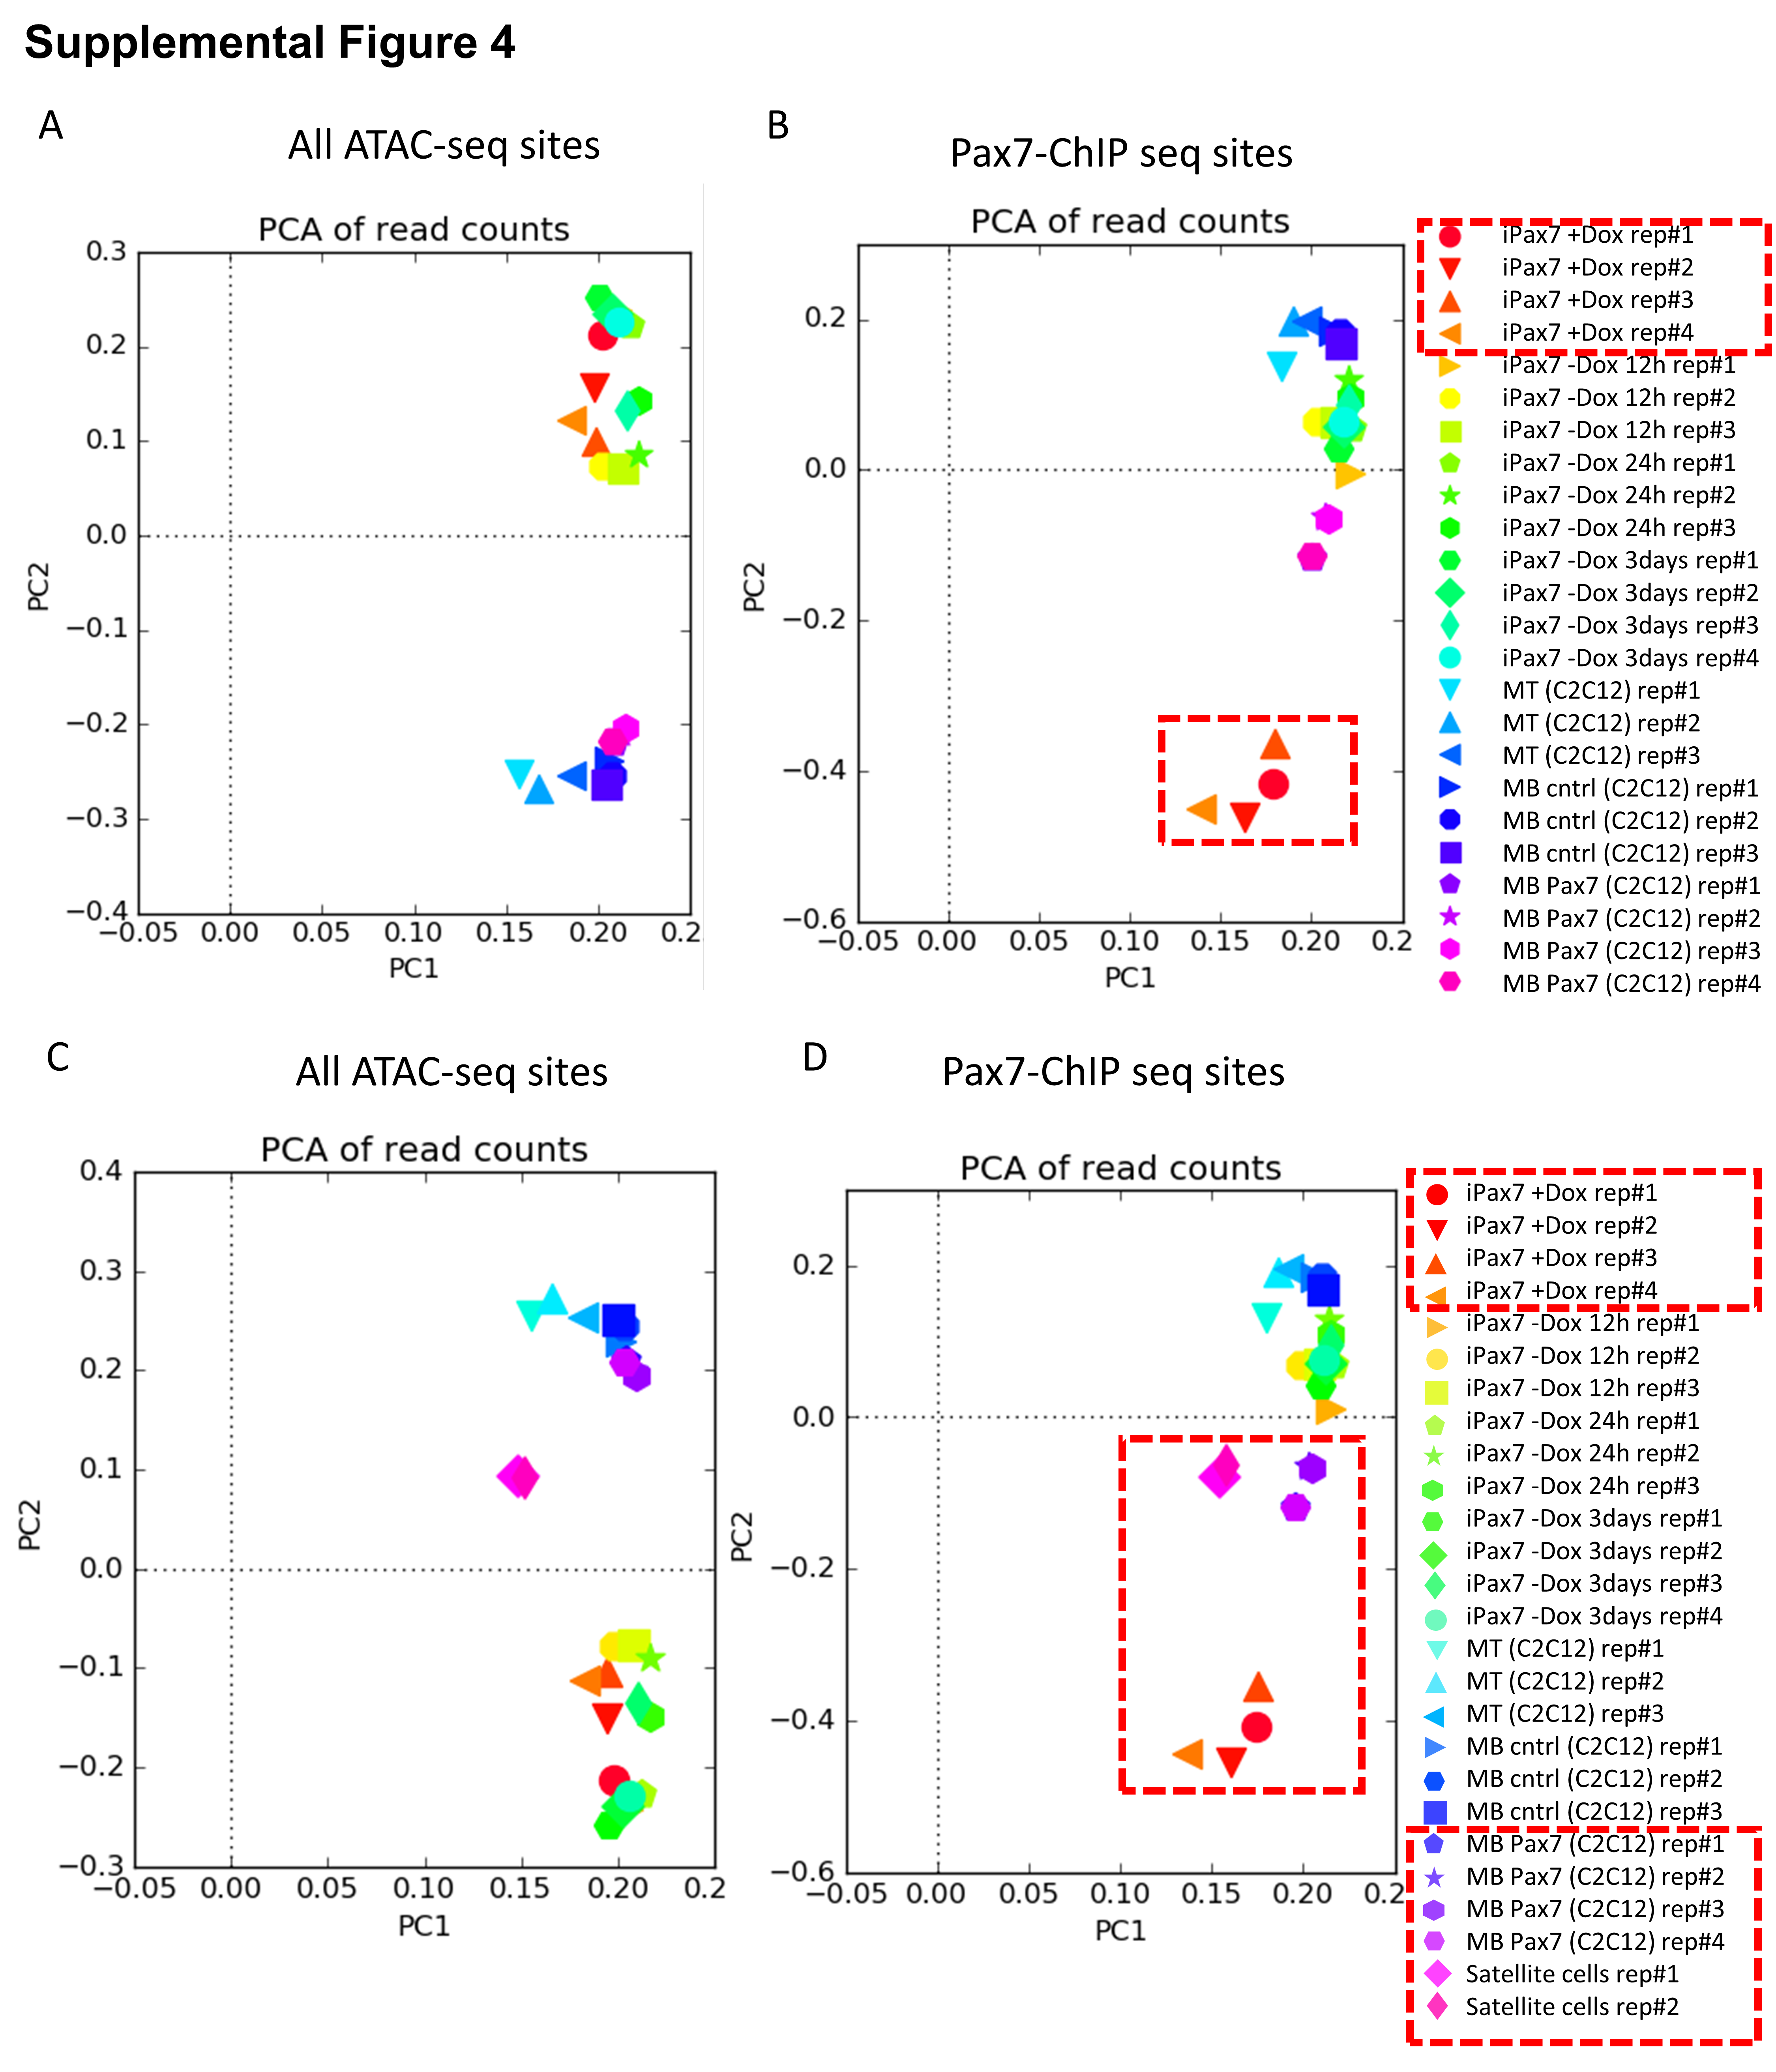

Supplement: Supplementary file 1 [file 1 › S4 Fig.TIF]

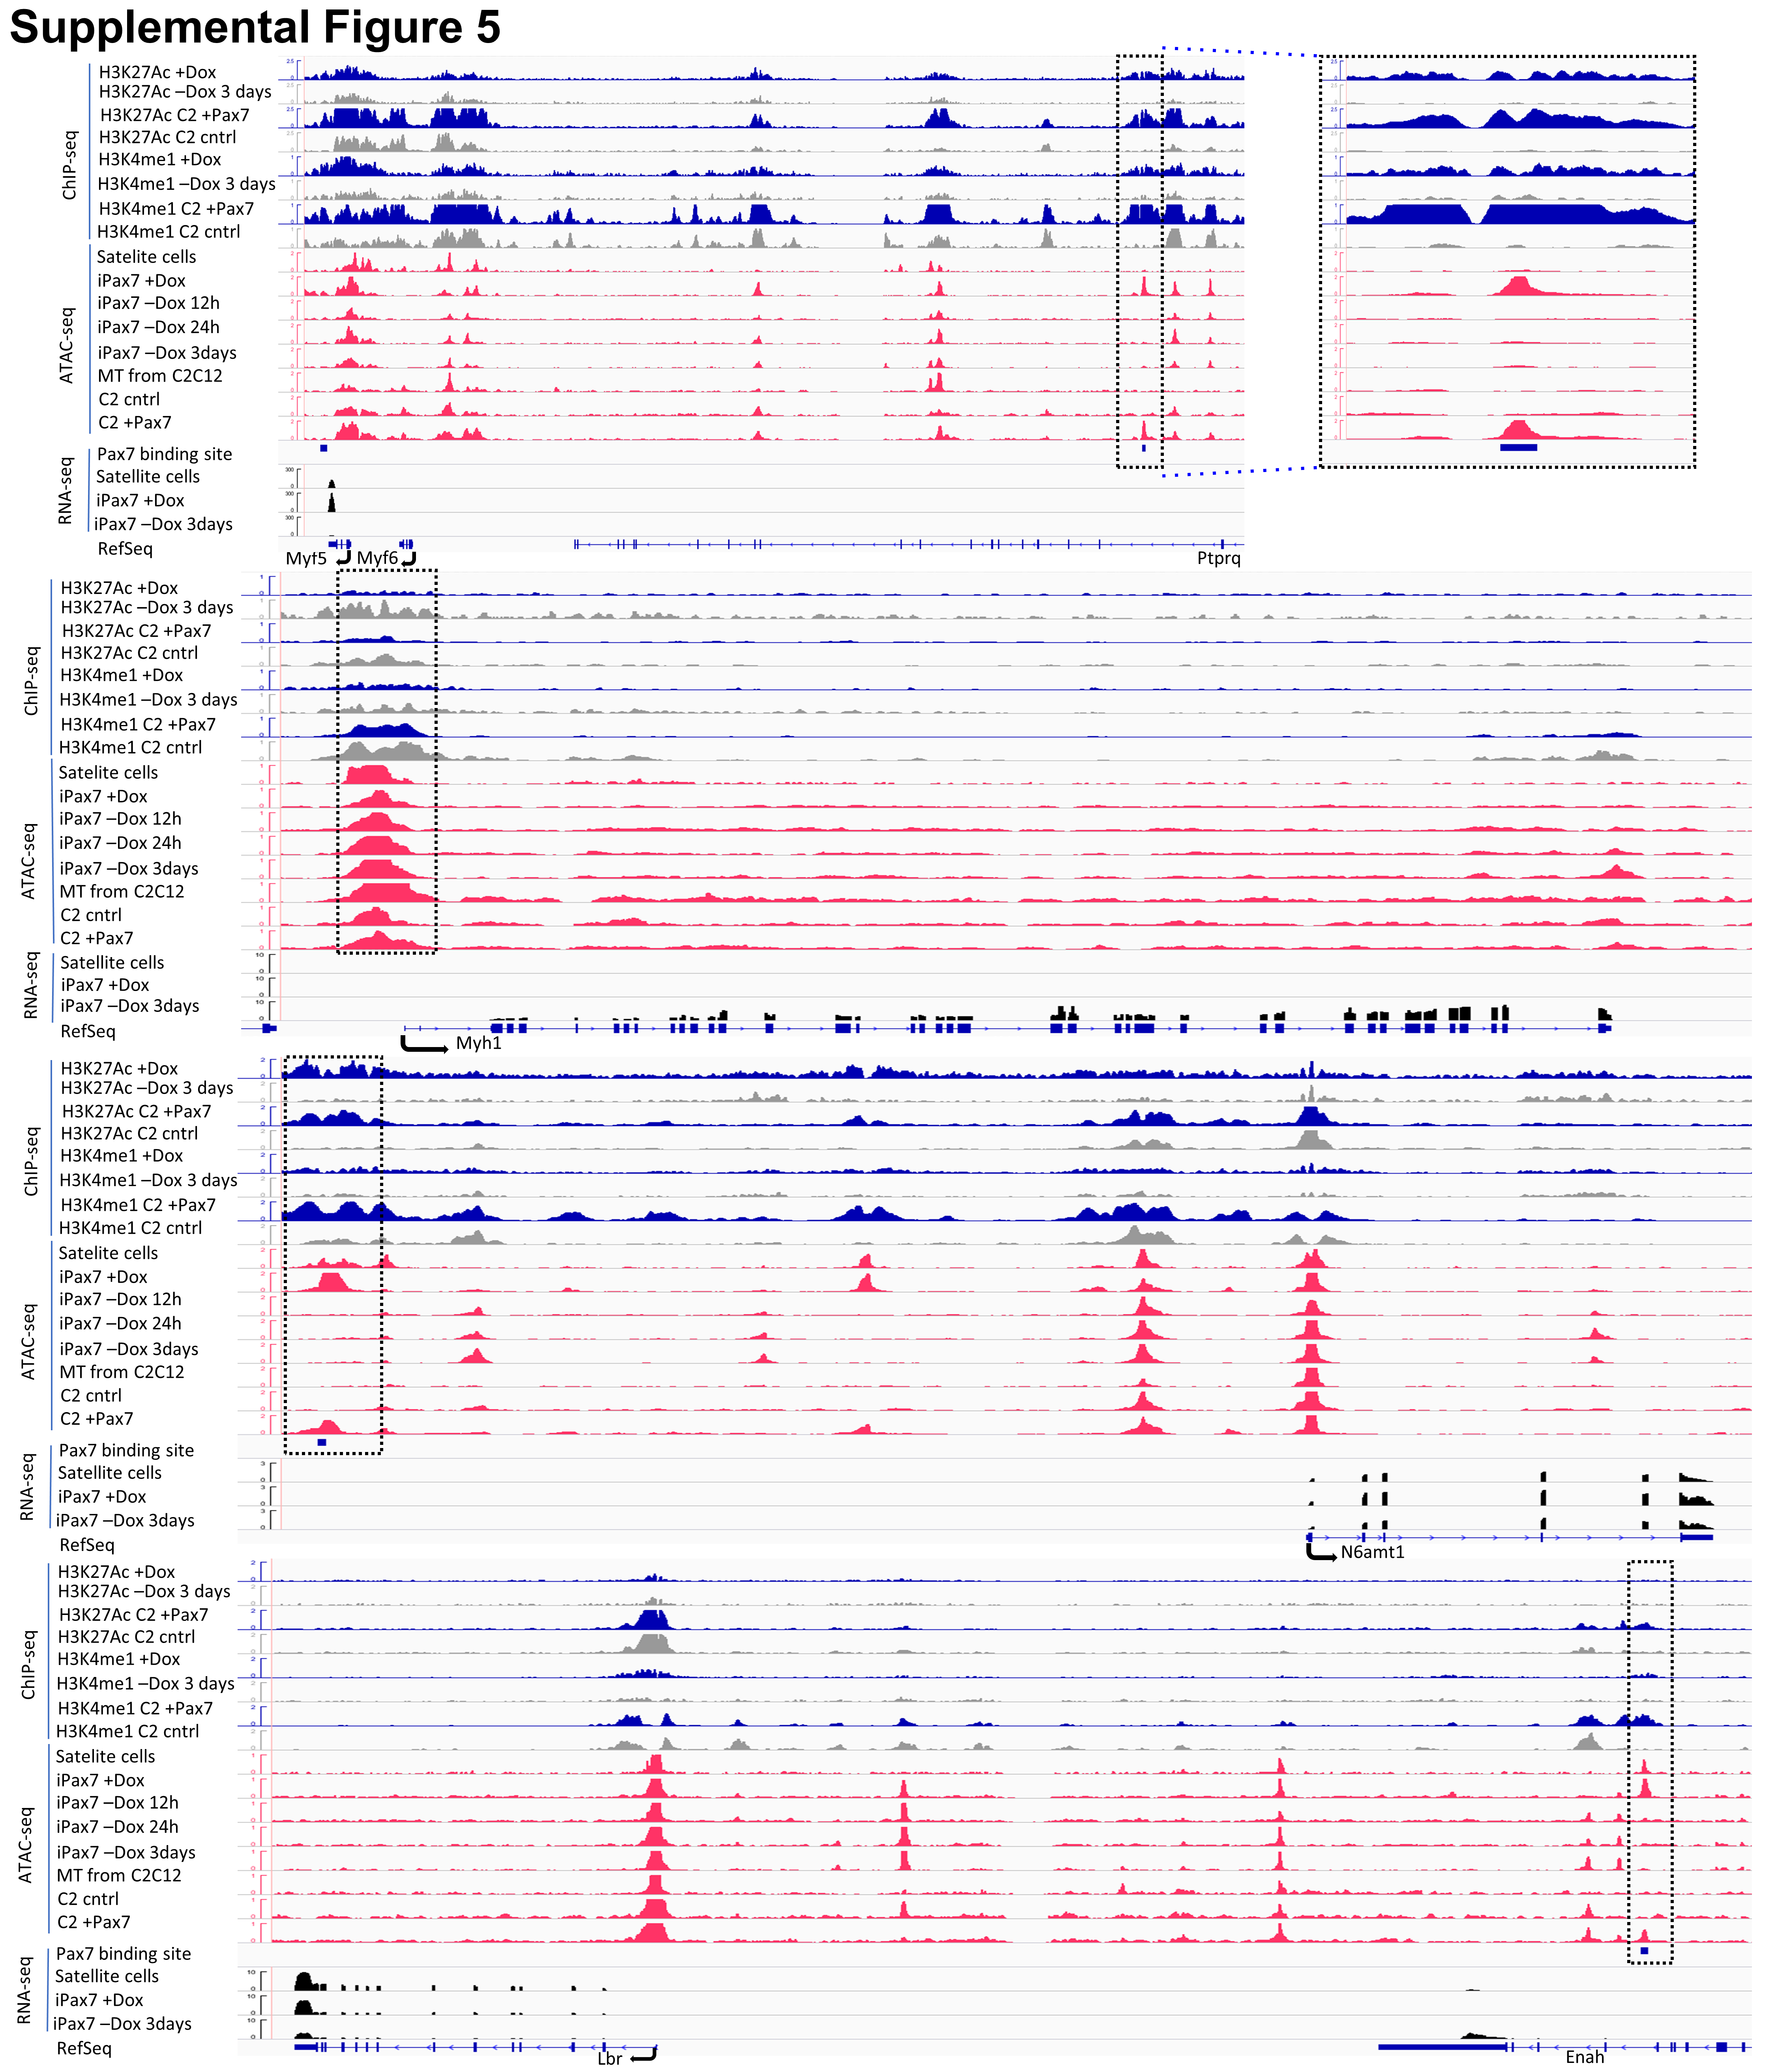

Supplement: Supplementary file 1 [file 1 › S5 Fig.TIF]

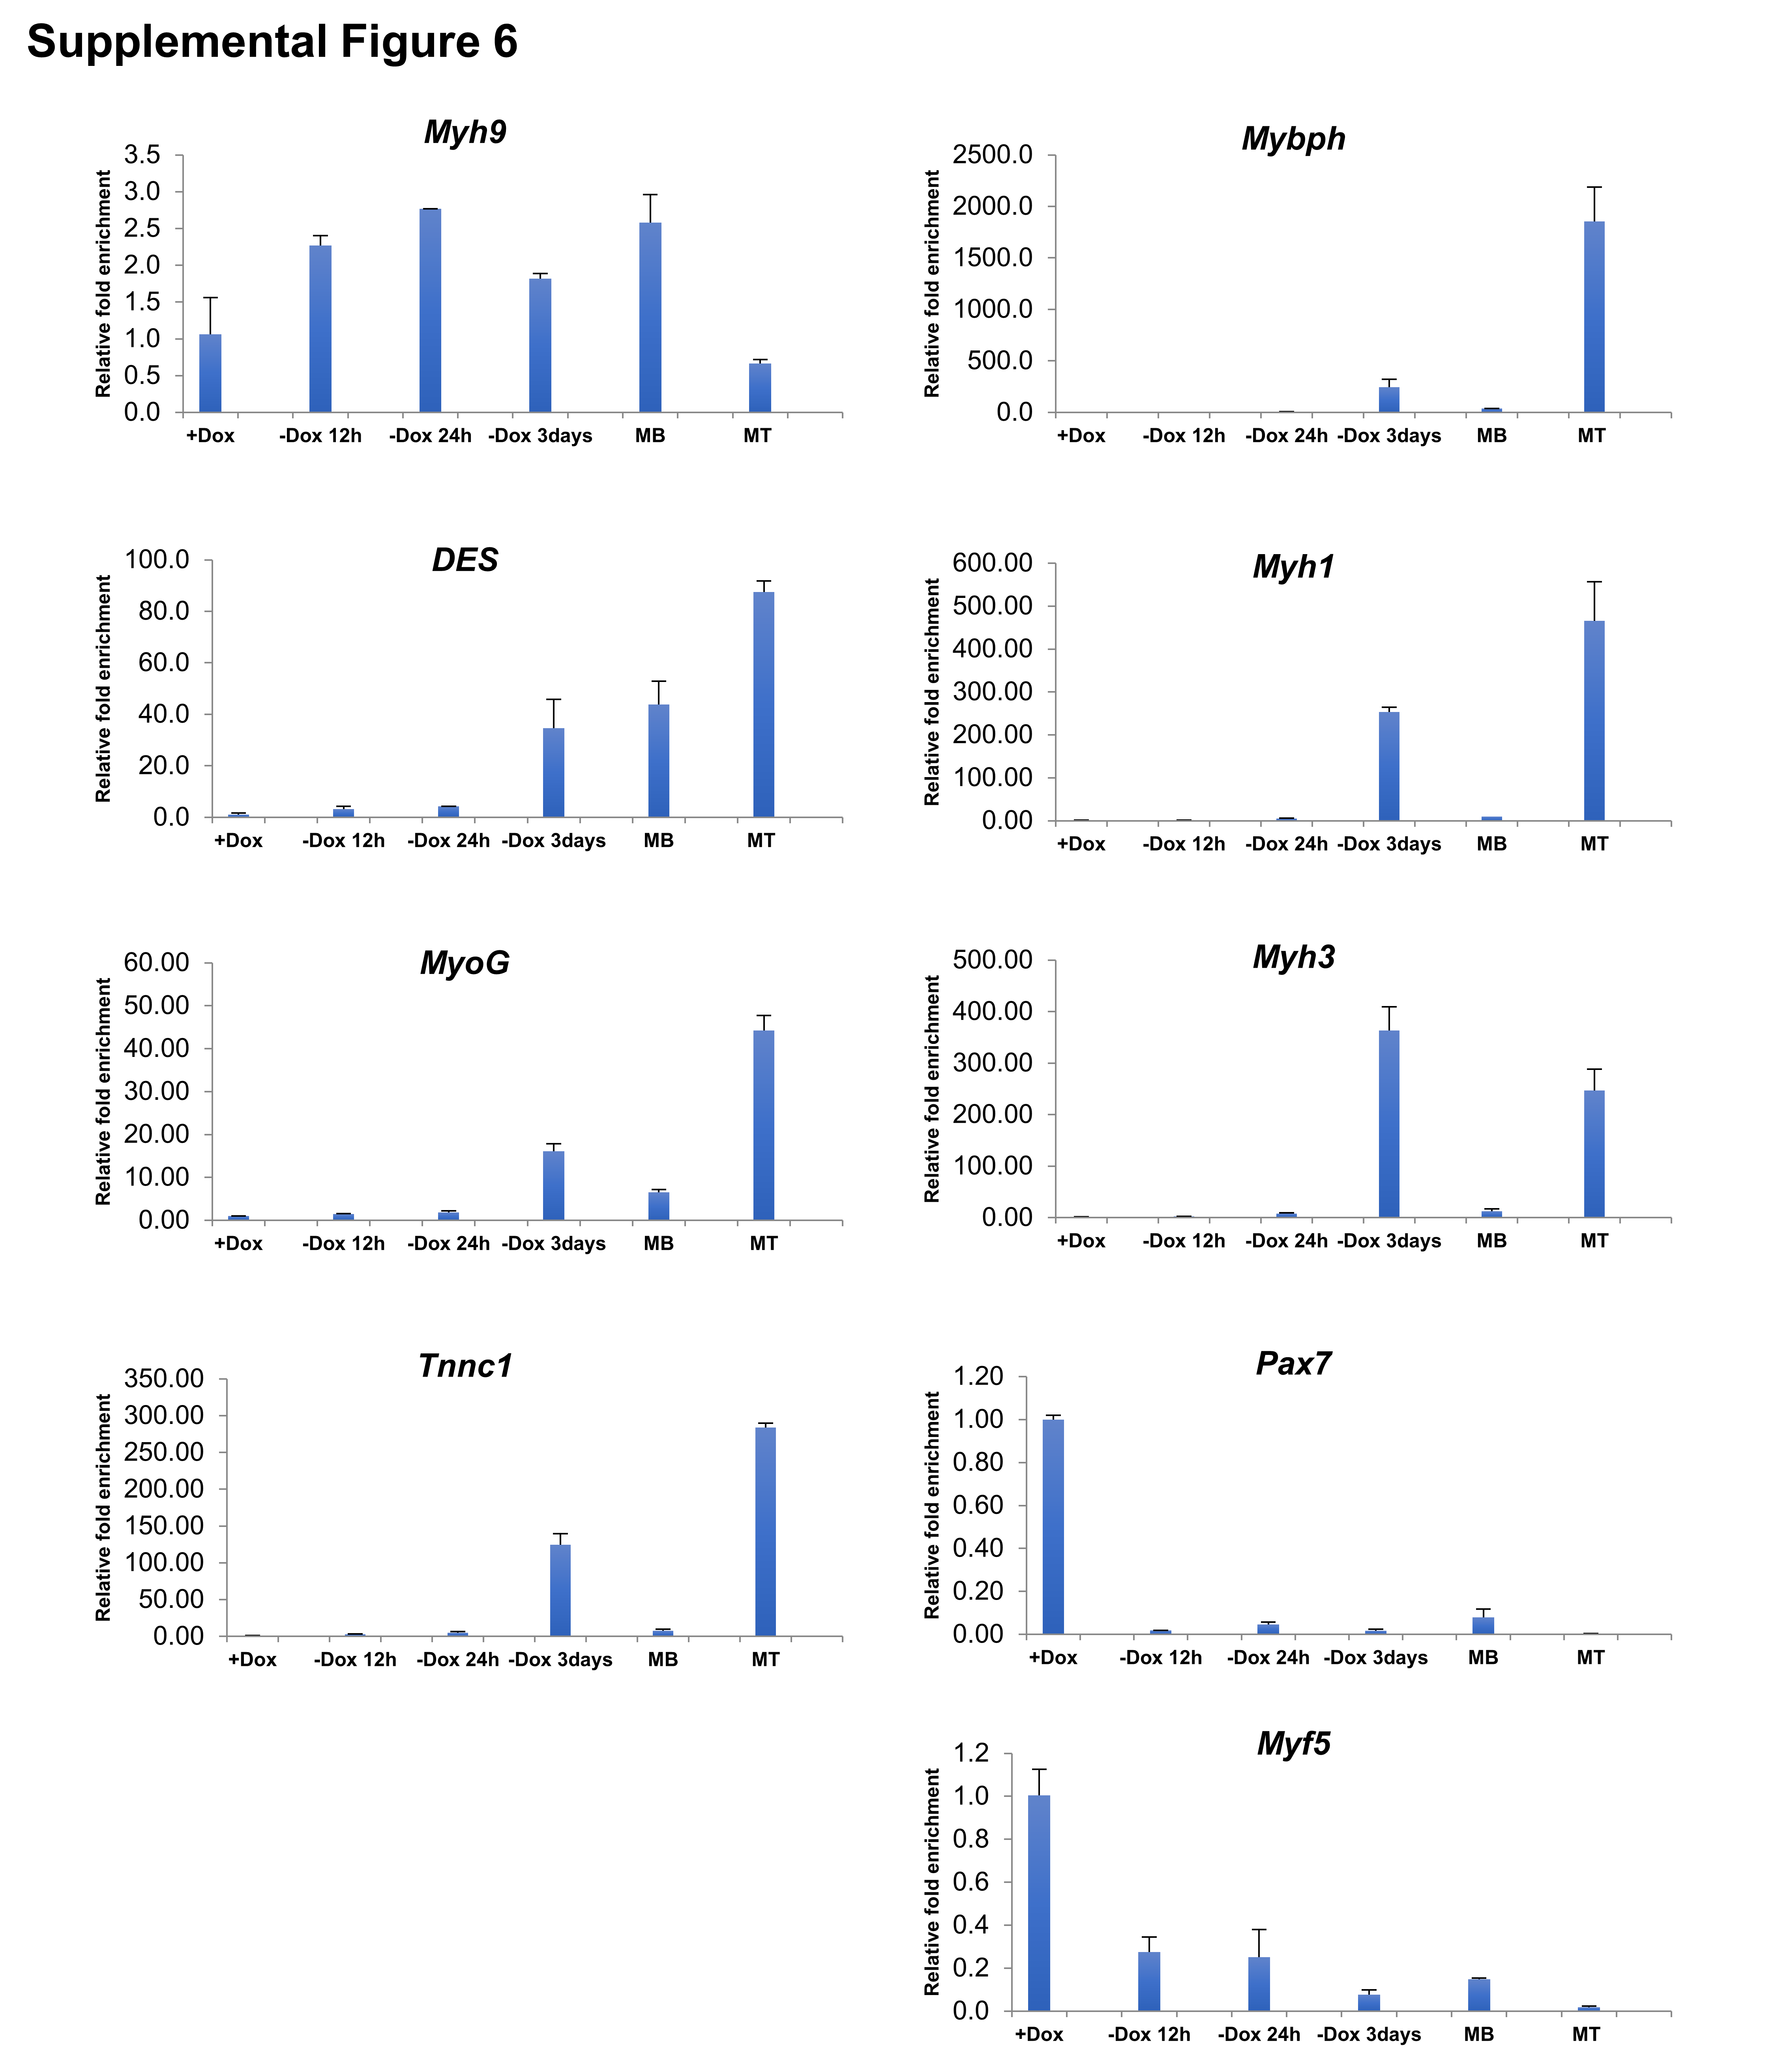

Supplement: Supplementary file 1 [file 1 › S6 Fig.TIF]

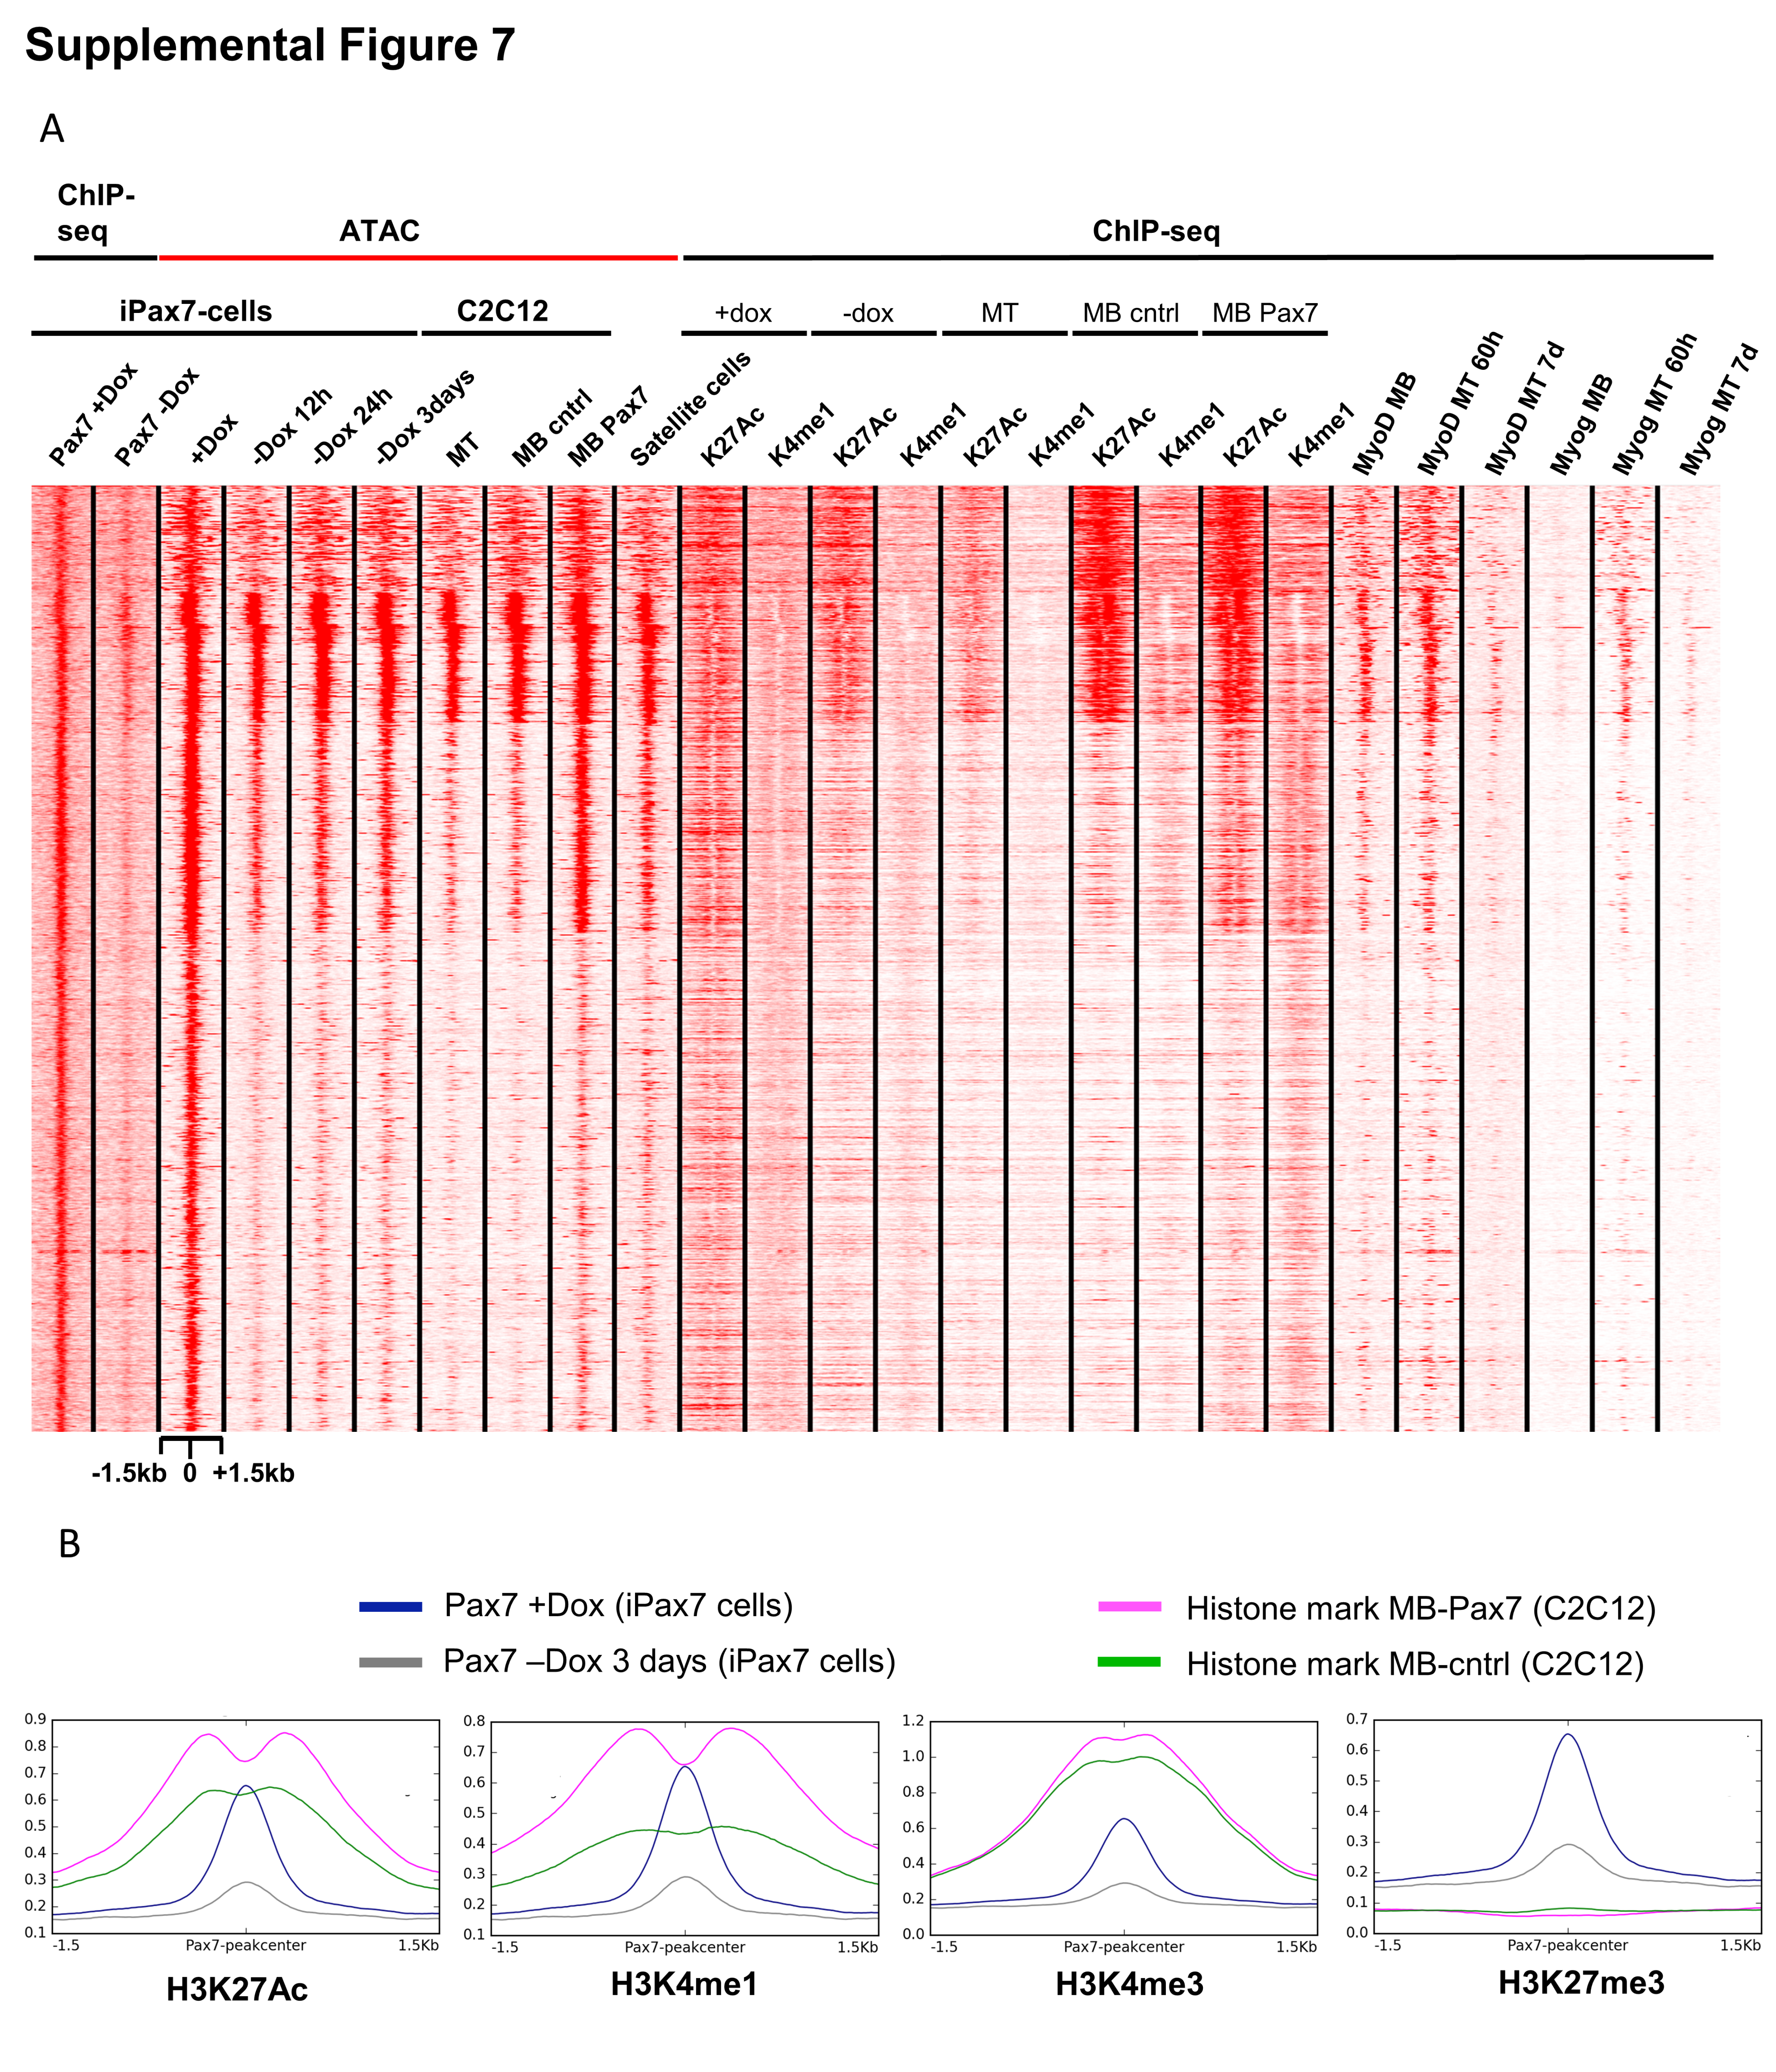

Supplement: Supplementary file 1 [file 1 › S7 Fig.tif]
